# Supplementary material for: 1,3-Dipolar cycloaddition of cycloimmonium salts and 4-(trimethylsilyl)-3-butyn-2-one to access new functionalized indolizines with potential cytostatic activity
Source: Royal Society of Chemistry journal article supplement (doi:10.1039/d2nj05257a), 2023-01-01
Supplement: d2nj05257a1.pdf [file d2nj05257a1.pdf]

## 1,3-Dipolar cycloaddition of cycloimmonium salts and 4-(trimethylsilyl)-3-butyn-2-one to access new functionalized indolizines with potential cytostatic activity

Andreea ZUBAȘ,<sup>a</sup> Alina GHINET,<sup>a,b,c,\*</sup> Sergiu SHOVA<sup>d</sup> and Elena BÎCU,<sup>a,\*</sup>

<sup>a</sup> 'Alexandru Ioan Cuza' University of Iasi, Faculty of Chemistry, Bd. Carol I, nr. 11, 700506 Iasi, Romania.

<sup>b</sup> Junia, Health and Environment, Laboratory of Sustainable Chemistry and Health, F-59000 Lille, France.

<sup>c</sup> Univ. Lille, Inserm, CHU Lille, Institut Pasteur Lille, U1167 - RID-AGE - Facteurs de risque et déterminants moléculaires des maladies liées au vieillissement, F-59000 Lille, France.

<sup>d</sup> 'Petru Poni' Institute of Macromolecular Chemistry, Iasi, Romania.

\* Correspondence: Corresponding authors. [alina.ghinet@junia.com](mailto:alina.ghinet@junia.com); [elena@uaic.ro](mailto:elena@uaic.ro)

### Supplementary information

|                                                                                                                                                                                                              |    |
|--------------------------------------------------------------------------------------------------------------------------------------------------------------------------------------------------------------|----|
| <b>Table S1.</b> Results of the in vitro human cancer cell growth inhibition for selected compounds <b>10e</b> , <b>10e'</b> , <b>10g</b> , <b>10i</b> , <b>10k</b> , <b>10l</b> , <b>10m</b> and <b>17m</b> | 2  |
| <sup>1</sup> H and <sup>13</sup> C NMR spectra of compounds                                                                                                                                                  | 4  |
| Superimposition of full <sup>1</sup> H NMR spectra of compounds <b>10a</b> , <b>14a</b> and <b>15a</b>                                                                                                       | 47 |
| One-dose full graphs obtained on NCI-60 cancer cell lines panel                                                                                                                                              | 48 |
| Table S2. Bond distances (Å) and angles (°) for compounds <b>14a</b> , <b>15a</b> and <b>10n'</b>                                                                                                            | 56 |
| Pictures of dipolarophiles (Figure S2)                                                                                                                                                                       | 63 |

**Table S1.** Results of the *in vitro* human cancer cell growth inhibition for selected compounds **10e**, **10e'**, **10g**, **10i**, **10k**, **10l**, **10m** and **17m**.

|                                  | Compound    | 10e                              | 10e'       | 10g       | 10i    | 10k                    | 10l    | 10m       | 17m    |
|----------------------------------|-------------|----------------------------------|------------|-----------|--------|------------------------|--------|-----------|--------|
|                                  | NSC         | 826668                           | 826669     | 833245    | 831789 | 835650                 | 833244 | 835652    | 835648 |
| Cell type                        | Cell line   | GI% <sup>a, b</sup> (10 $\mu$ M) |            |           |        |                        |        |           |        |
| Leukemia                         | CCRF-CEM    | 4                                | 53         | 0         | 0      | 75                     | 0      | 17        | 18     |
|                                  | HL-60(TB)   | 11                               | <b>91</b>  | 22        | 0      | 67                     | 0      | 5         | 0      |
|                                  | K-562       | 5                                | 81         | 14        | 0      | 81                     | 18     | 16        | 37     |
|                                  | MOLT-4      | 8                                | 72         | 18        | 0      | 77                     | 0      | 33        | 40     |
|                                  | RPMI-8226   | 5                                | 45         | 32        | 0      | 80                     | 0      | 37        | 35     |
|                                  | SR          | 3                                | 73         | 68        | 0      | <b>93</b>              | 22     | 37        | 31     |
| Non-Small<br>Cell Lung<br>Cancer | A549/ATCC   | 0                                | 53         | 55        | 0      | 43                     | 17     | 70        | 11     |
|                                  | EKVX        | 0                                | 53         | 51        | 0      | 47                     | 19     | 25        | 10     |
|                                  | HOP-62      | 0                                | 48         | 65        | 9      | 41                     | 60     | 26        | 0      |
|                                  | HOP-92      | 0                                | 3          | 53        | 0      | 62                     | 19     | 0         | 7      |
|                                  | NCI-H226    | 10                               | 34         | 56        | 0      | 60                     | 36     | 38        | 12     |
|                                  | NCI-H23     | 0                                | 51         | 52        | 5      | 58                     | 27     | 42        | 23     |
|                                  | NCI-H460    | 0                                | 84         | 56        | 0      | 88                     | 22     | 36        | 0      |
|                                  | NCI-H522    | 10                               | 62         | <b>98</b> | 4      | 50                     | 35     | 28        | 9      |
| Colon<br>Cancer                  | COLO 205    | 0                                | 60         | 7         | 0      | 32                     | 14     | 8         | 0      |
|                                  | HCC-2998    | 0                                | 38         | 24        | 0      | 67                     | 14     | 12        | 9      |
|                                  | HCT-116     | 5                                | 82         | 80        | 0      | <b>93</b>              | 27     | 55        | 31     |
|                                  | HCT-15      | 11                               | 81         | 34        | 0      | <b>90</b>              | 9      | 28        | 28     |
|                                  | HT29        | 0                                | 84         | 28        | 0      | 67                     | 19     | 43        | 43     |
|                                  | KM12        | 3                                | 71         | 29        | 0      | 72                     | 0      | 49        | 18     |
|                                  | SW-620      | 0                                | 68         | 18        | 0      | 74                     | 19     | 7         | 9      |
| CNS<br>Cancer                    | SF-268      | 0                                | 39         | 77        | 3      | 51                     | 26     | 21        | 6      |
|                                  | SF-295      | 0                                | <b>92</b>  | 69        | 0      | 64                     | 45     | 0         | 0      |
|                                  | SF-539      | 2                                | 65         | 76        | 0      | 67                     | 34     | 68        | 7      |
|                                  | SNB-19      | 21                               | 60         | 75        | 3      | 50                     | 38     | 30        | 7      |
|                                  | SNB-75      | 35                               | <b>94</b>  | <b>98</b> | 3      | 17                     | 55     | 0         | 0      |
|                                  | U251        | 3                                | 66         | 68        | 0      | 64                     | 28     | 73        | 12     |
| Melanoma                         | LOX IMVI    | 3                                | 66         | 45        | 7      | <b>-40<sup>c</sup></b> | 18     | 43        | 6      |
|                                  | MALME-3M    | 11                               | 56         | 28        | 9      | 46                     | 23     | <b>-6</b> | 0      |
|                                  | M14         | 4                                | 84         | 15        | 0      | 64                     | 0      | 35        | 5      |
|                                  | MDA-MB-435  | 3                                | <b>-13</b> | 51        | 0      | 72                     | 27     | 19        | 0      |
|                                  | SK-MEL-2    | 0                                | 62         | 29        | 0      | 28                     | 0      | 0         | 0      |
|                                  | SK-MEL-28   | 0                                | 42         | 27        | 0      | <b>51</b>              | 20     | 12        | 0      |
|                                  | SK-MEL-5    | 3                                | 63         | 76        | 0      | <b>-36</b>             | 14     | 42        | 19     |
|                                  | UACC-257    | 0                                | 33         | 21        | 0      | 68                     | 0      | 14        | 6      |
|                                  | UACC-62     | 30                               | 83         | 37        | 0      | 76                     | 29     | 5         | 13     |
| Ovarian<br>Cancer                | IGROV1      | 0                                | 58         | 19        | 57     | 63                     | 7      | 4         | 6      |
|                                  | OVCAR-3     | 0                                | 72         | 56        | 0      | 42                     | 7      | 0         | 5      |
|                                  | OVCAR-4     | 10                               | 20         | 50        | 0      | 48                     | 40     | 52        | 29     |
|                                  | OVCAR-8     | 0                                | 49         | 20        | 0      | 54                     | 0      | 50        | 6      |
|                                  | NCI/ADR-RES | 0                                | 82         | 65        | 0      | 82                     | 33     | 31        | 0      |
|                                  | SK-OV-3     | 0                                | 23         | 71        | 0      | 0                      | 17     | 0         | 21     |
| Renal<br>Cancer                  | 786-0       | 9                                | 49         | 55        | 5      | 56                     | 30     | 48        | 0      |
|                                  | A498        | <b>-10</b>                       | 62         | 14        | 35     | 15                     | 0      | 3         | 9      |
|                                  | ACHN        | 0                                | 49         | 44        | 0      | 71                     | 33     | 50        | 0      |

|                    |                     |    |           |           |    |           |    |    |    |
|--------------------|---------------------|----|-----------|-----------|----|-----------|----|----|----|
|                    | CAKI-1              | 16 | 66        | 61        | 7  | 65        | 38 | 45 | 0  |
|                    | RXF 393             | 19 | 41        | <b>92</b> | 0  | 58        | 5  | 14 | 12 |
|                    | SN12C               | 19 | 58        | 45        | 0  | 58        | 32 | 22 | 14 |
|                    | UO-31               | 24 | 56        | 32        | 10 | 65        | 10 | 41 | 17 |
| Prostate<br>Cancer | PC-3                | 10 | 44        | 17        | 0  | 72        | 12 | 20 | 12 |
| Breast<br>Cancer   | MCF7                | 17 | 85        | 65        | 5  | 74        | 23 | 36 | 31 |
|                    | MDA-MB-<br>231/ATCC | 24 | 45        | 25        | 4  | 54        | 29 | 70 | 3  |
|                    | HS 578T             | 9  | 41        | 57        | 5  | 46        | 26 | 37 | 7  |
|                    | BT-549              | 0  | 47        | 75        | 0  | 84        | 7  | 22 | 6  |
|                    | T-47D               | 18 | 62        | 51        | 0  | 79        | 16 | 25 | 70 |
|                    | MDA-MB-468          | 18 | <b>-3</b> | 40        | 0  | <b>97</b> | 13 | 50 | 18 |

<sup>a</sup> Data obtained from NCI's *in vitro* 60-cell one dose screen at 10  $\mu$ M concentration.

<sup>b</sup> GI% is the percentage of growth inhibition of tumor cells.

<sup>c</sup> A value of -x means x% cancer cells lethality of preexisting cells (cytotoxic effect).

# NMR Spectra of compounds

## <sup>1</sup>H NMR (400 MHz, CDCl<sub>3</sub>) -10a

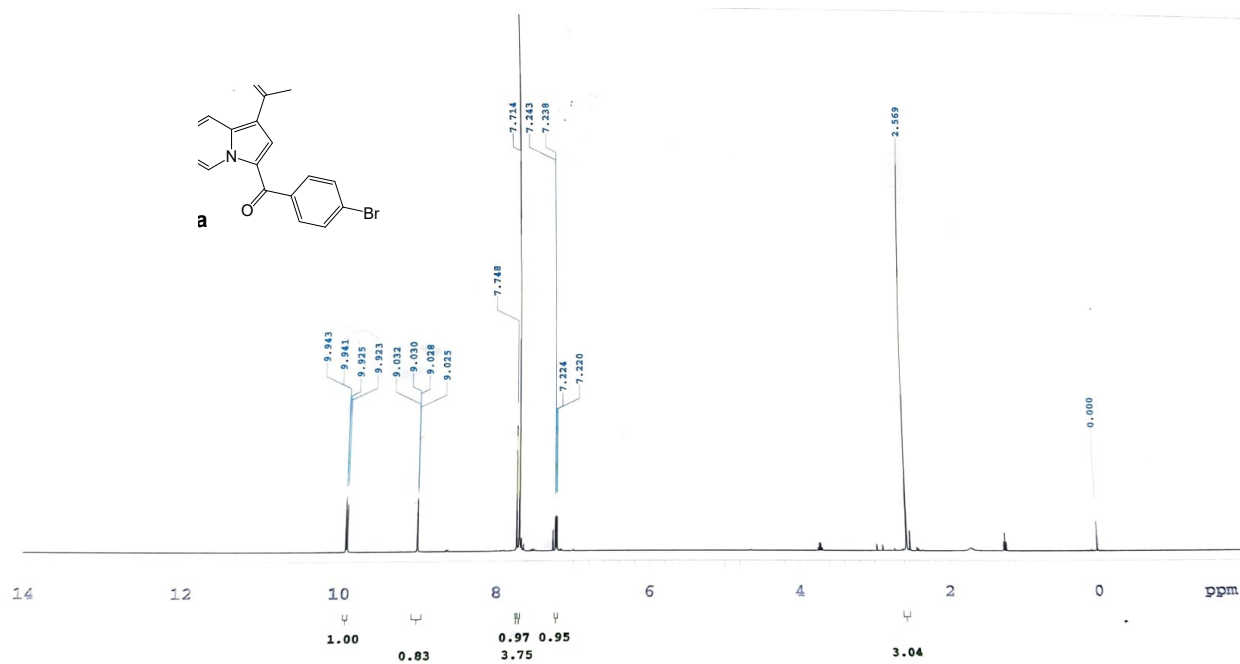

## <sup>13</sup>C NMR (100 MHz, CDCl<sub>3</sub>)

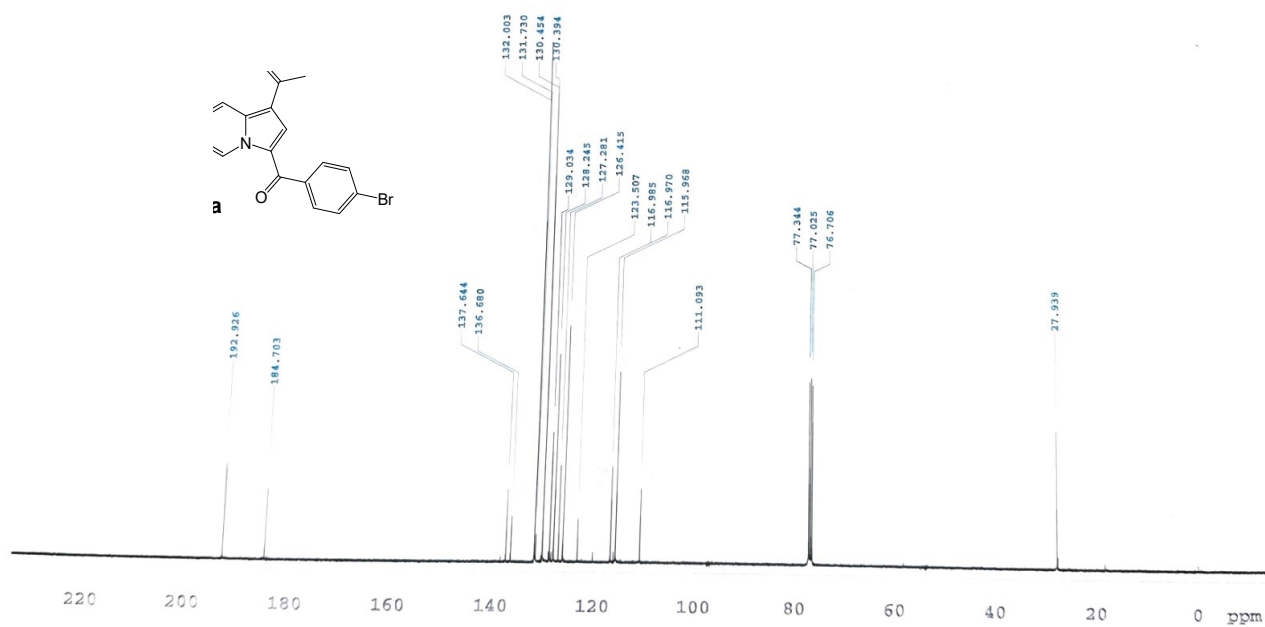

# <sup>13</sup>C-DEPT NMR (100 MHz, CDCl<sub>3</sub>)

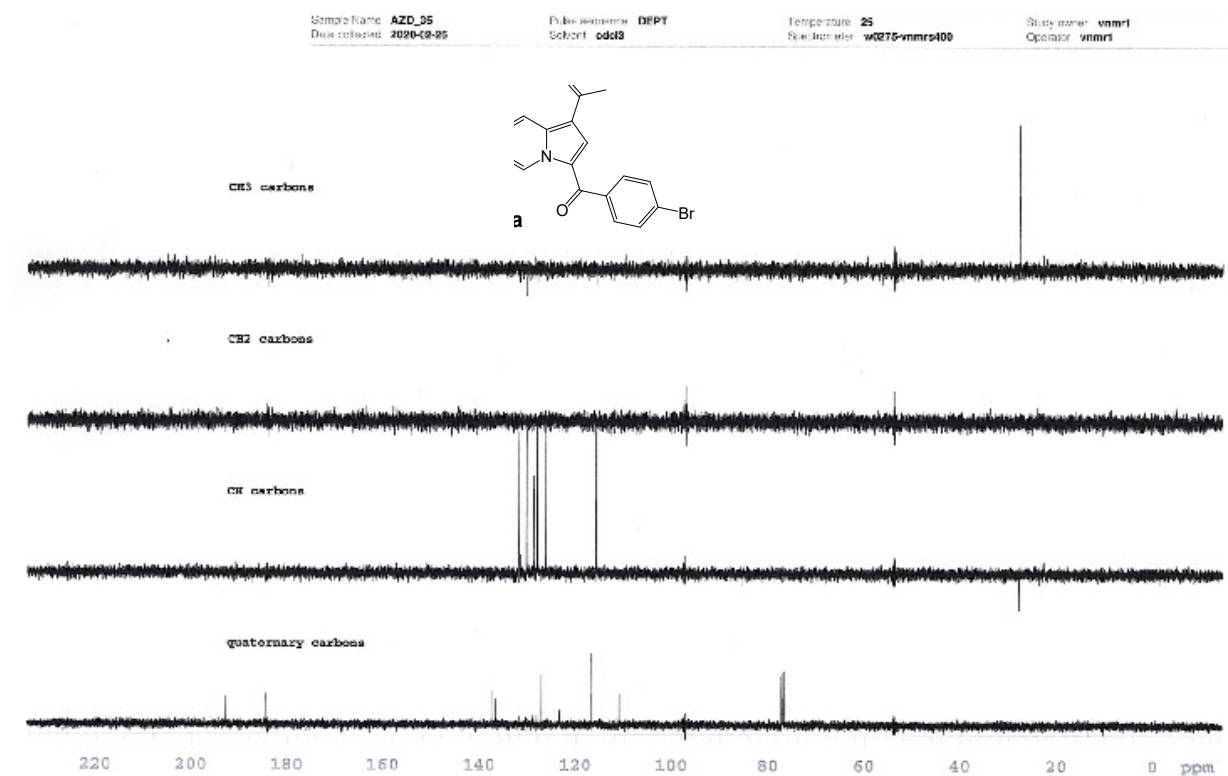

# <sup>1</sup>H NMR (500 MHz, CDCl<sub>3</sub>) -14a

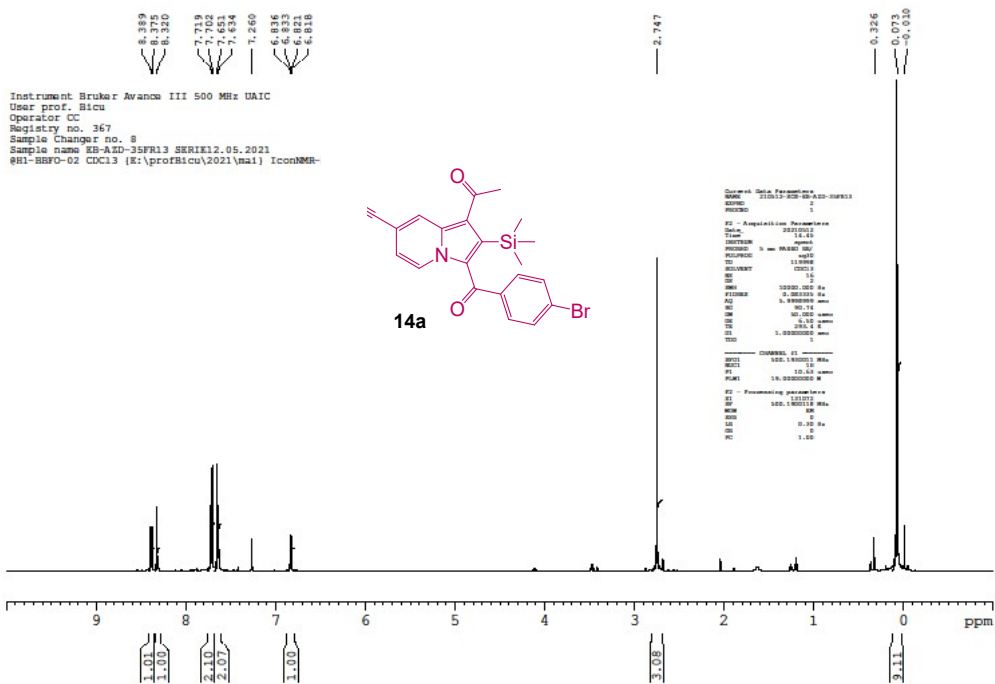

<sup>13</sup>C NMR (125 MHz, CDCl<sub>3</sub>)

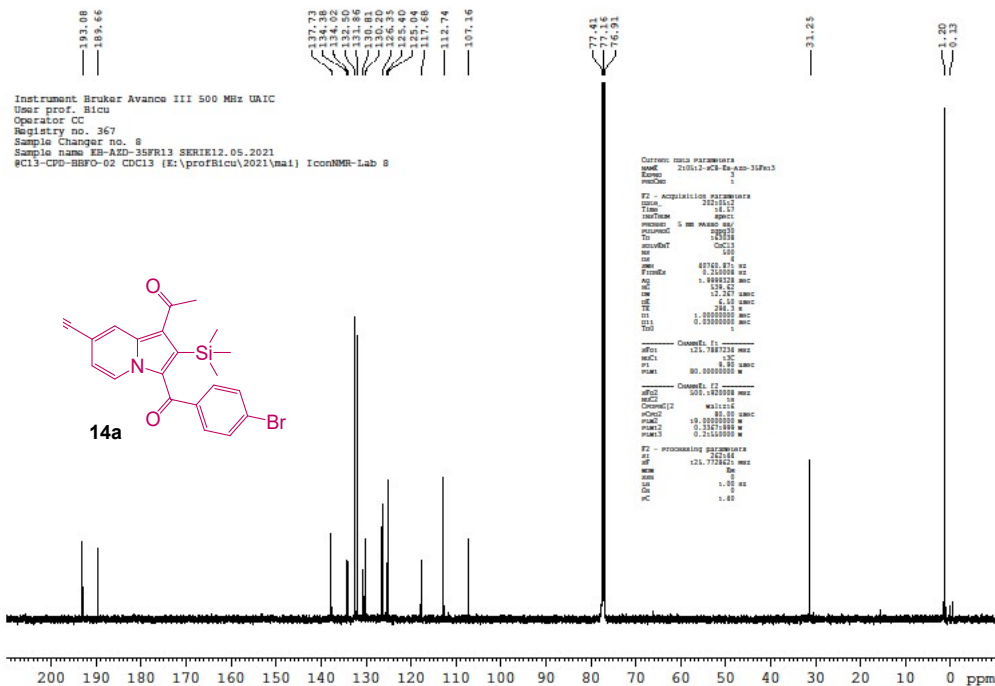

<sup>13</sup>C-DEPT NMR (125 MHz, CDCl<sub>3</sub>)

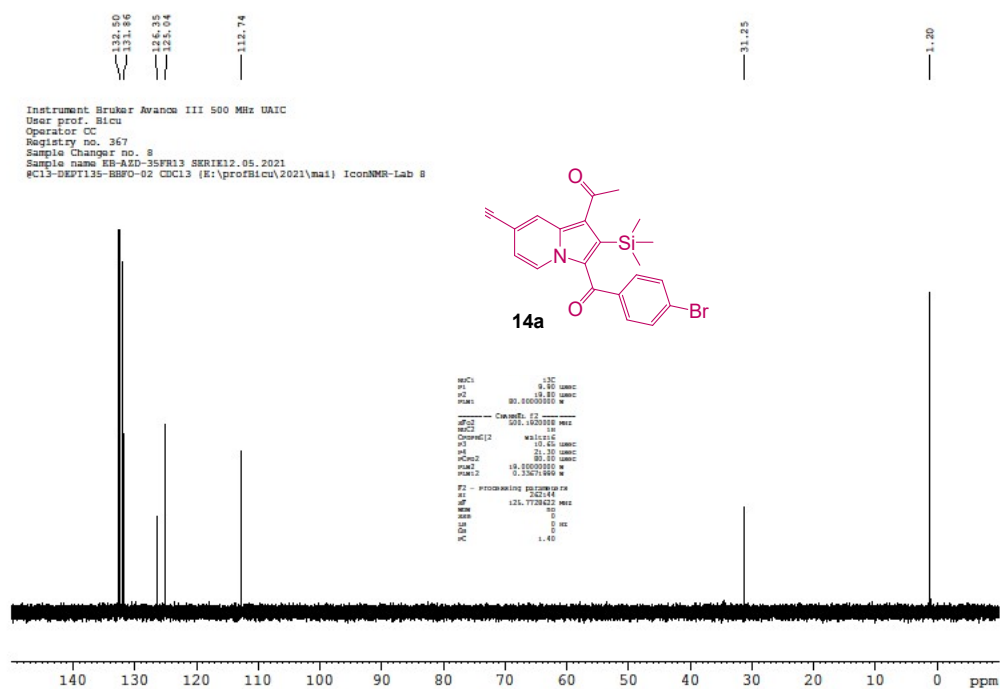

### <sup>1</sup>H NMR (500 MHz, CDCl<sub>3</sub>) -15a

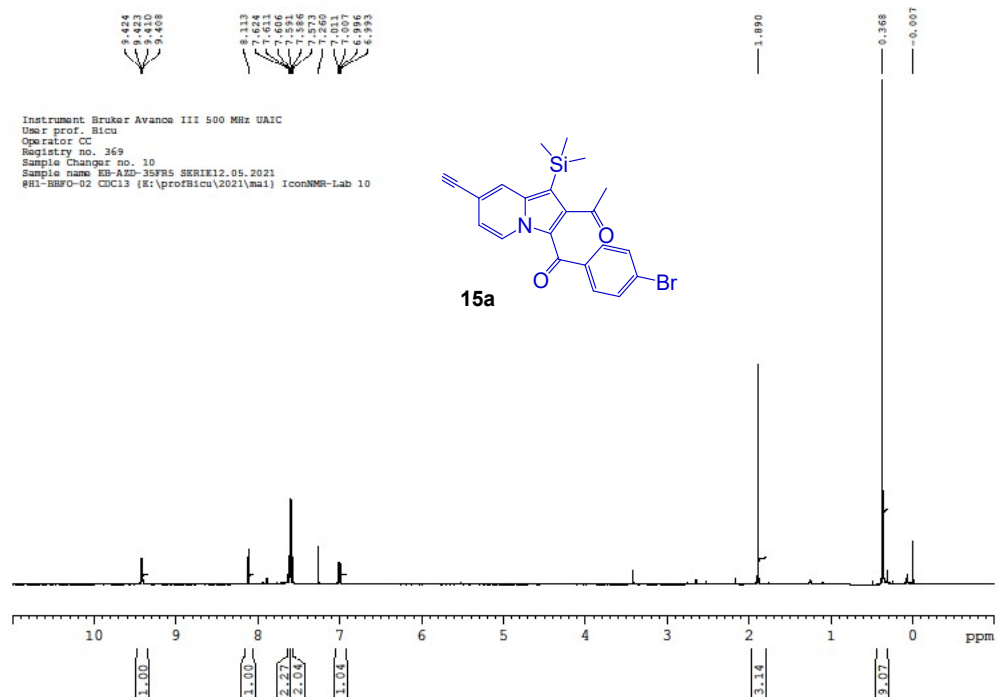

### <sup>13</sup>C NMR (125 MHz, CDCl<sub>3</sub>)

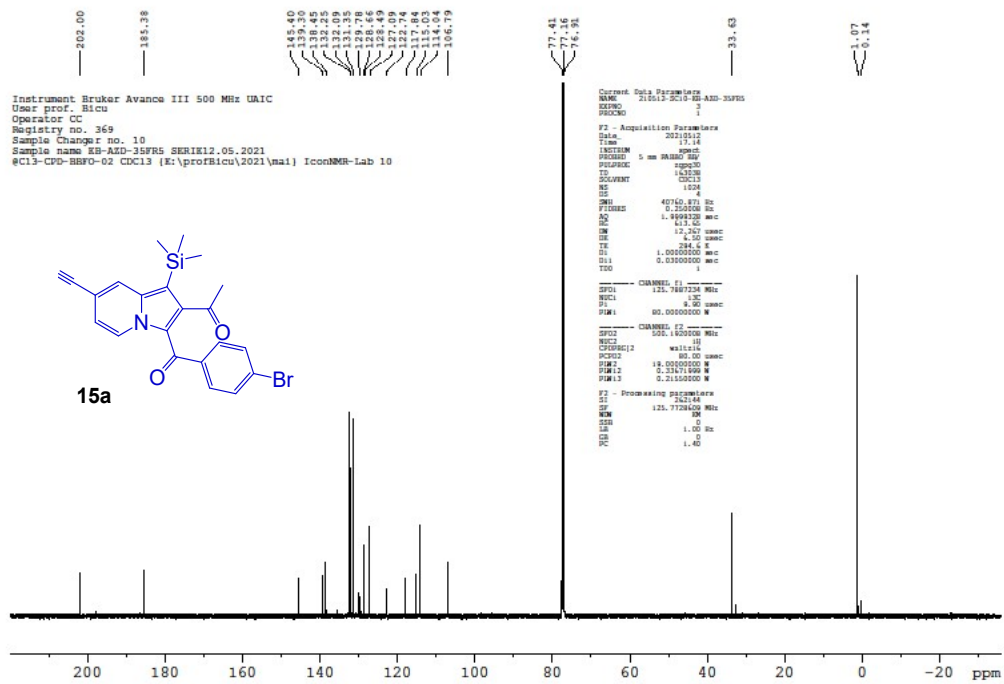



# <sup>13</sup>C-DEPT NMR (125 MHz, CDCl<sub>3</sub>)

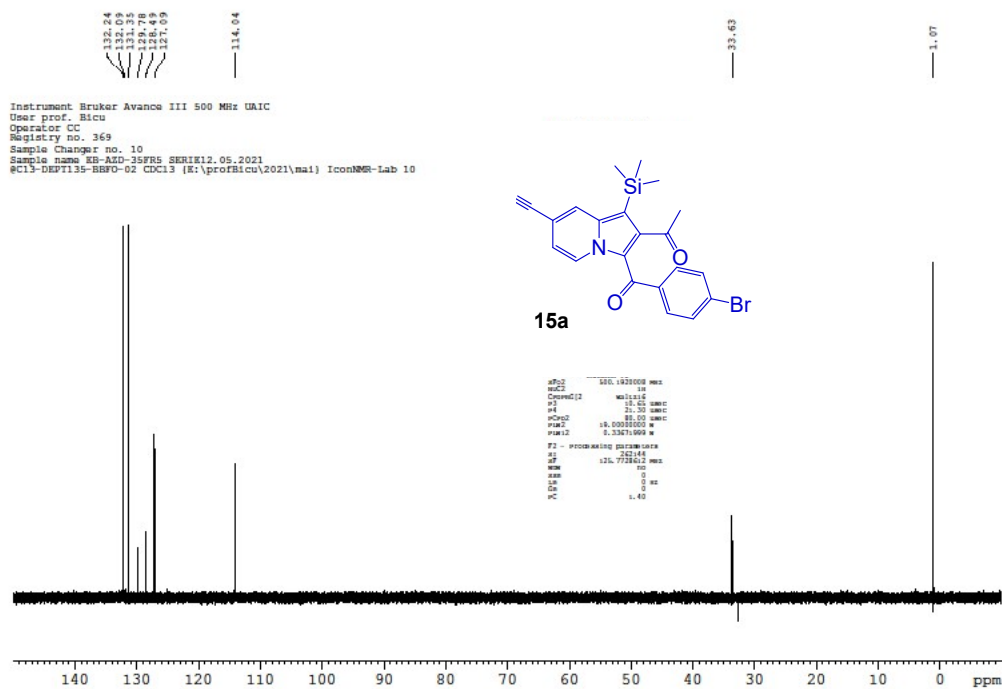

# <sup>1</sup>H NMR (500 MHz, CDCl<sub>3</sub>)-10b

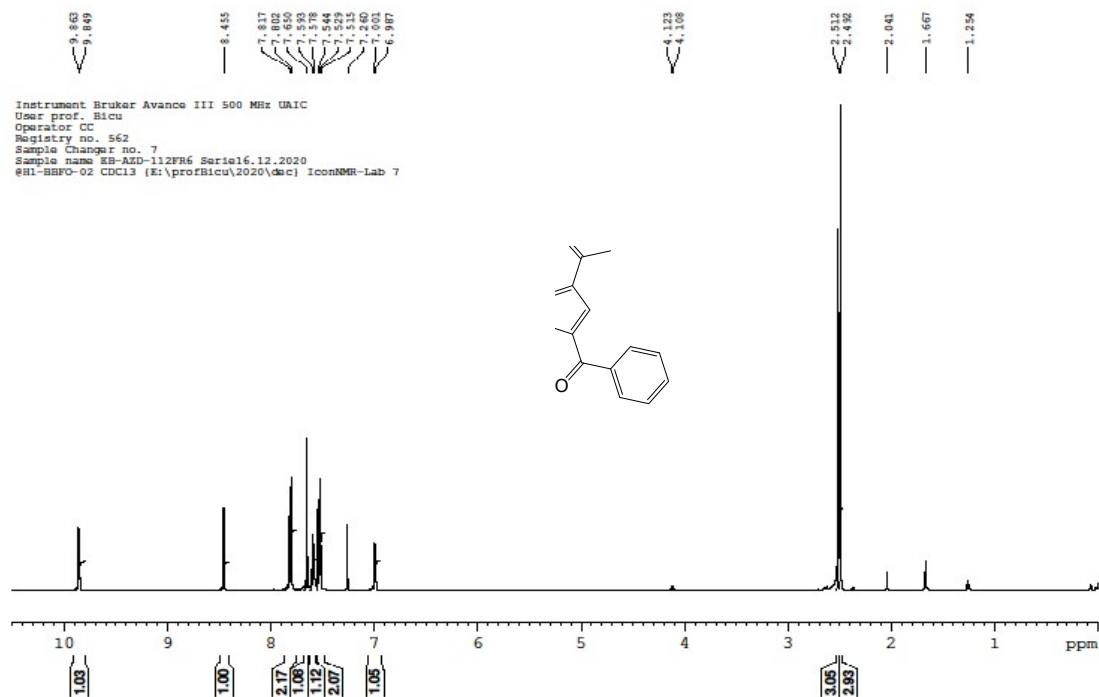

### <sup>13</sup>C NMR (125 MHz, CDCl<sub>3</sub>)

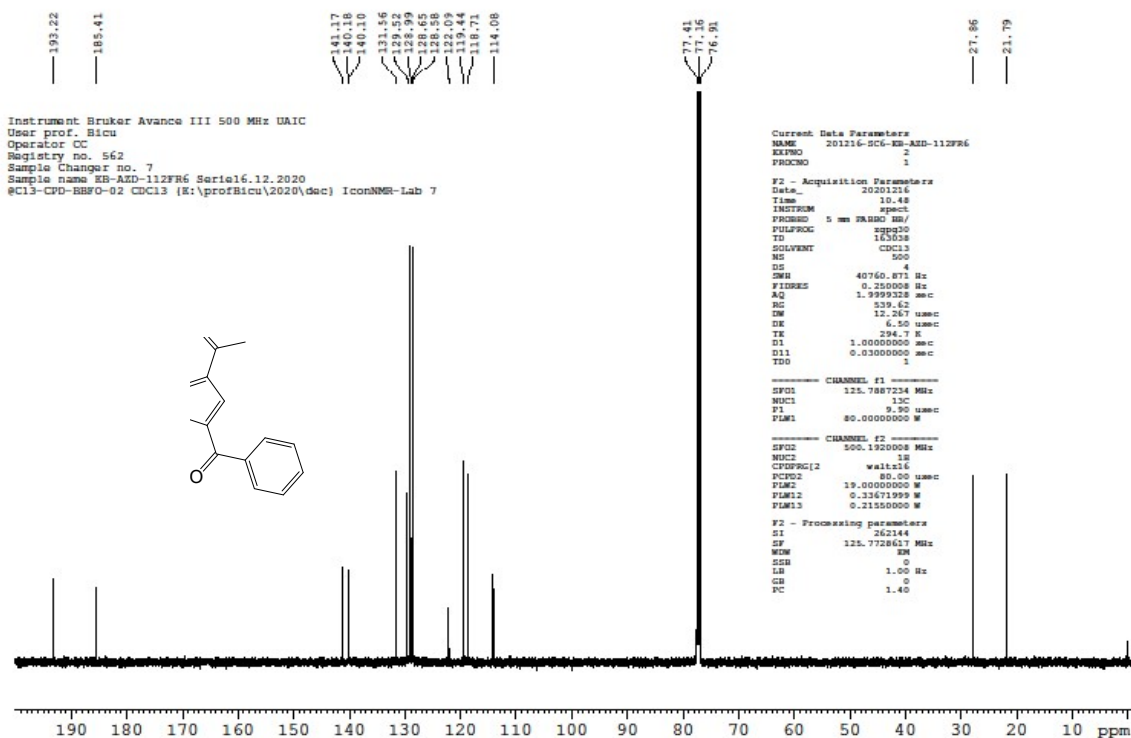

### <sup>13</sup>C-DEPT NMR (125 MHz, CDCl<sub>3</sub>)

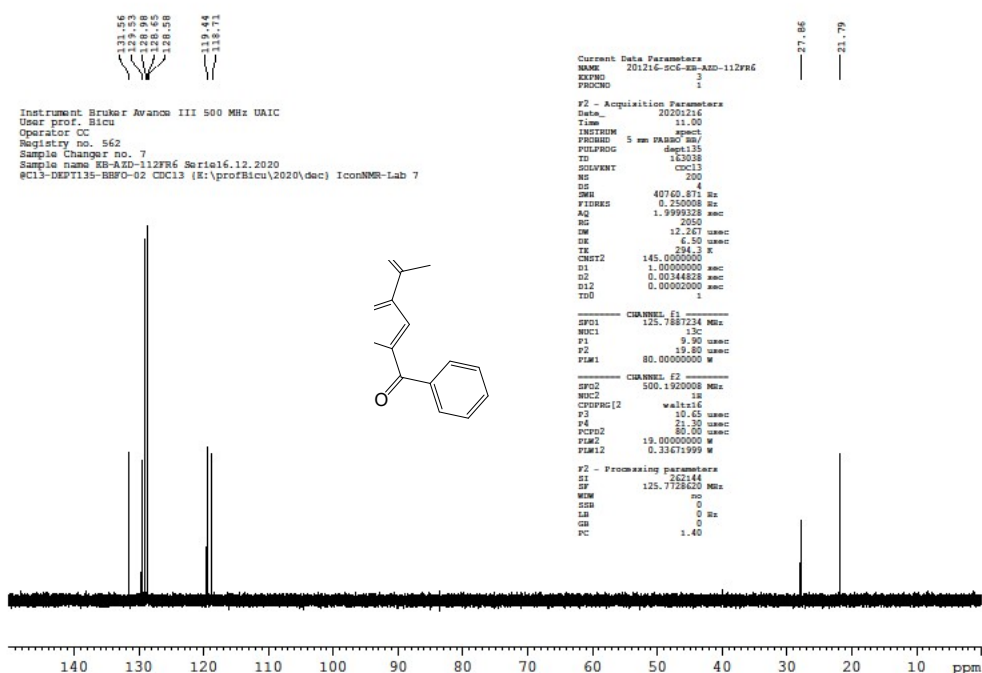



# <sup>1</sup>H NMR (500 MHz, CDCl<sub>3</sub>) -16b

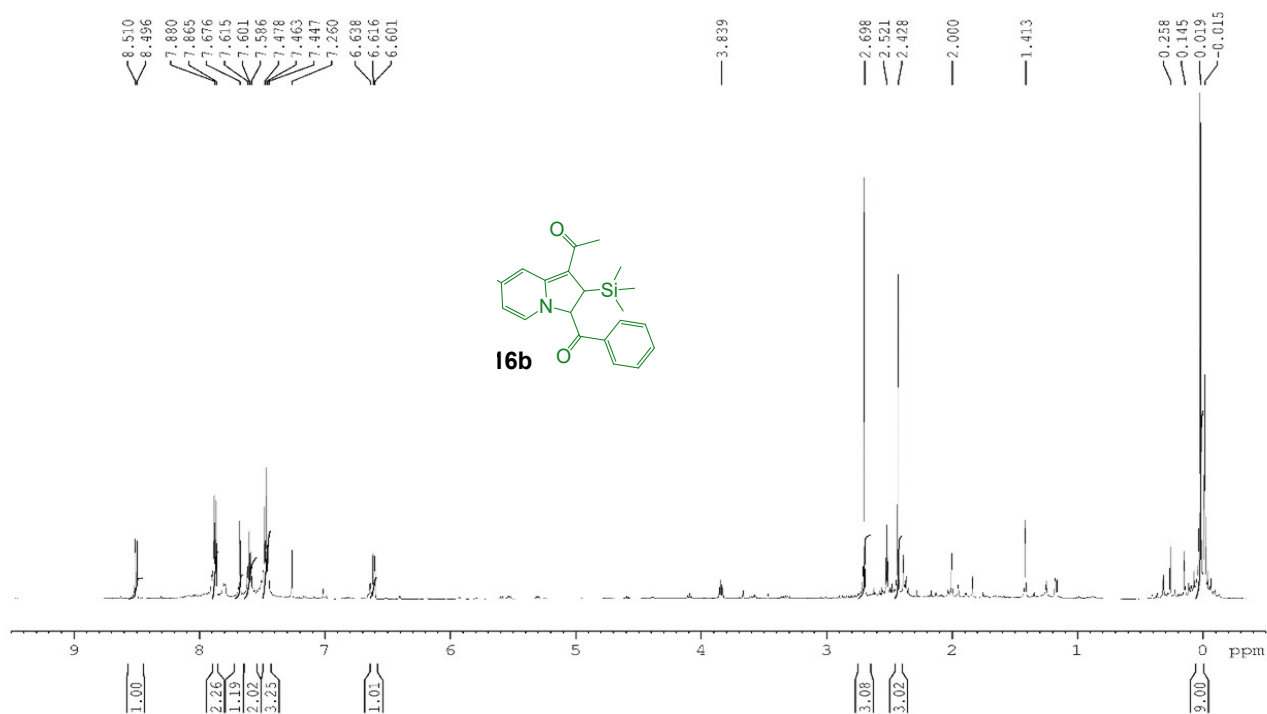

# <sup>13</sup>C NMR (125 MHz, CDCl<sub>3</sub>)

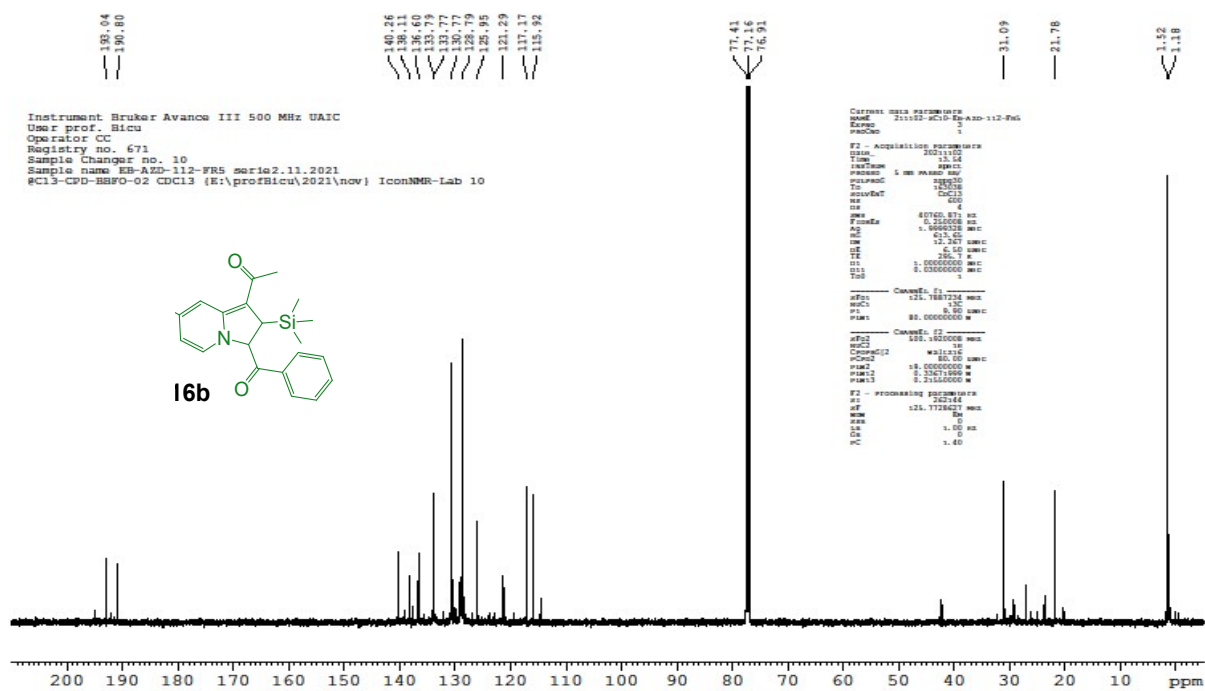

### <sup>13</sup>C-DEPT NMR (125 MHz, CDCl<sub>3</sub>)

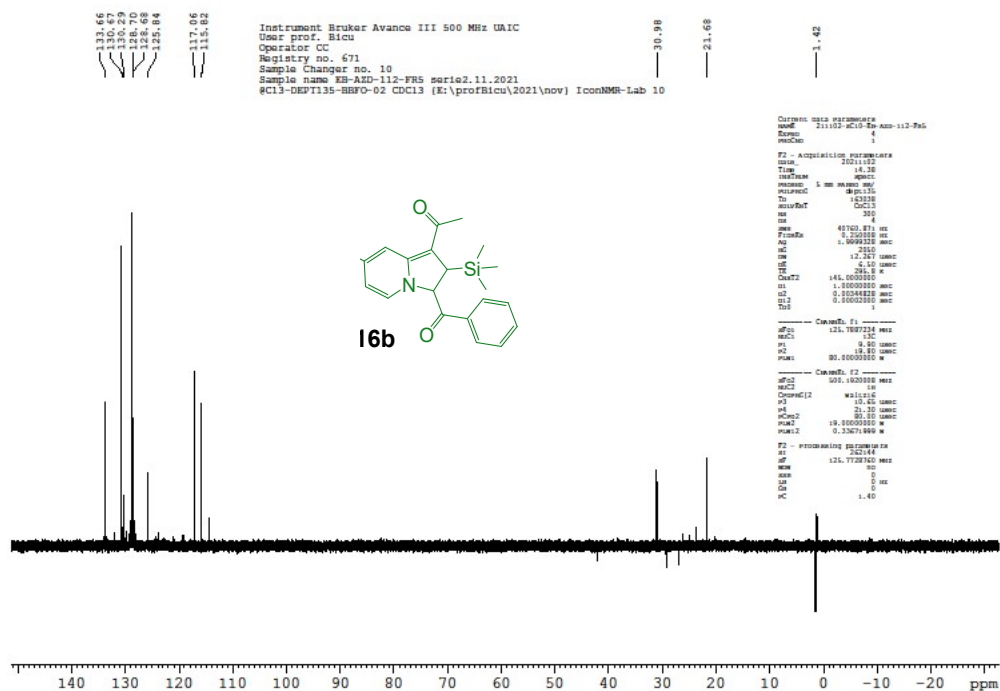

### <sup>1</sup>H NMR (500 MHz, CDCl<sub>3</sub>) -10c

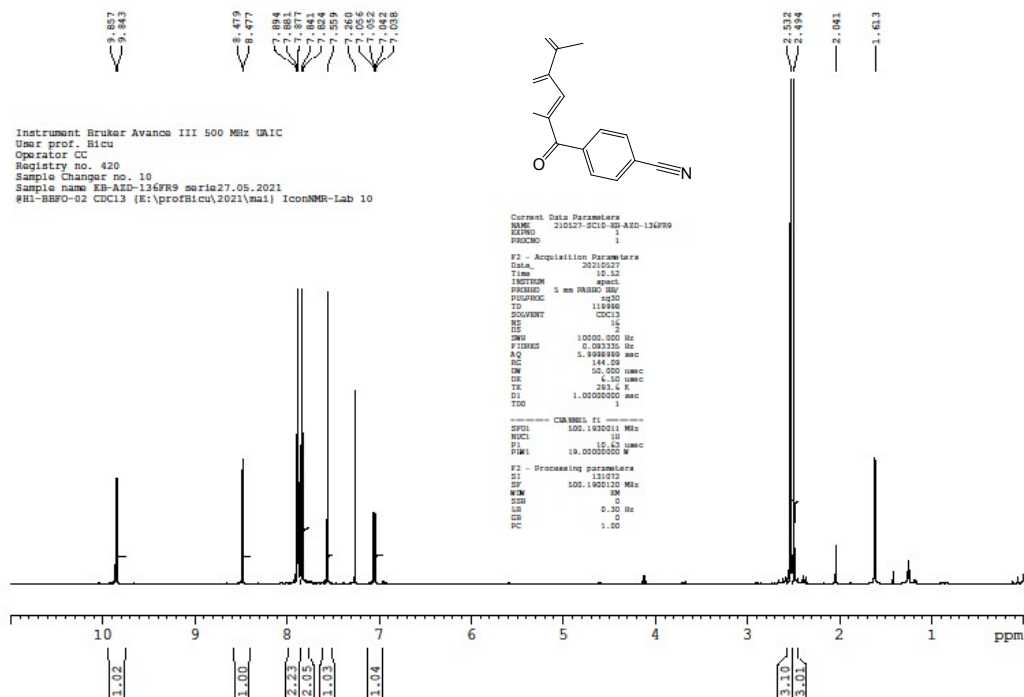

# <sup>13</sup>C NMR (125 MHz, CDCl<sub>3</sub>)

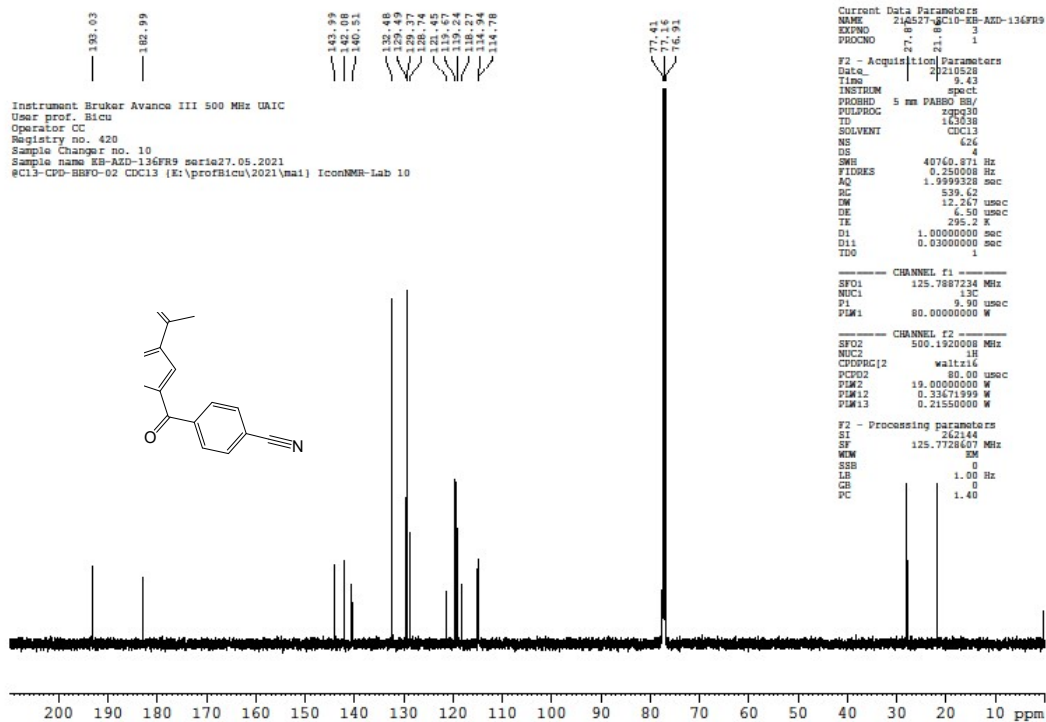

# <sup>13</sup>C-DEPT NMR (125 MHz, CDCl<sub>3</sub>)

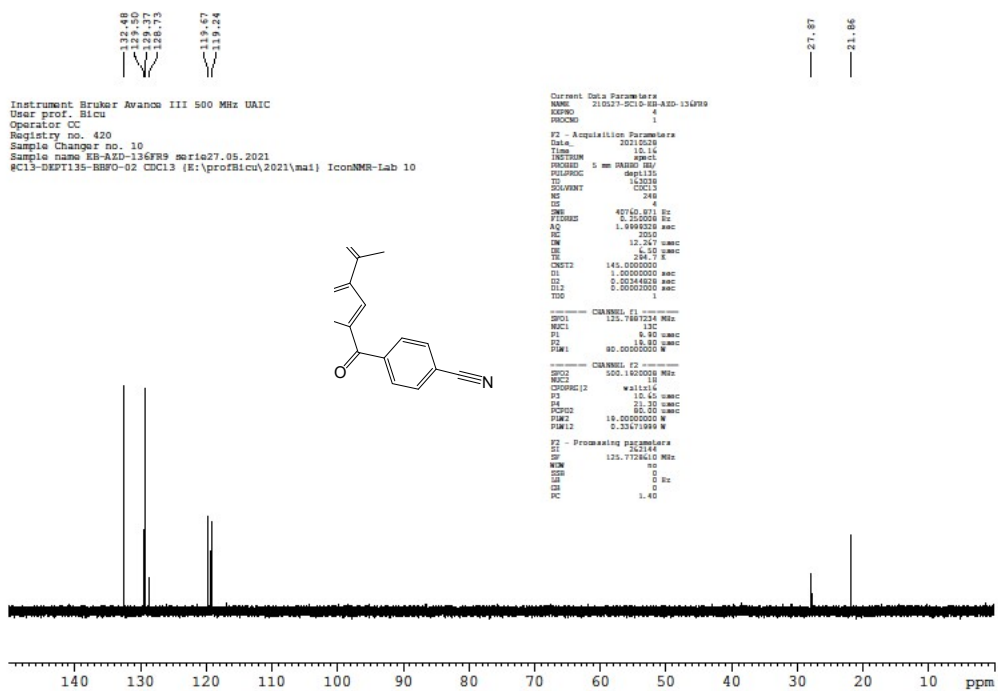

# <sup>1</sup>H NMR (500 MHz, CDCl<sub>3</sub>) -14c

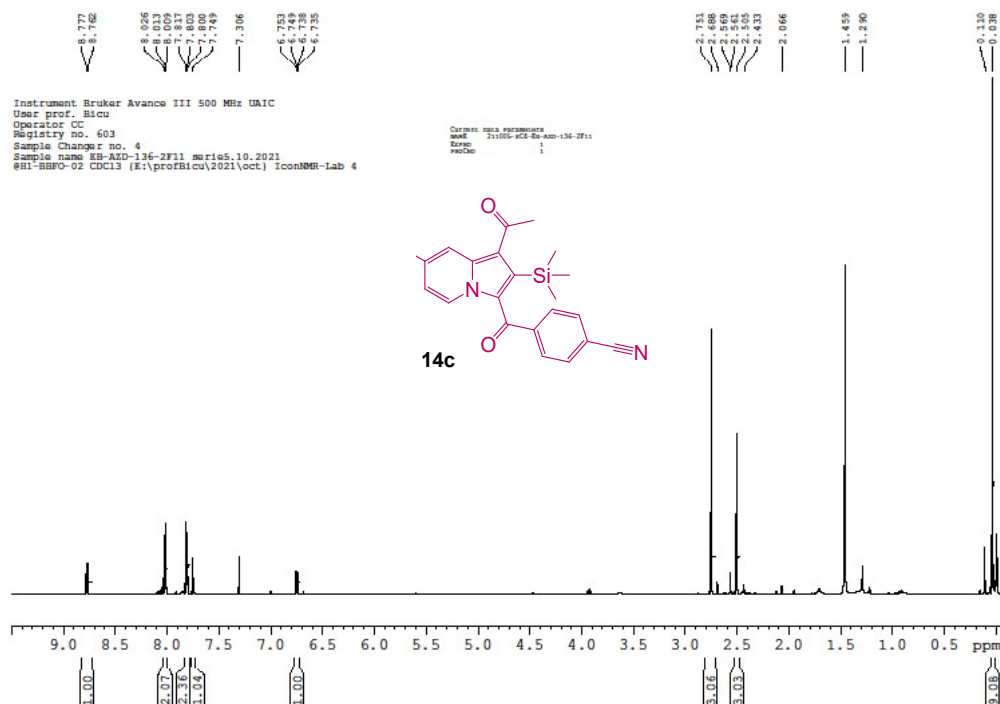

# <sup>13</sup>C NMR (125 MHz, CDCl<sub>3</sub>)

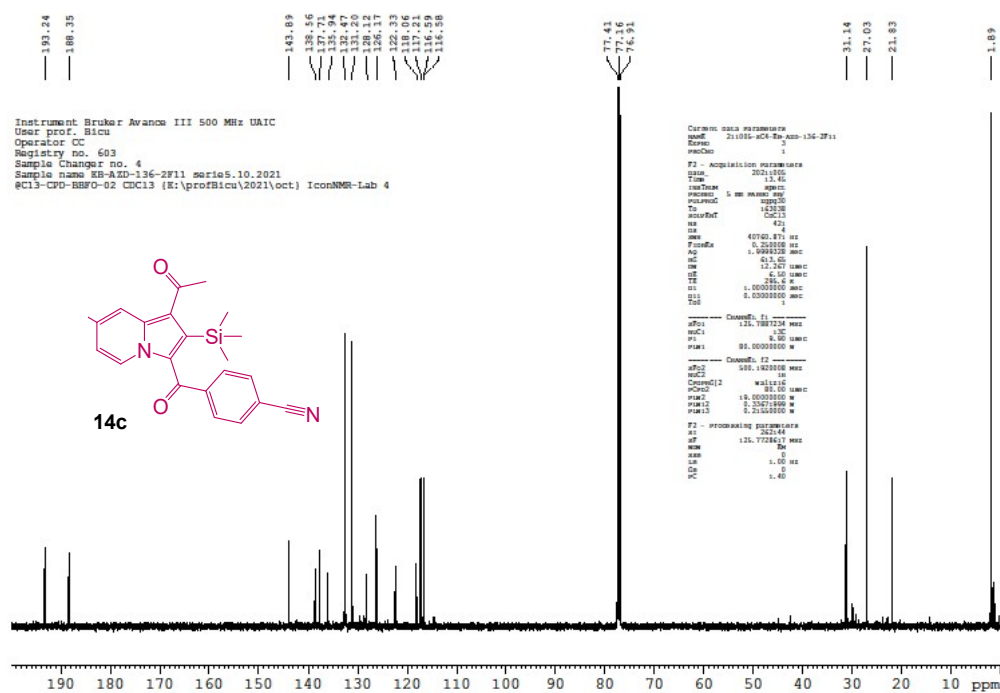

### $^{13}\text{C}$ -DEPT NMR (125 MHz, $\text{CDCl}_3$ )

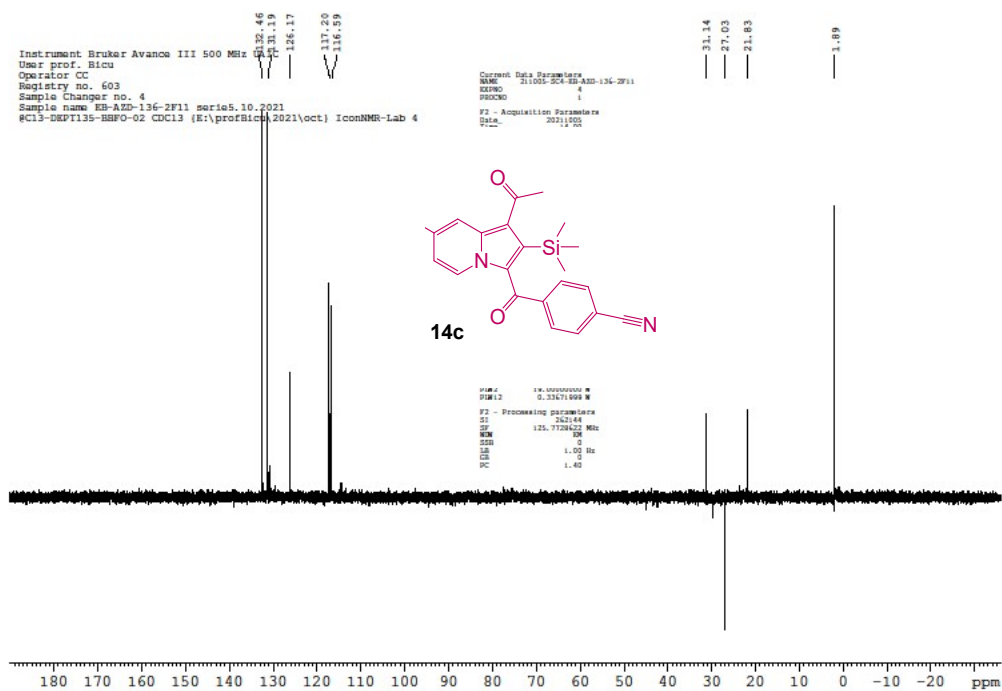

### $^1\text{H}$ NMR (500 MHz, $\text{CDCl}_3$ ) -10d

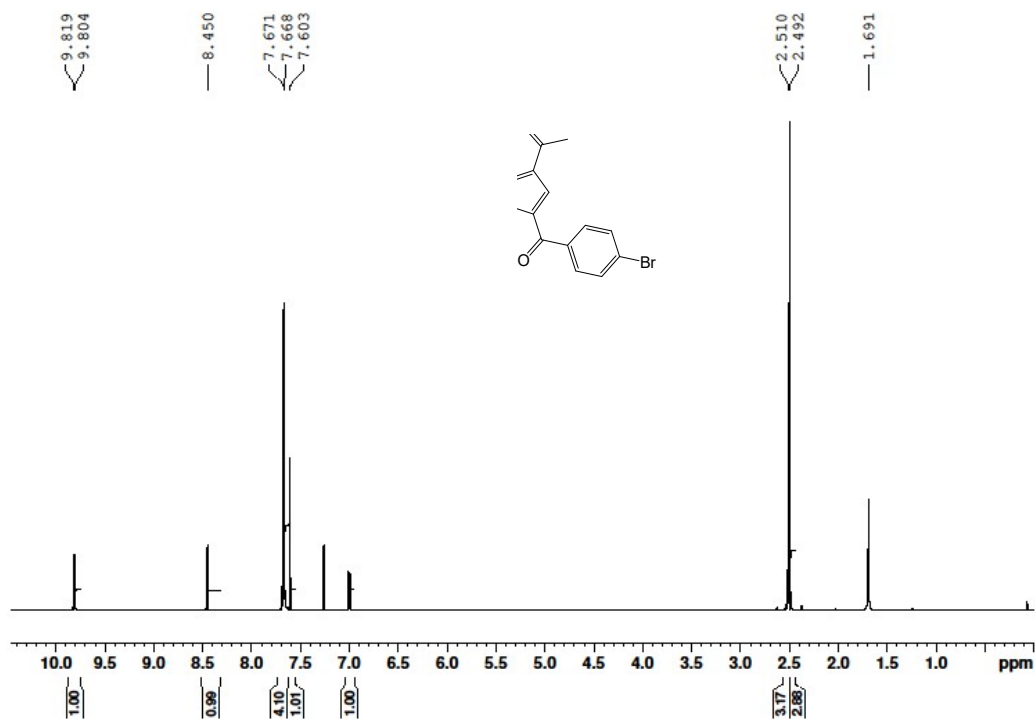



### $^{13}\text{C}$ NMR (125 MHz, $\text{CDCl}_3$ )

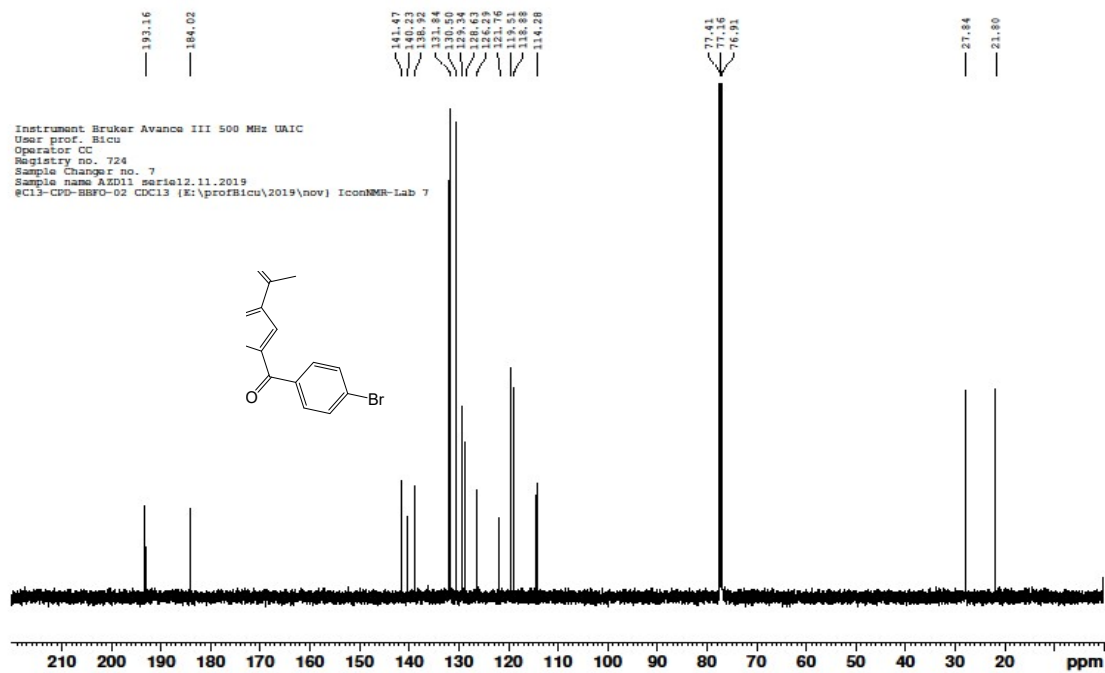

### $^{13}\text{C}$ -DEPT NMR (125 MHz, $\text{CDCl}_3$ )

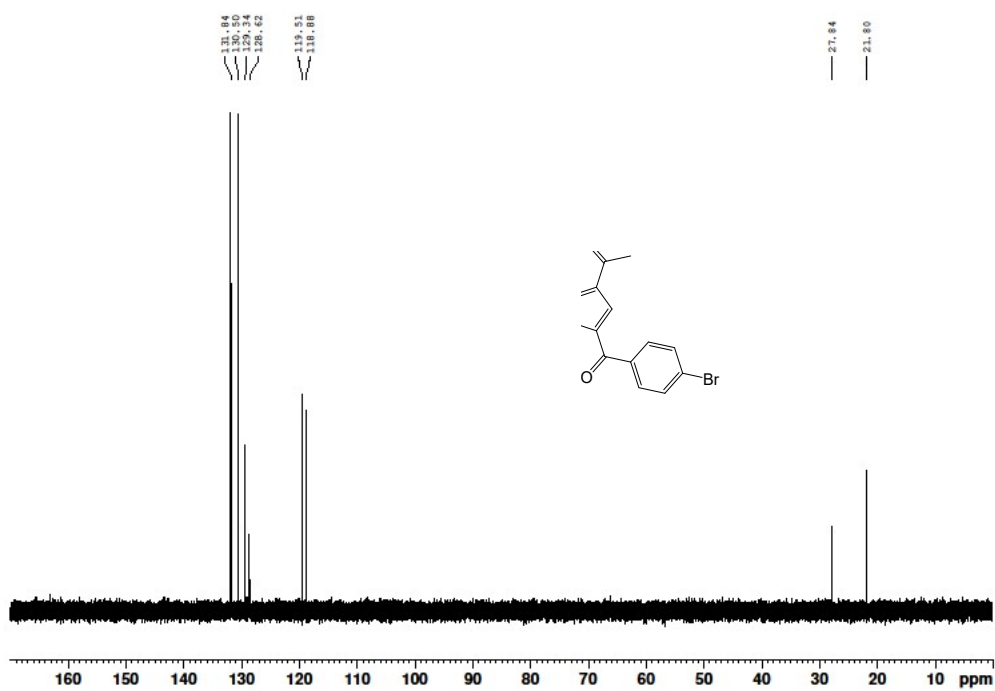

**<sup>1</sup>H NMR (400 MHz, CDCl<sub>3</sub>) -10e**

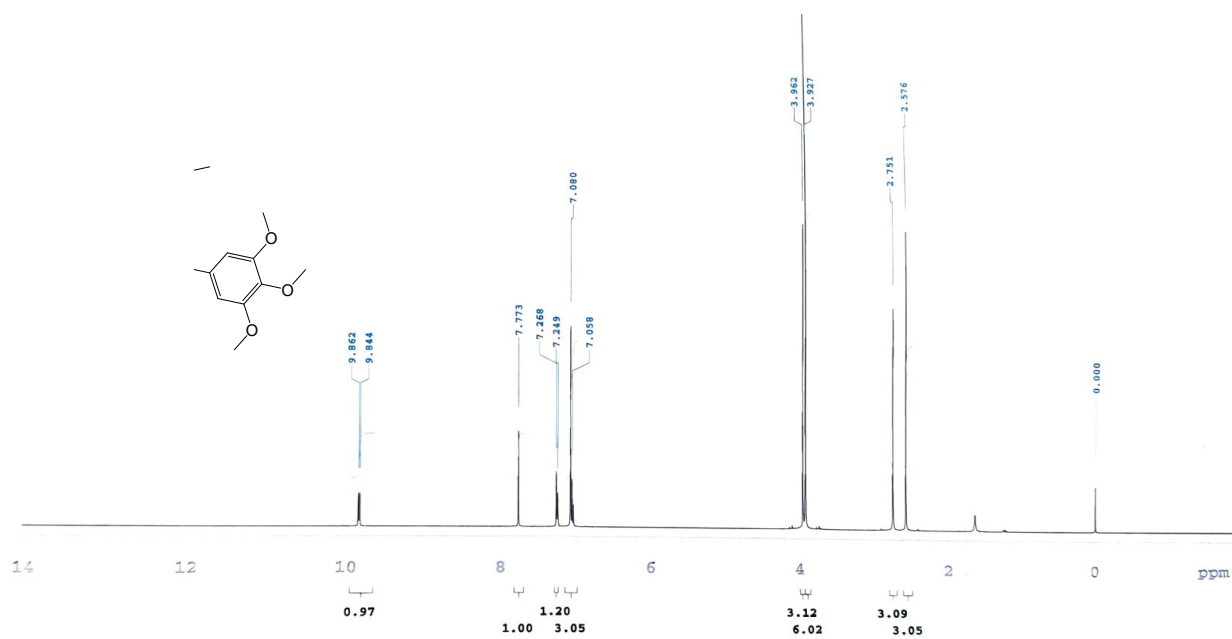

**<sup>13</sup>C NMR (100 MHz, CDCl<sub>3</sub>)**

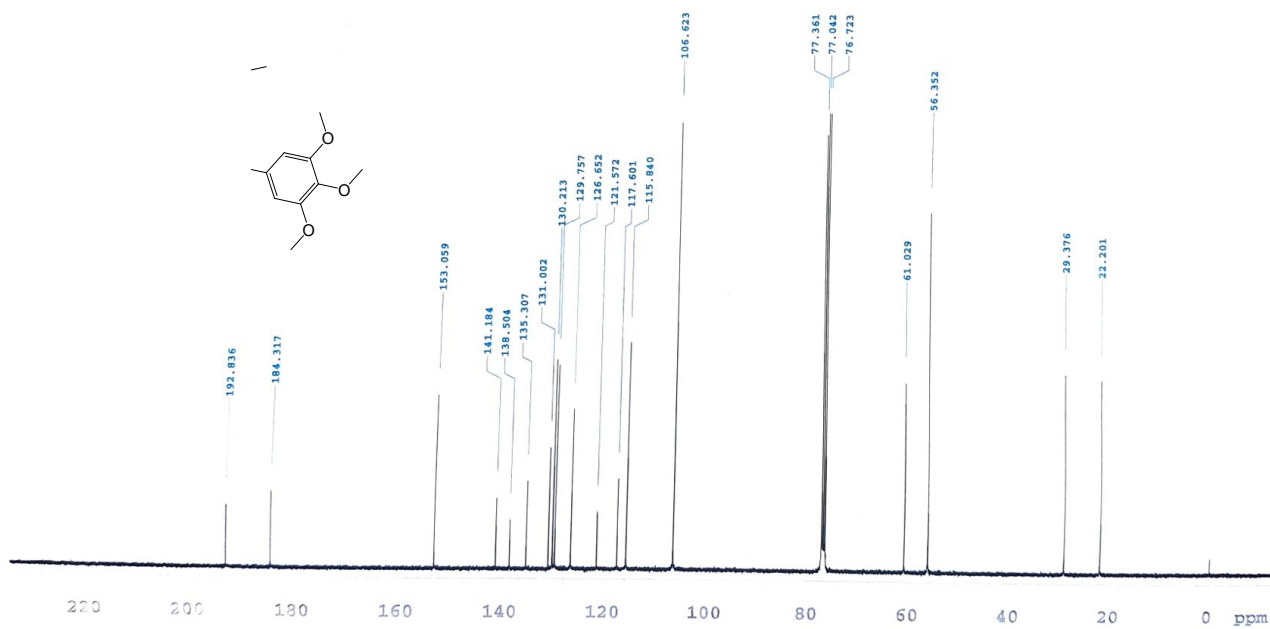

# <sup>13</sup>C-DEPT NMR (100 MHz, CDCl<sub>3</sub>)

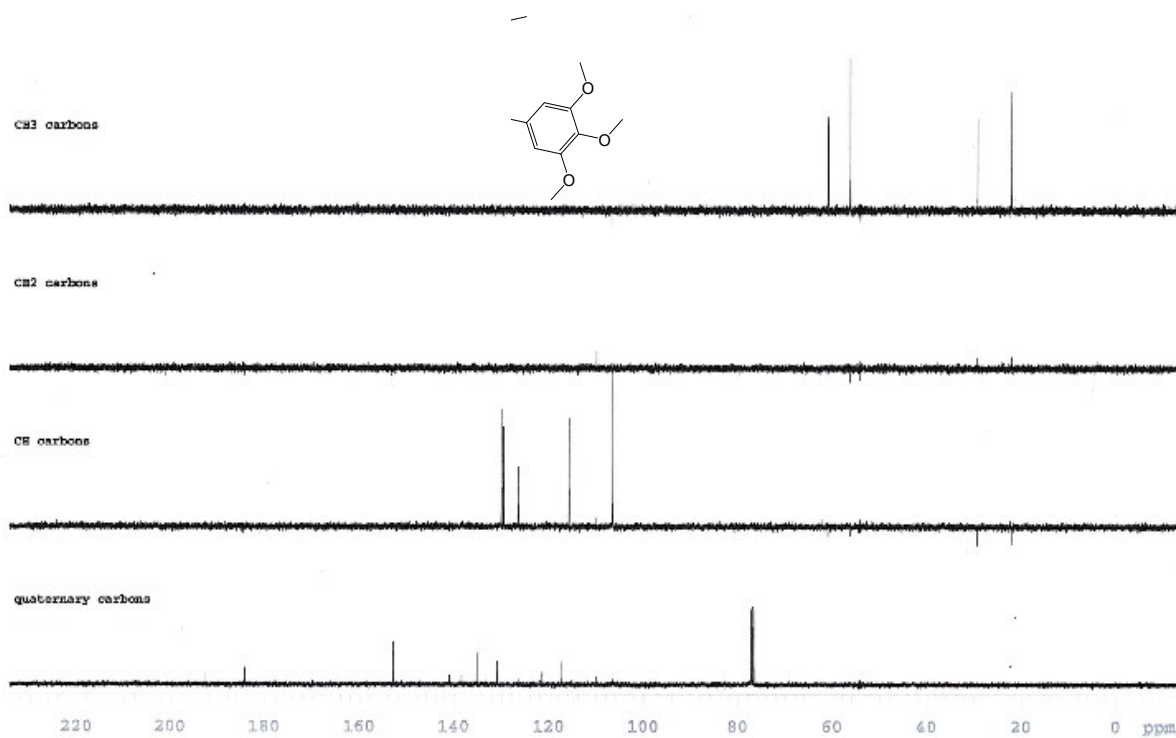

# <sup>1</sup>H NMR (400 MHz, CDCl<sub>3</sub>) -10e'

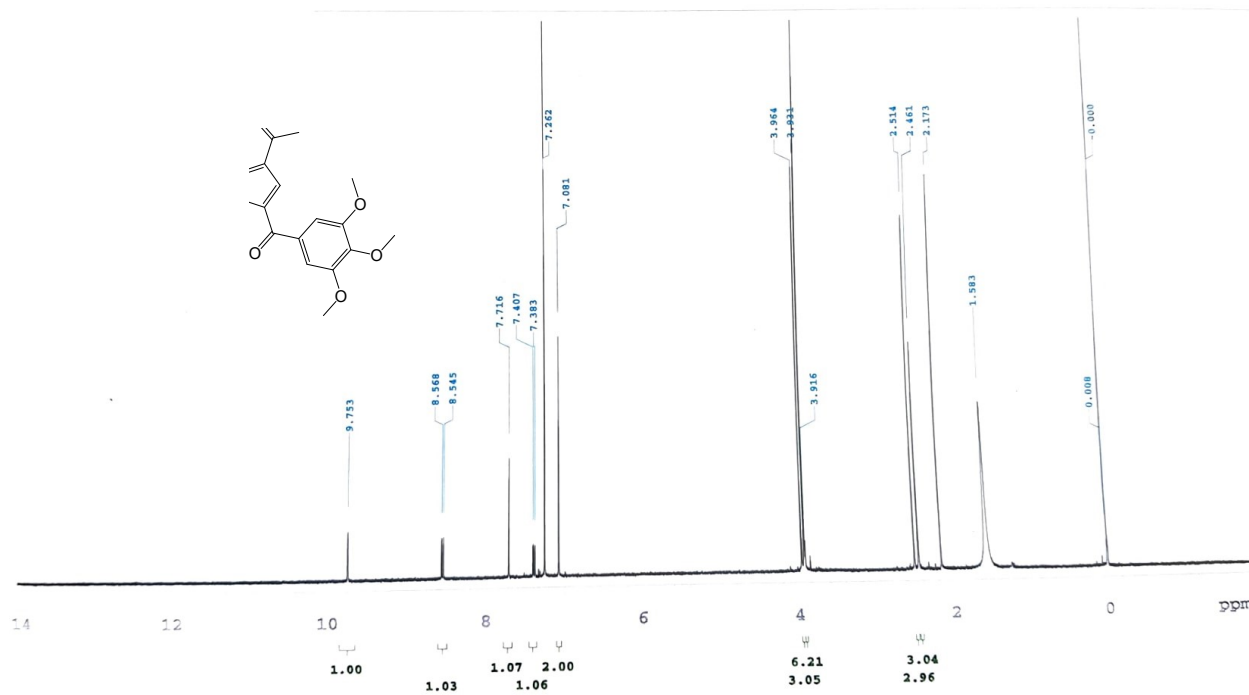

**$^{13}\text{C}$  NMR (100 MHz,  $\text{CDCl}_3$ )**

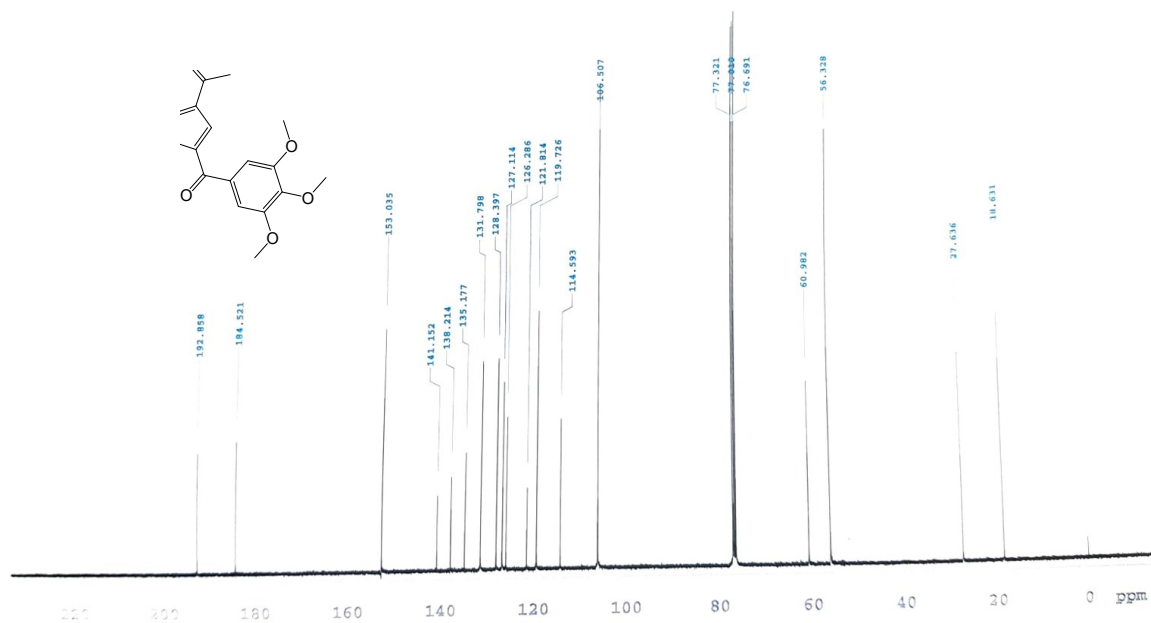

**$^{13}\text{C}$ -DEPT NMR (100 MHz,  $\text{CDCl}_3$ )**

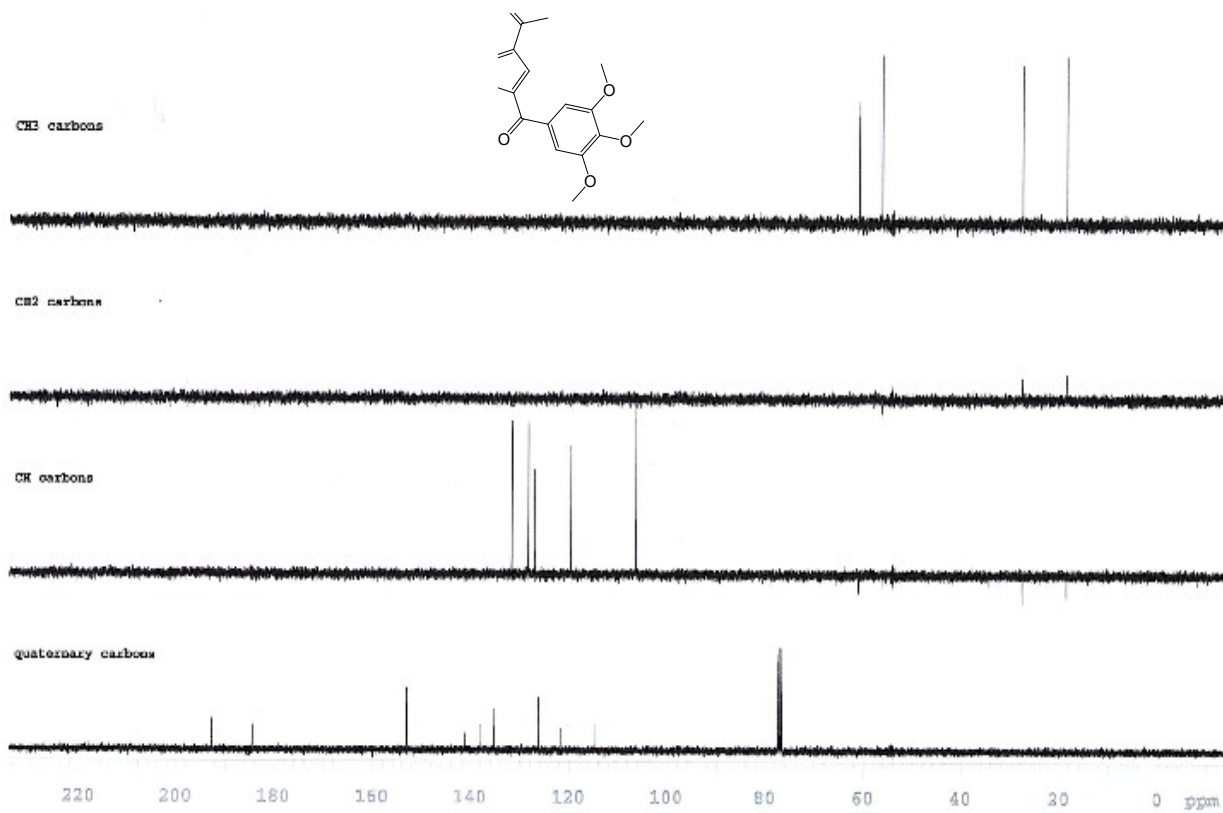



### <sup>13</sup>C-DEPT NMR (125 MHz, CDCl<sub>3</sub>)

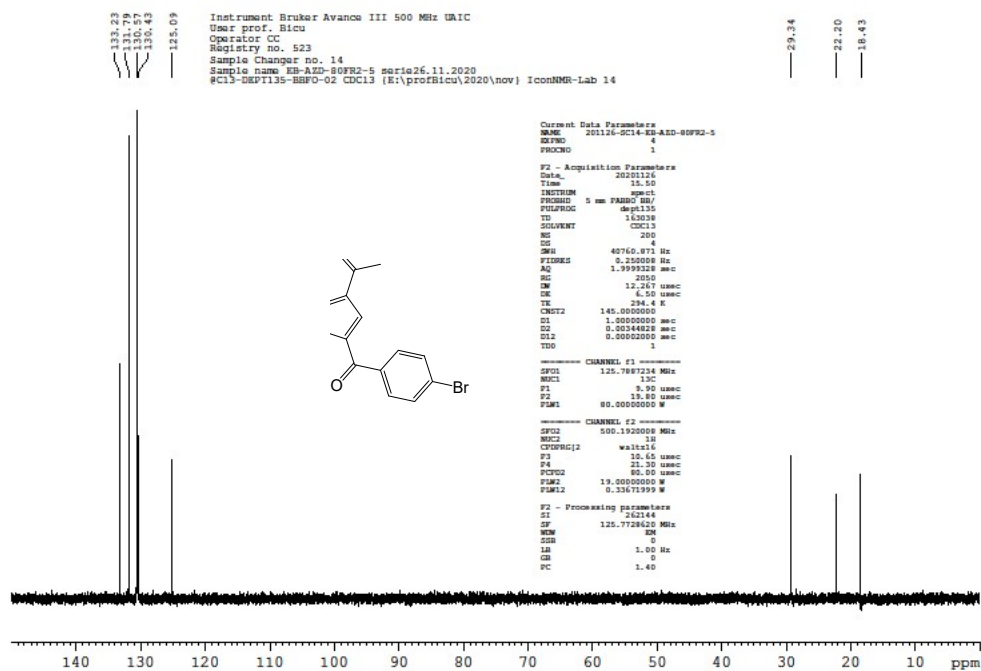

### <sup>1</sup>H NMR (500 MHz, CDCl<sub>3</sub>) -16f

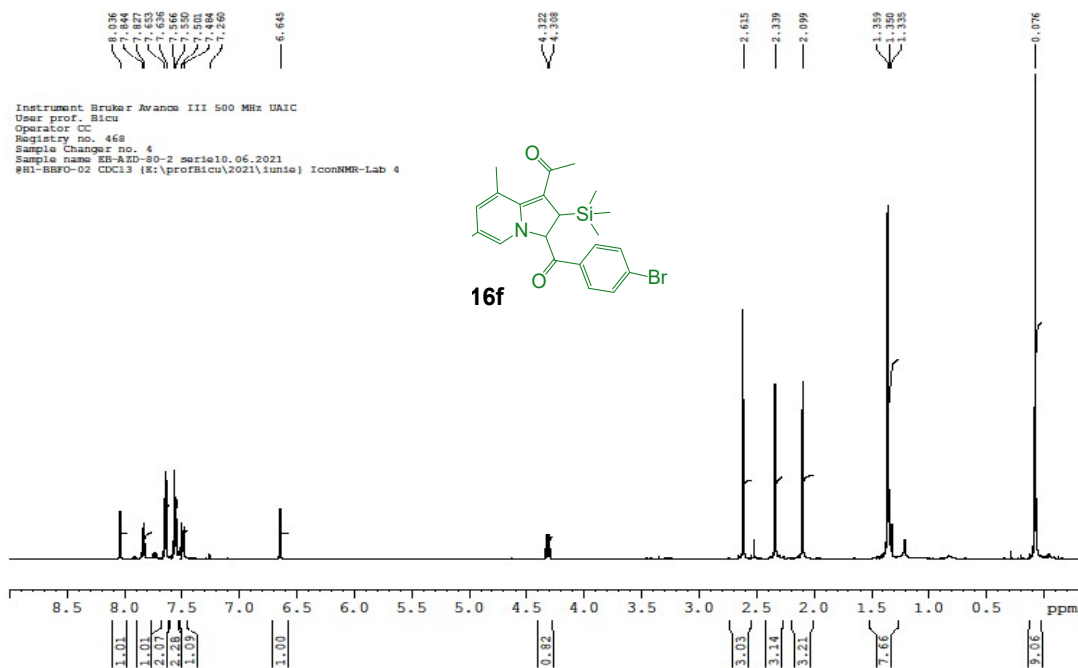

### <sup>13</sup>C NMR (125 MHz, CDCl<sub>3</sub>)

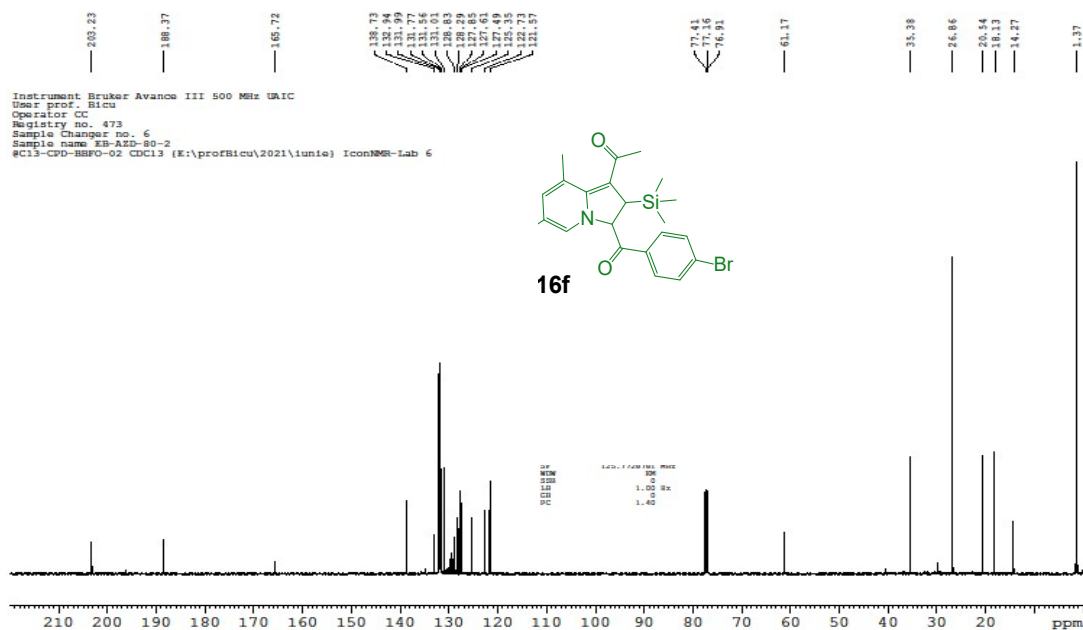

### <sup>13</sup>C-DEPT NMR (125 MHz, CDCl<sub>3</sub>)

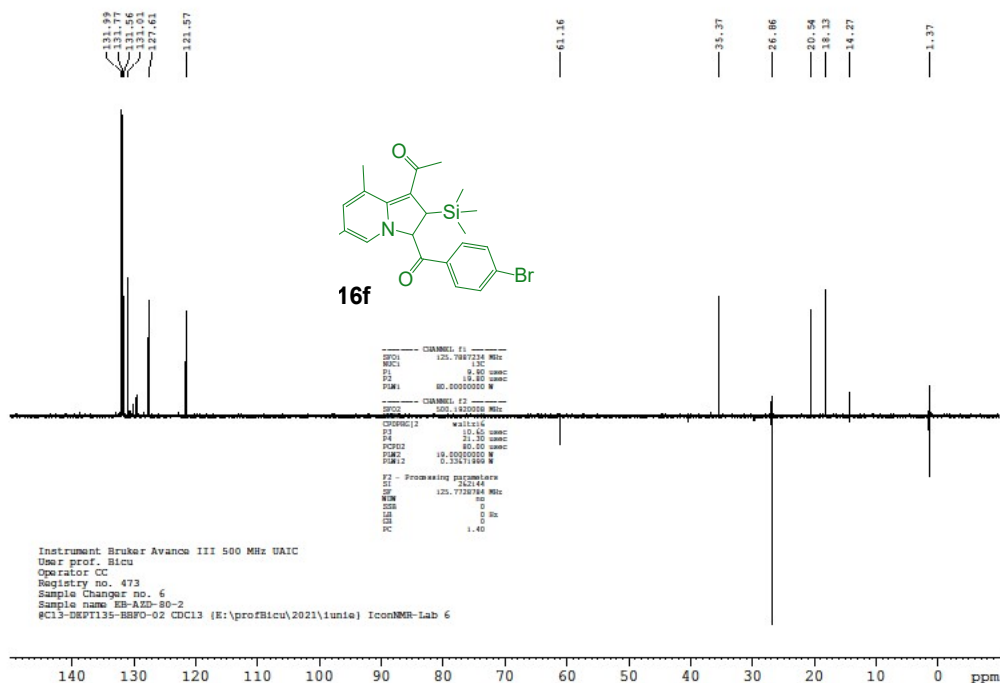

**<sup>1</sup>H NMR (400 MHz, CDCl<sub>3</sub>) -10g**

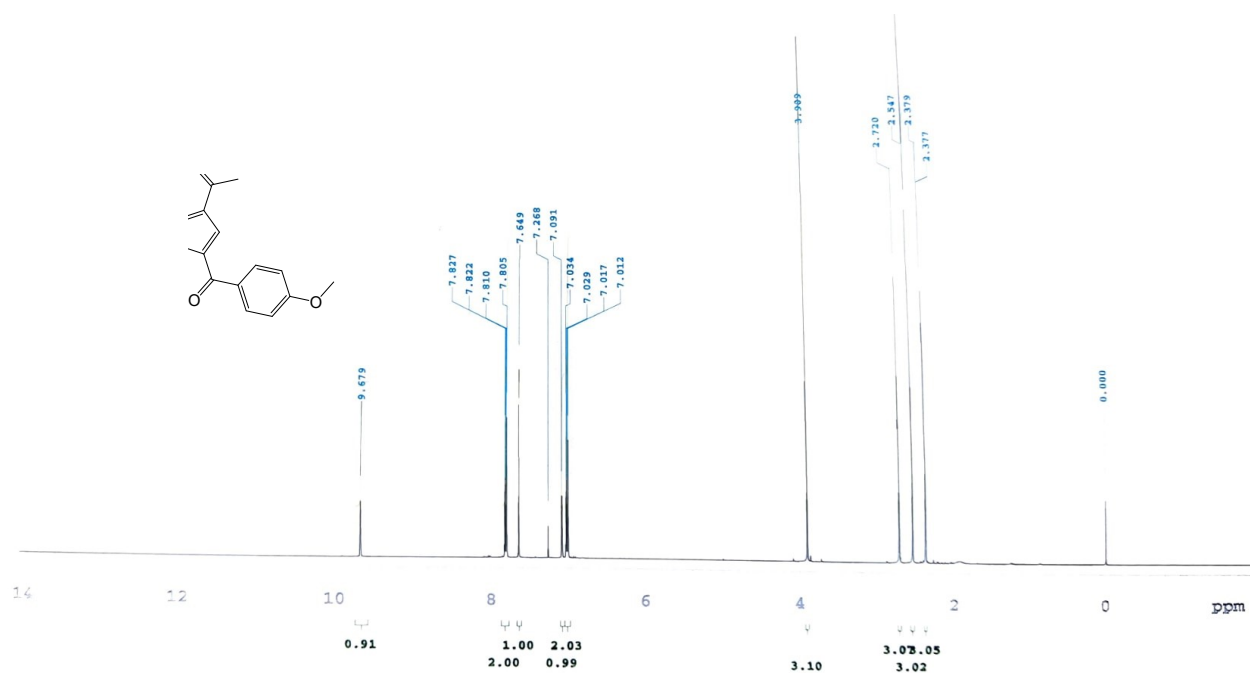

**<sup>13</sup>C NMR (100 MHz, CDCl<sub>3</sub>)**

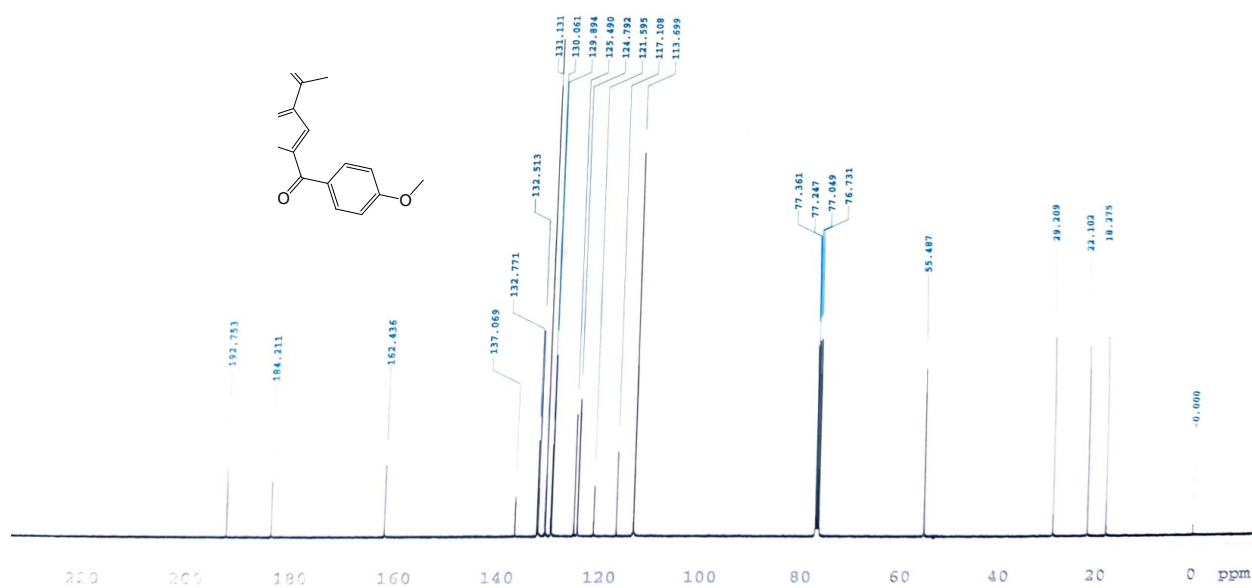



**$^{13}\text{C}$ -DEPT NMR (100 MHz,  $\text{CDCl}_3$ )**

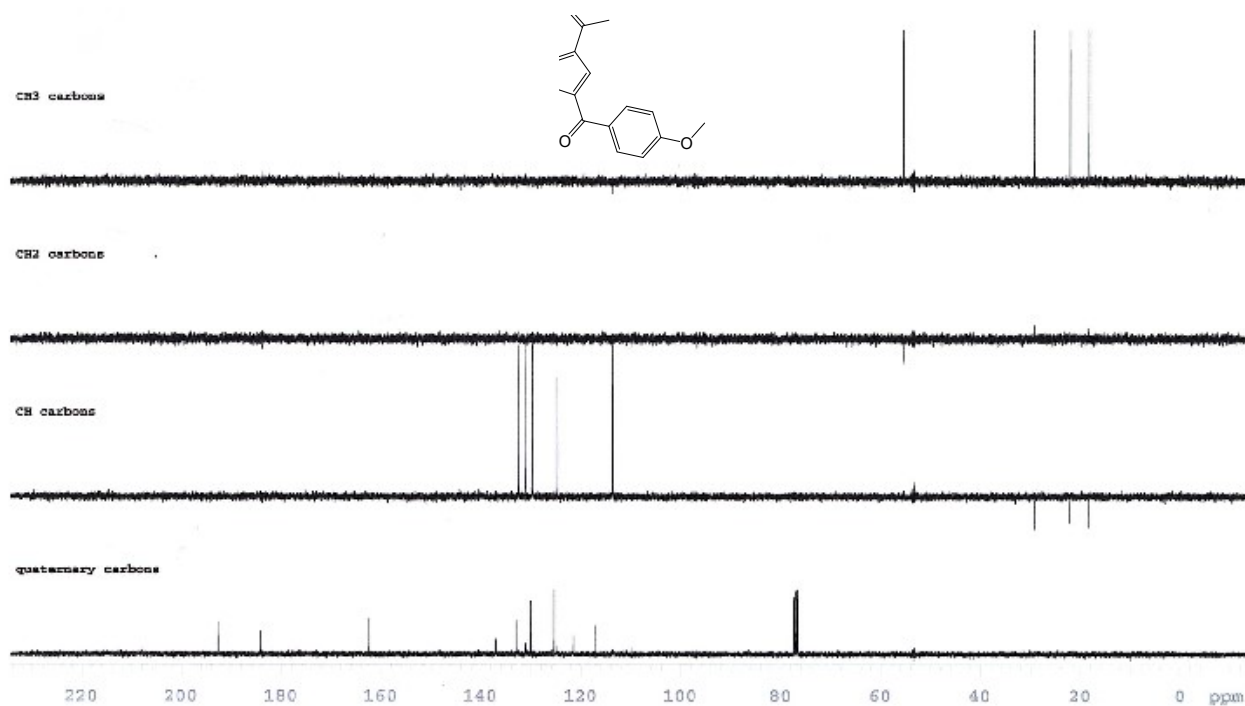

**$^1\text{H}$  NMR (400 MHz,  $\text{CDCl}_3$ ) -14g**

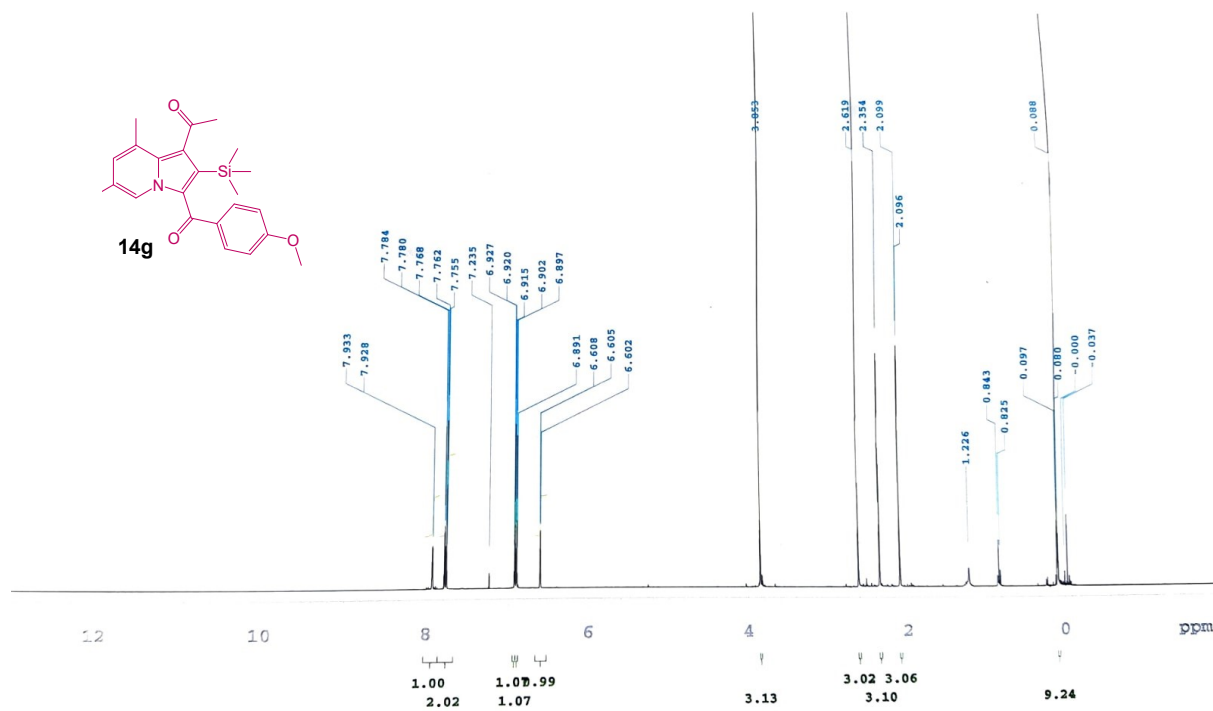



**$^{13}\text{C}$  NMR (100 MHz,  $\text{CDCl}_3$ )**

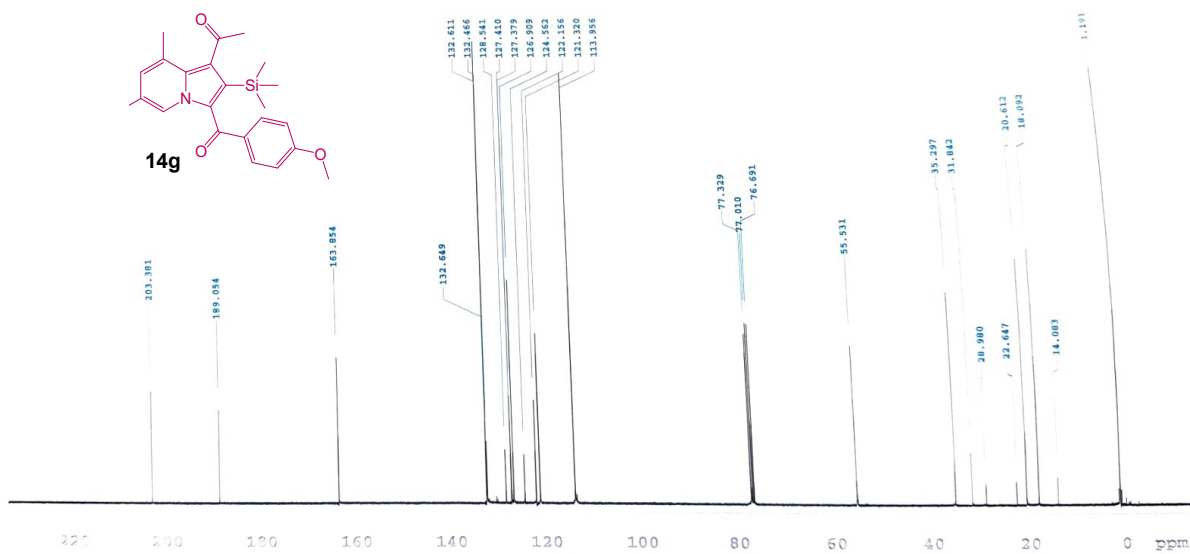

**$^{13}\text{C}$ -DEPT NMR (100 MHz,  $\text{CDCl}_3$ )**

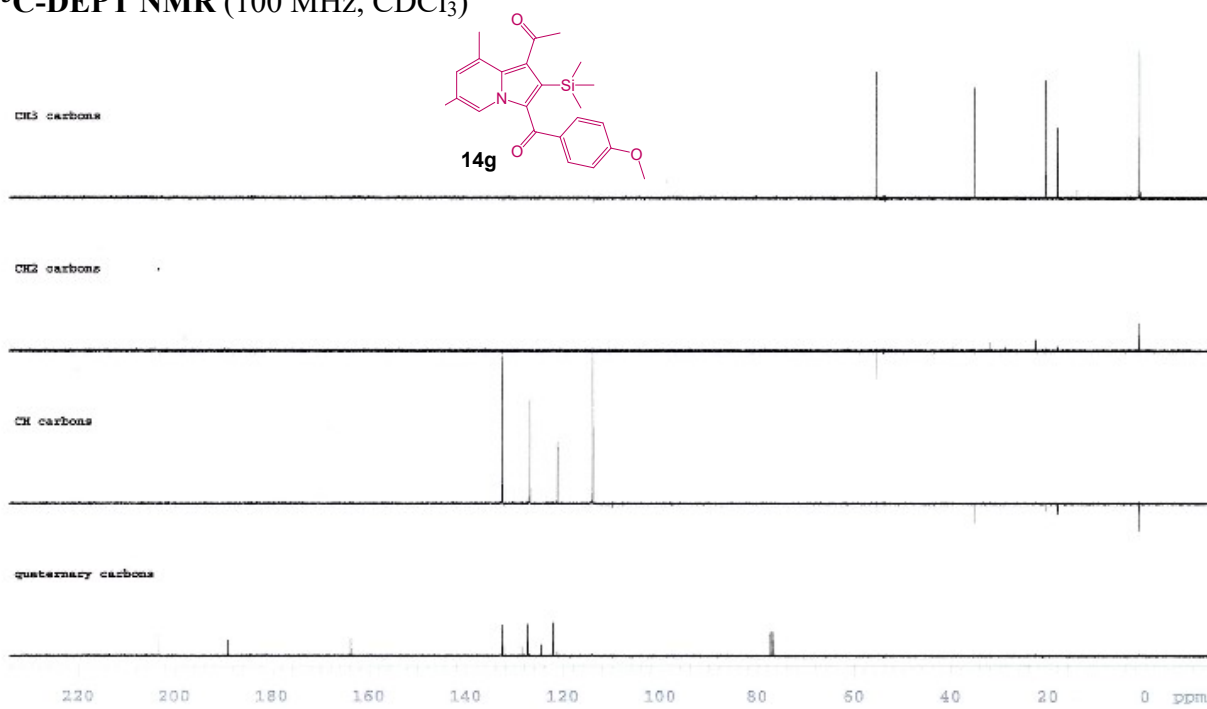

# <sup>1</sup>H NMR (500 MHz, CDCl<sub>3</sub>) -10h

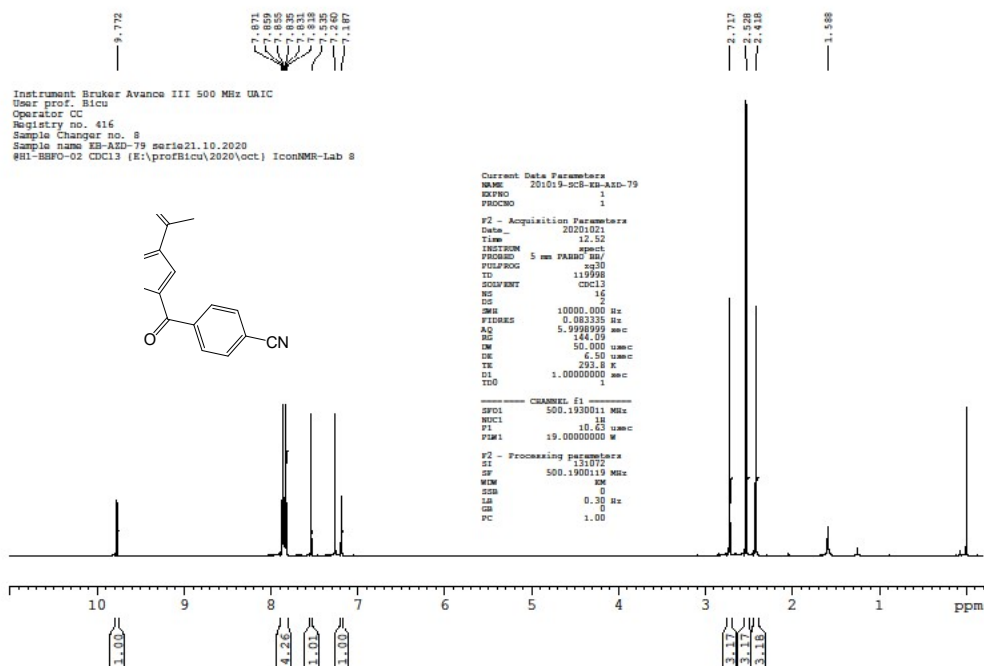

# <sup>13</sup>C NMR (125 MHz, CDCl<sub>3</sub>)

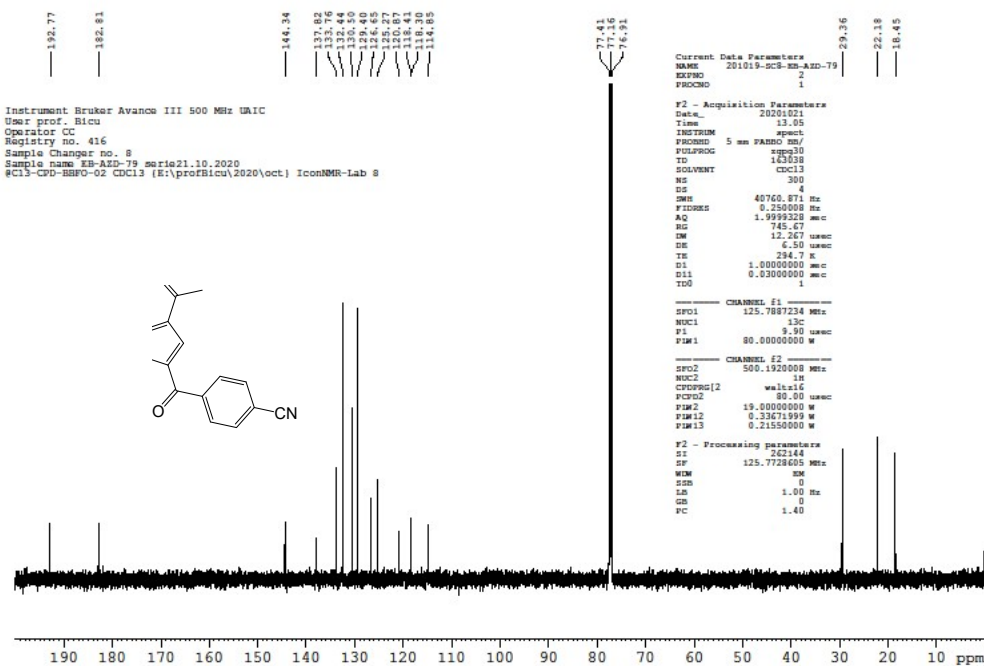

# <sup>13</sup>C-DEPT NMR (125 MHz, CDCl<sub>3</sub>)

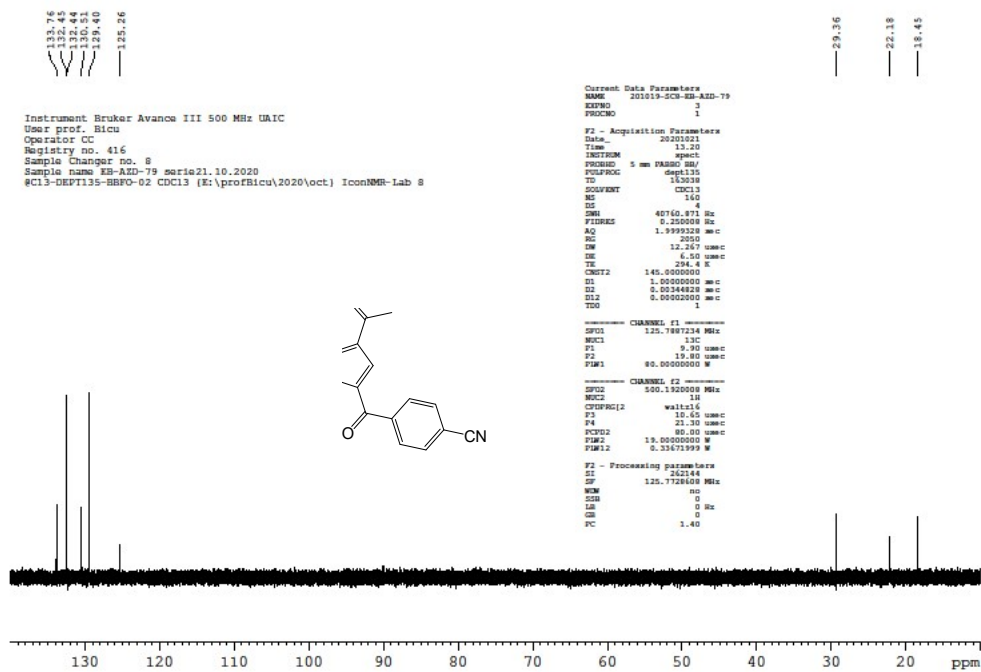

# <sup>1</sup>H NMR (500 MHz, CDCl<sub>3</sub>) -14h

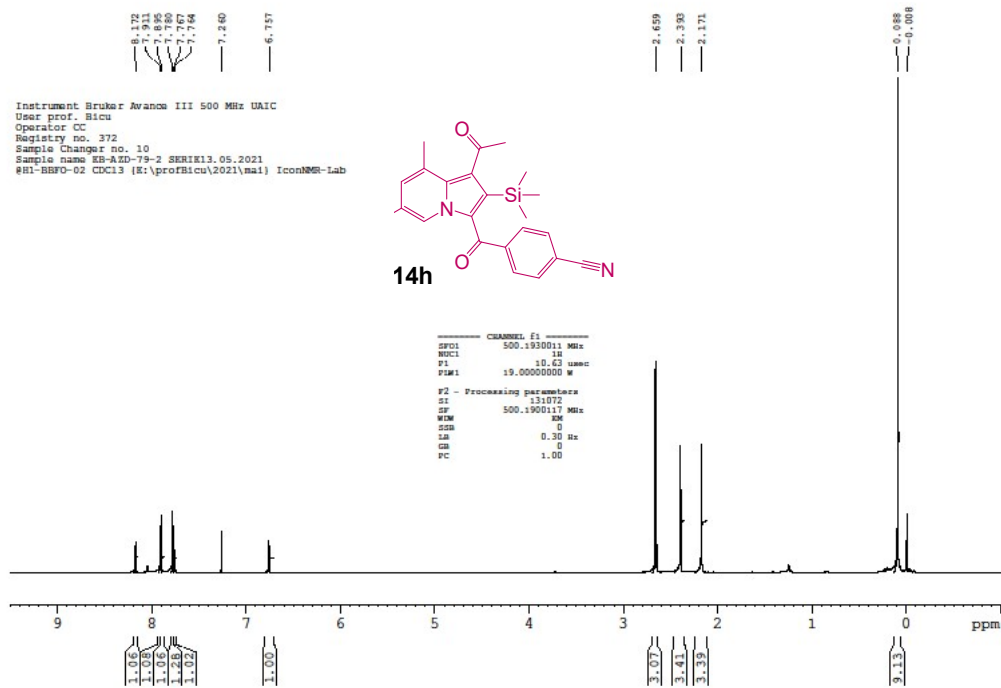

### <sup>13</sup>C NMR (125 MHz, CDCl<sub>3</sub>)

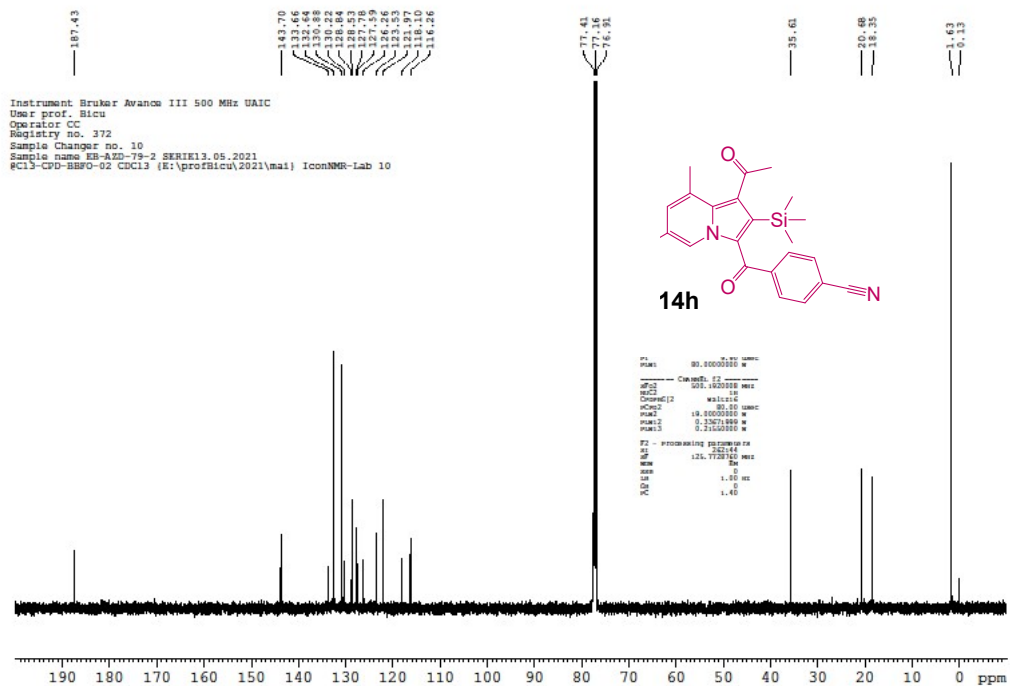

### <sup>13</sup>C-DEPT NMR (125 MHz, CDCl<sub>3</sub>)

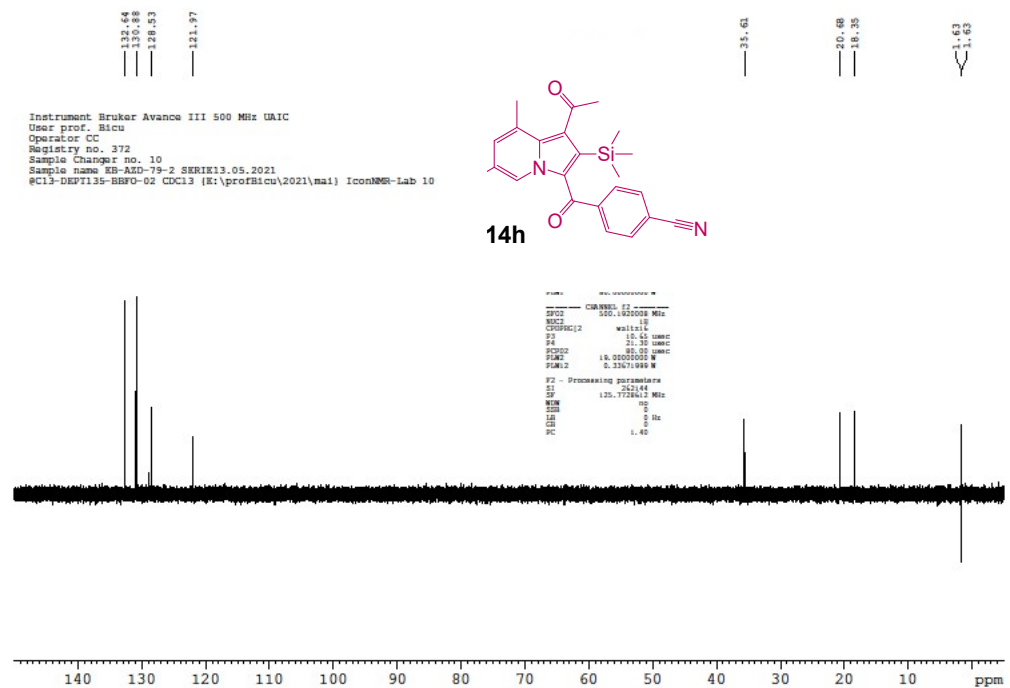

# <sup>1</sup>H NMR (500 MHz, CDCl<sub>3</sub>) -10i

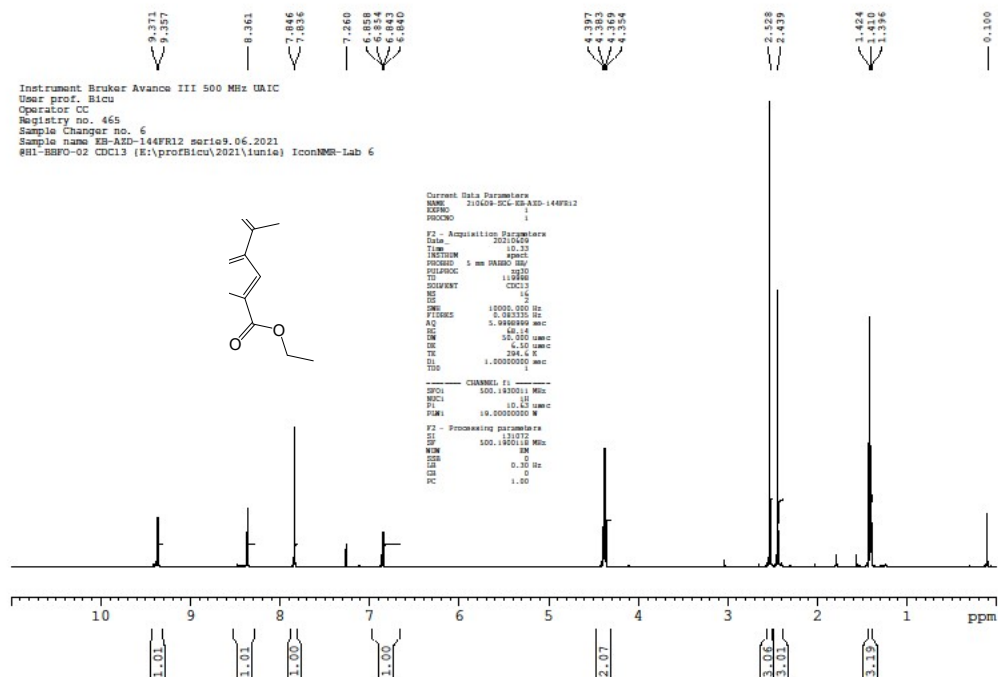

# <sup>13</sup>C NMR (125 MHz, CDCl<sub>3</sub>)

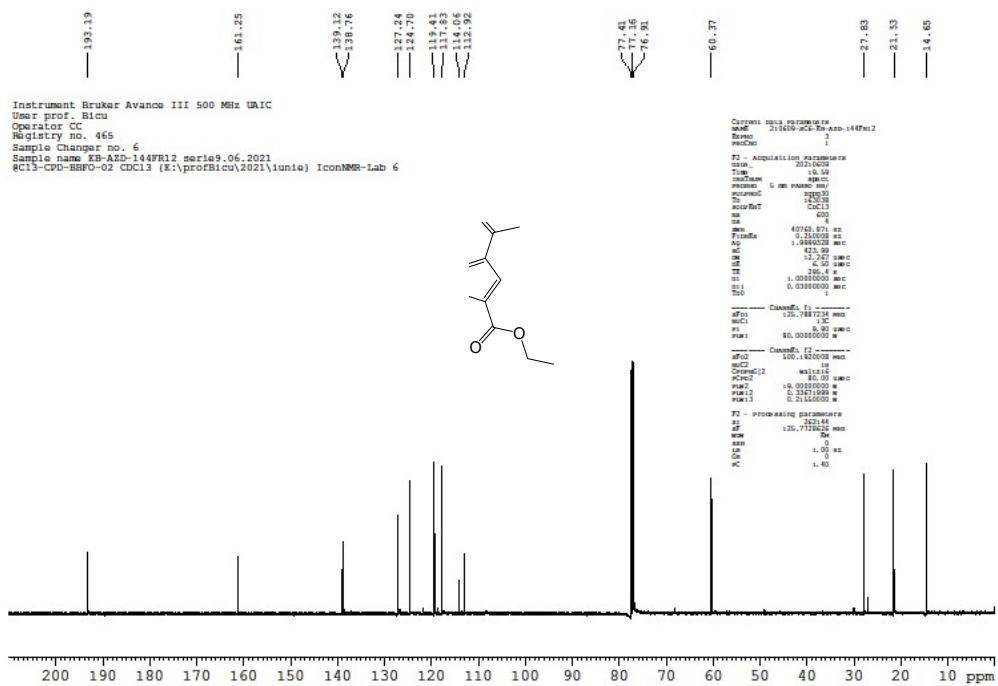

### <sup>13</sup>C-DEPT NMR (125 MHz, CDCl<sub>3</sub>)

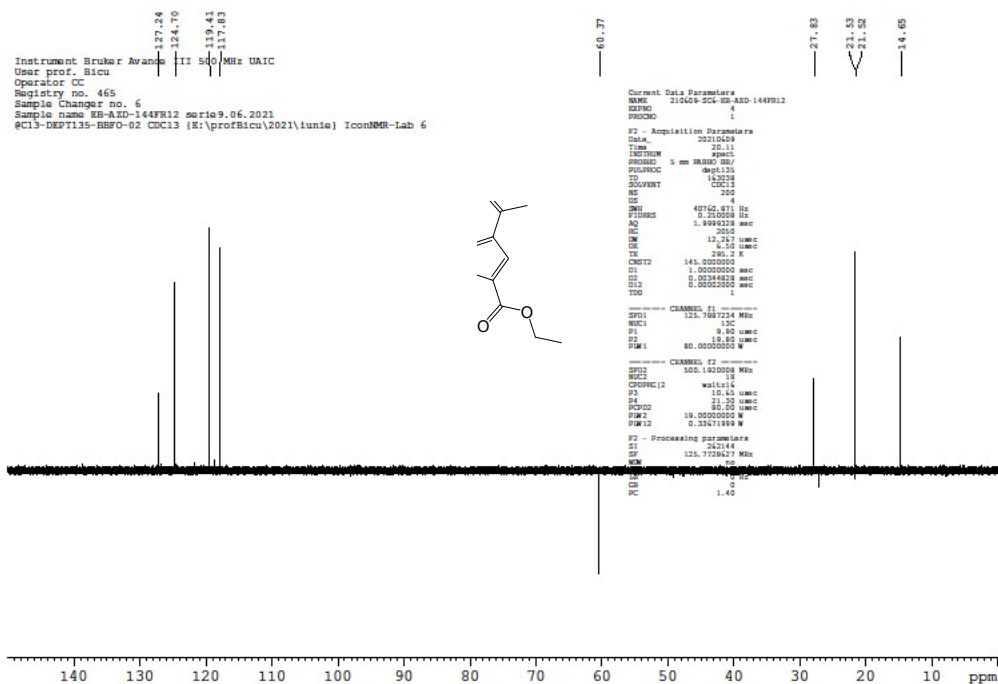

### <sup>1</sup>H NMR (500 MHz, CDCl<sub>3</sub>) -15i

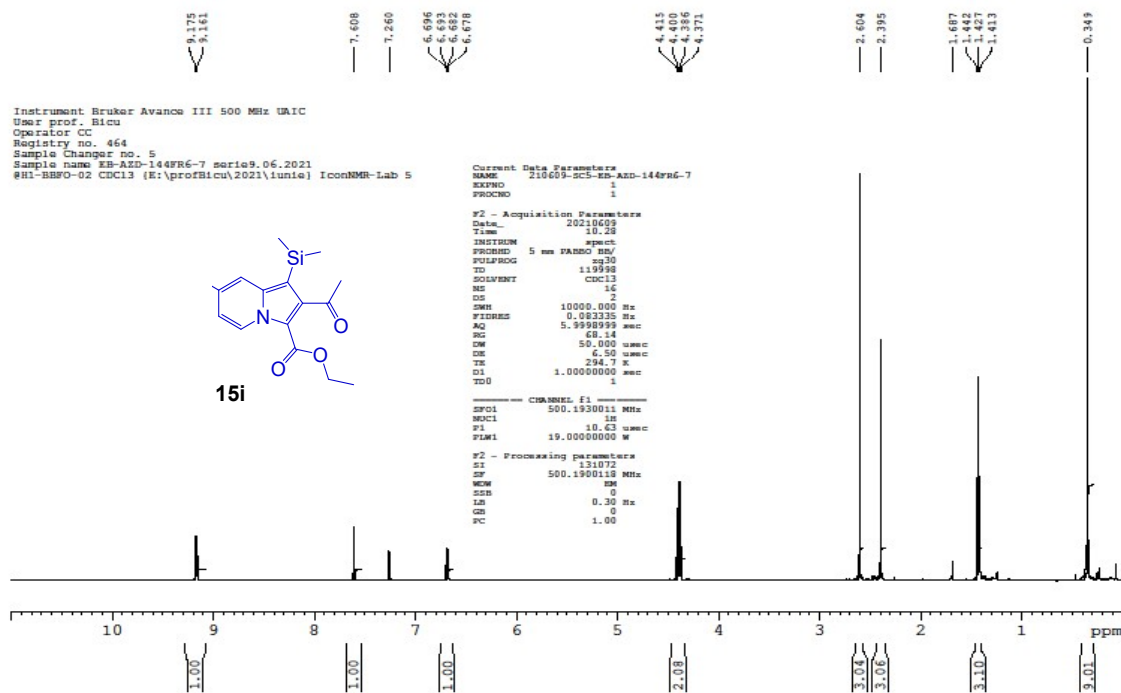





**<sup>1</sup>H NMR (400 MHz, CDCl<sub>3</sub>) -10j**

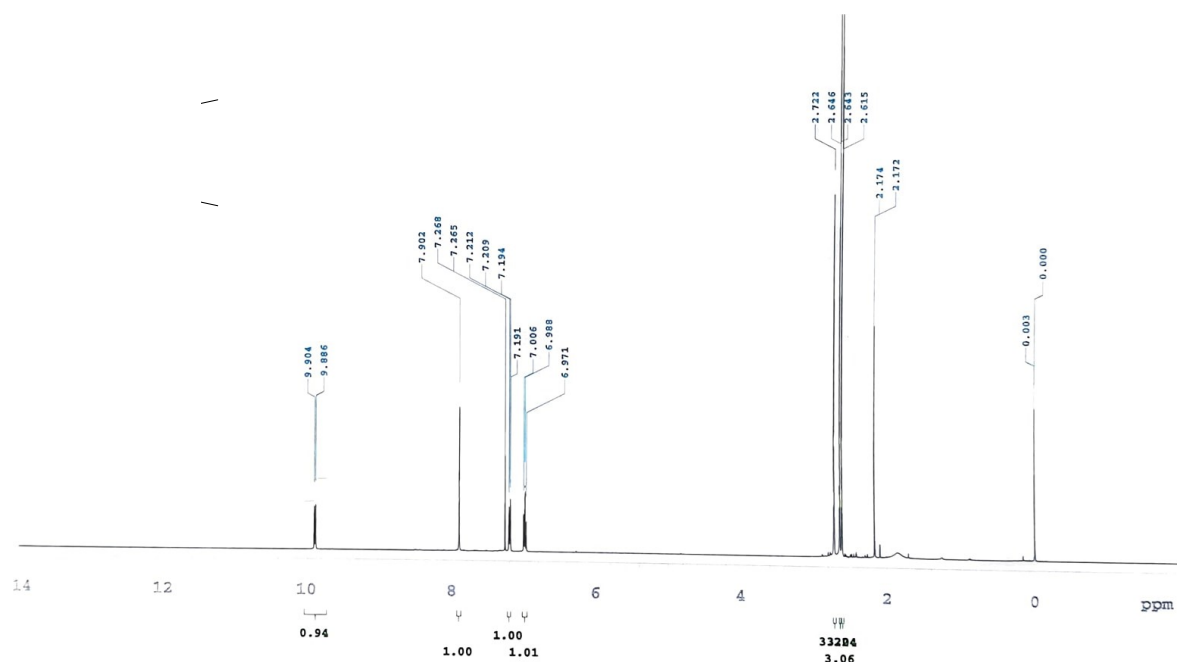

**<sup>13</sup>C NMR (100 MHz, CDCl<sub>3</sub>)**

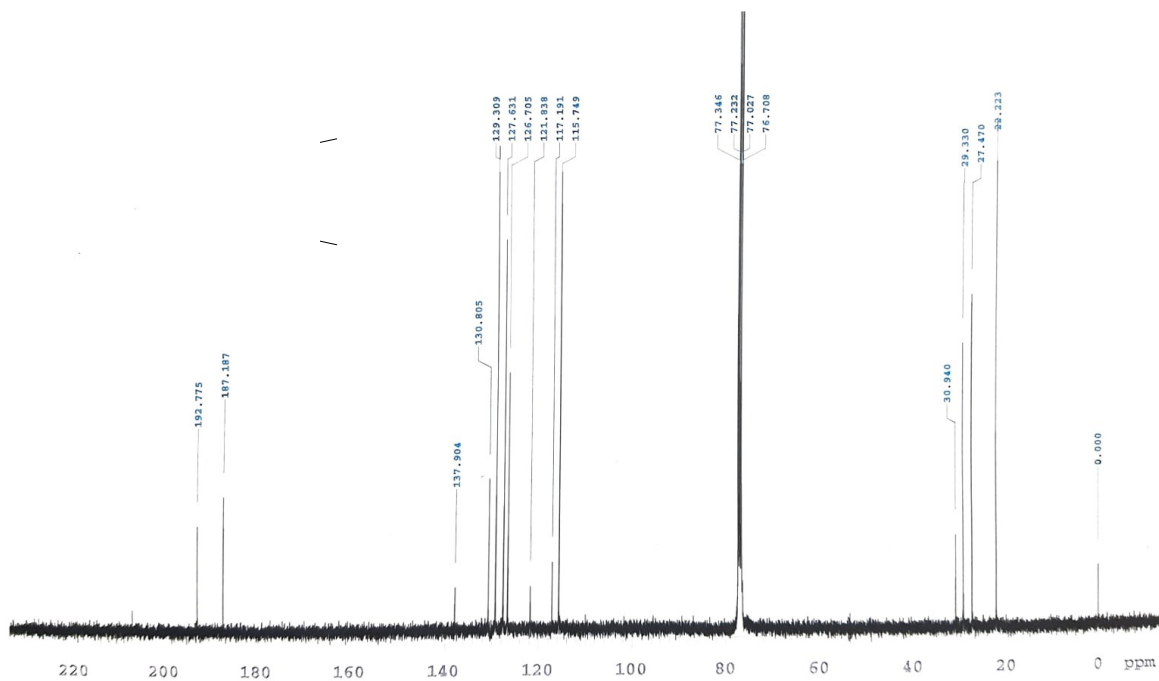

### $^{13}\text{C}$ -DEPT NMR (100 MHz, $\text{CDCl}_3$ )

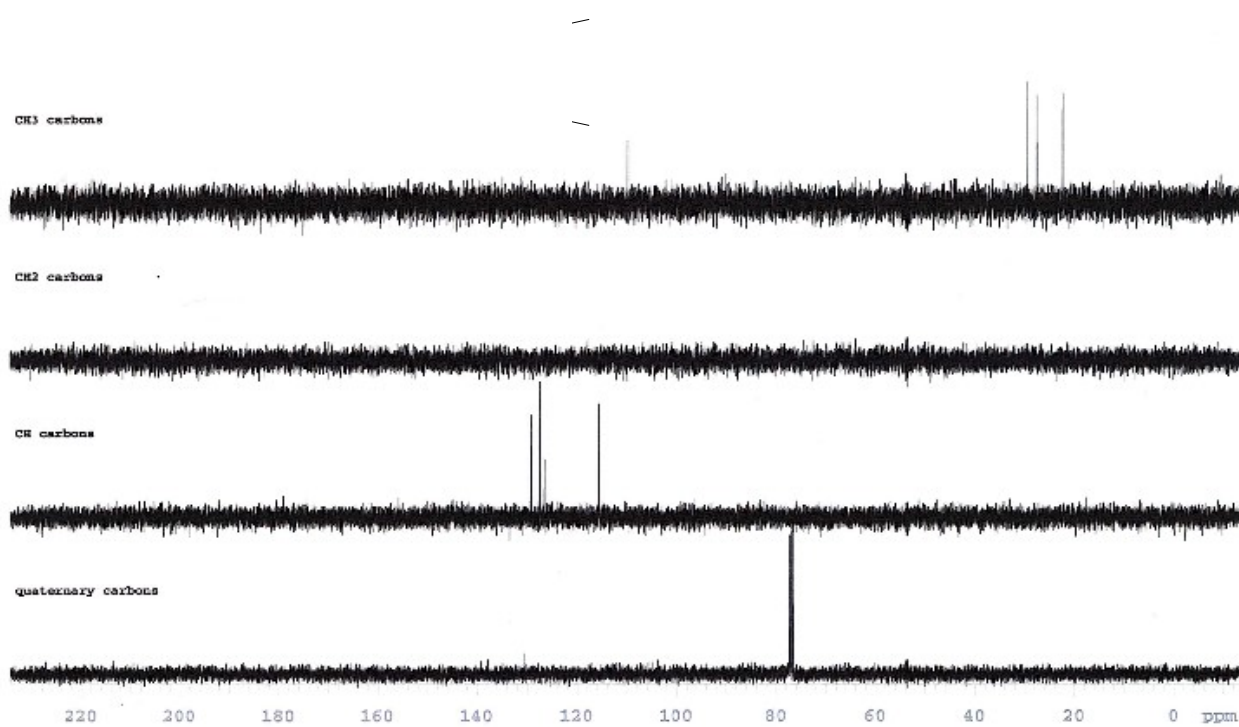

### $^1\text{H}$ NMR (400 MHz, $\text{CDCl}_3$ ) -10j'

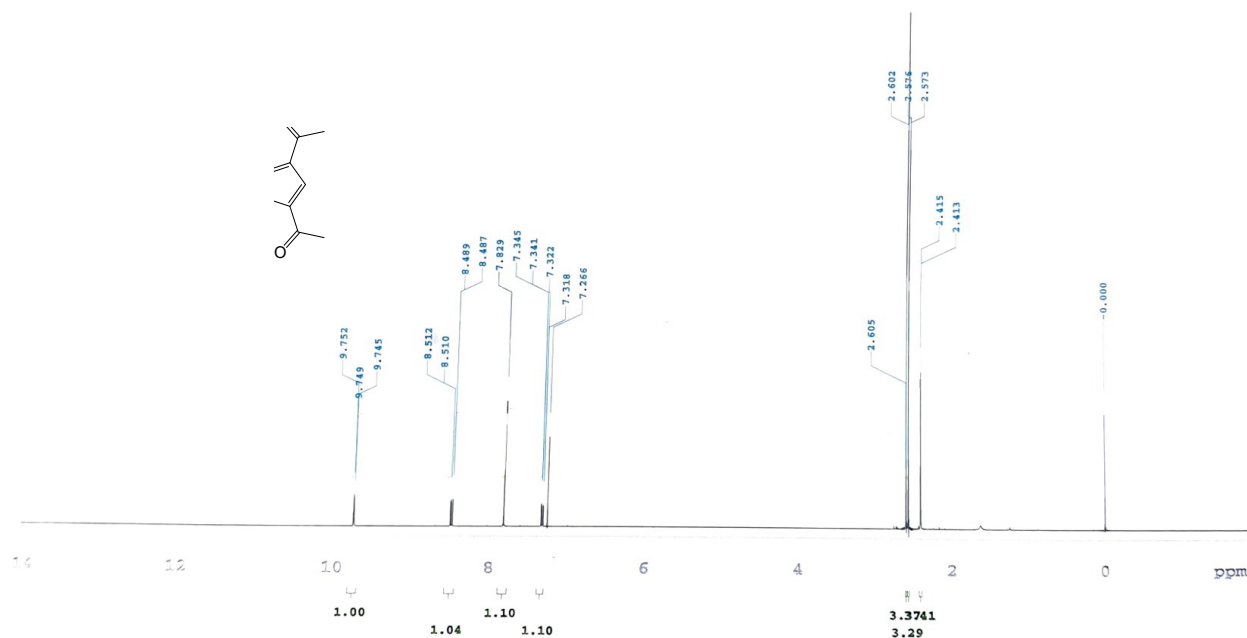



### $^{13}\text{C}$ NMR (100 MHz, $\text{CDCl}_3$ )

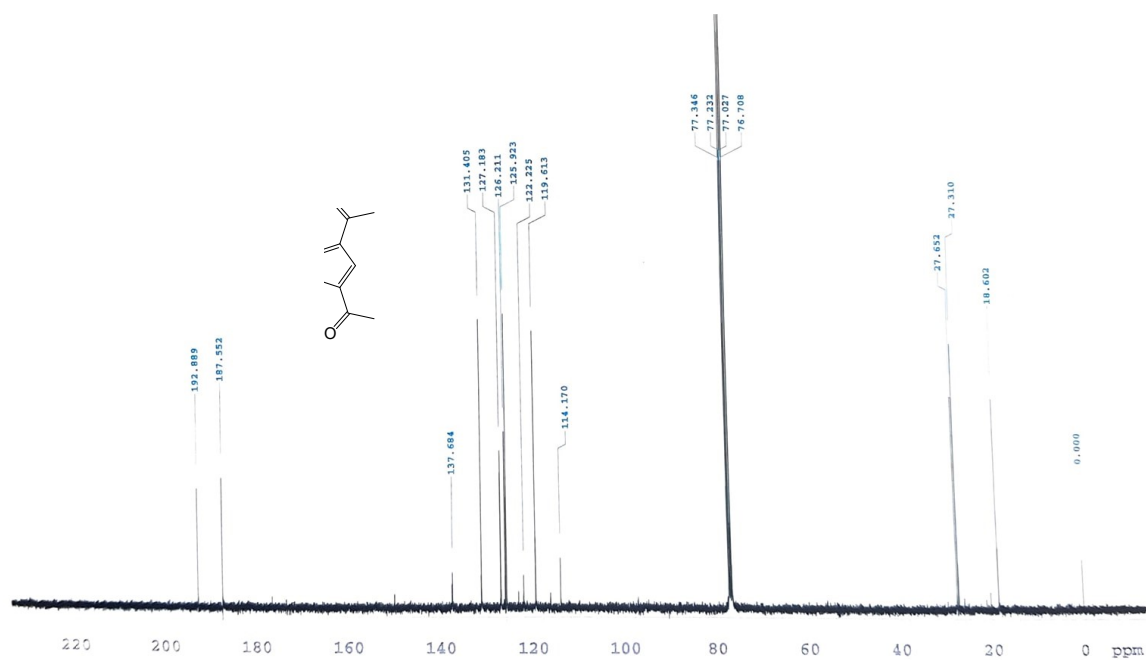

### $^1\text{H}$ NMR (500 MHz, $\text{CDCl}_3$ ) -10k

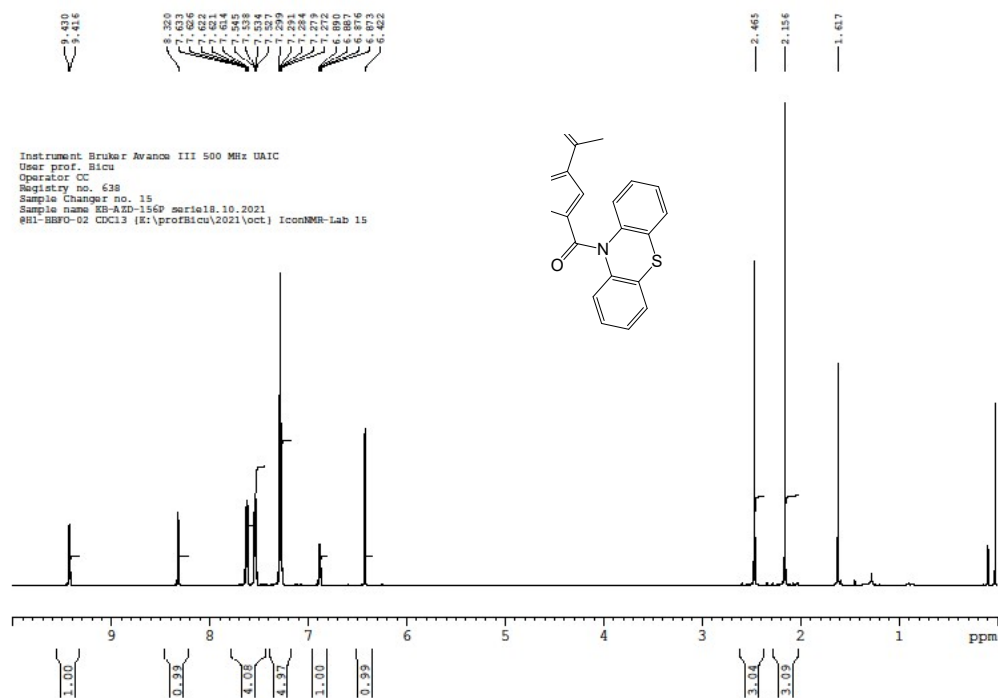

### <sup>13</sup>C NMR (125 MHz, CDCl<sub>3</sub>)

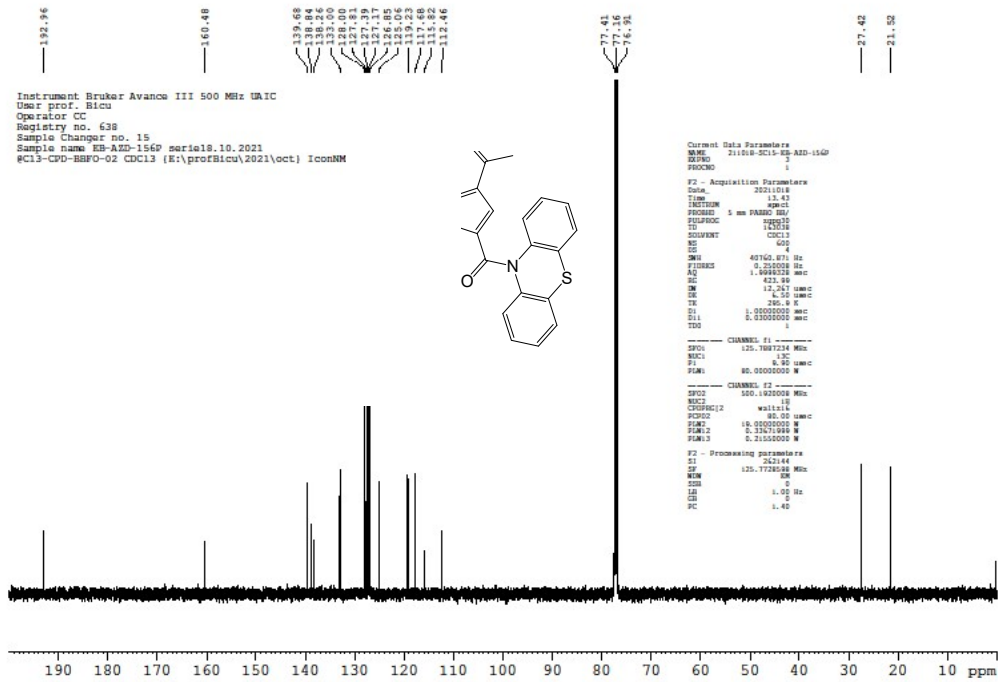

### <sup>13</sup>C-DEPT NMR (125 MHz, CDCl<sub>3</sub>)

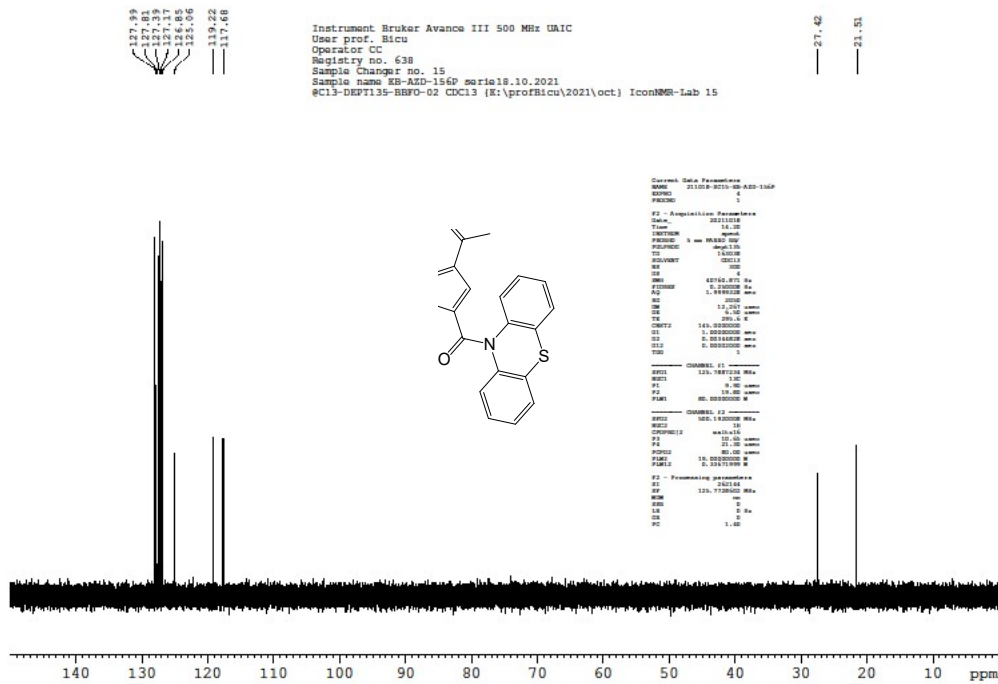

**<sup>1</sup>H NMR (400 MHz, CDCl<sub>3</sub>) -10I**

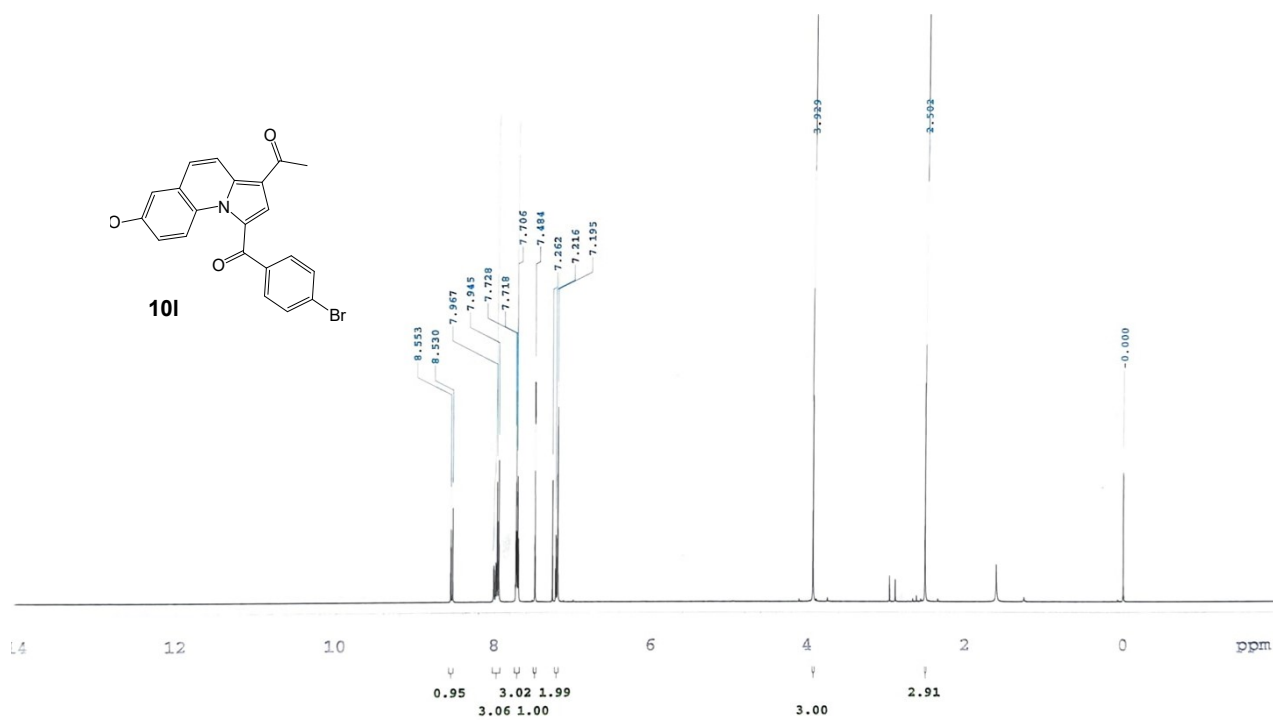

**<sup>13</sup>C NMR (100 MHz, CDCl<sub>3</sub>)**

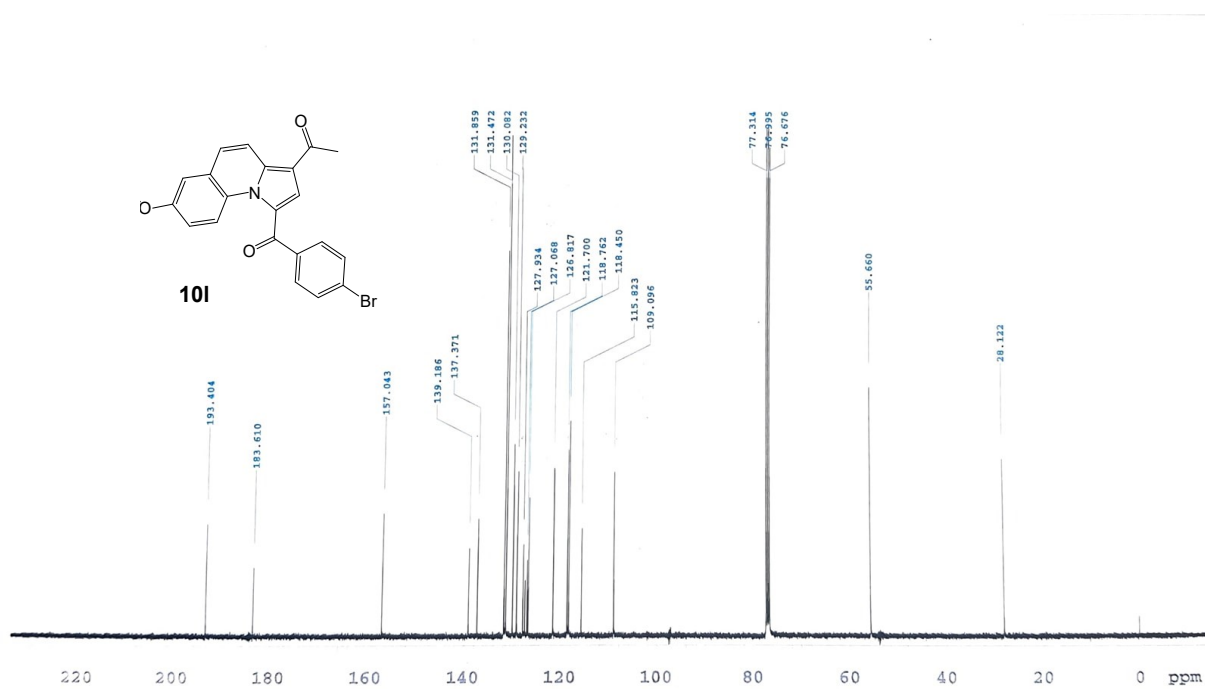

**$^{13}\text{C}$ -DEPT NMR (100 MHz,  $\text{CDCl}_3$ )**

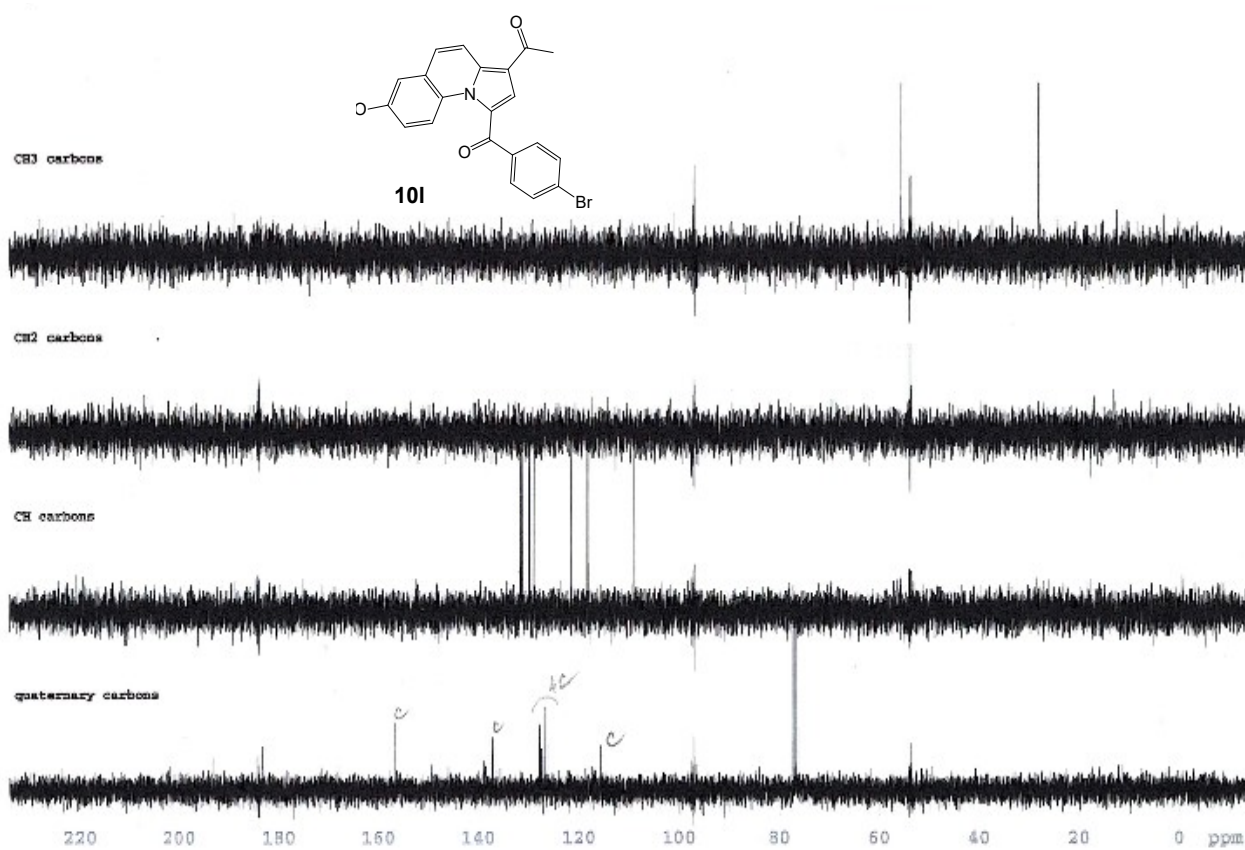

**$^1\text{H}$  NMR (500 MHz,  $\text{DMSO-d}_6$ ) -10m**



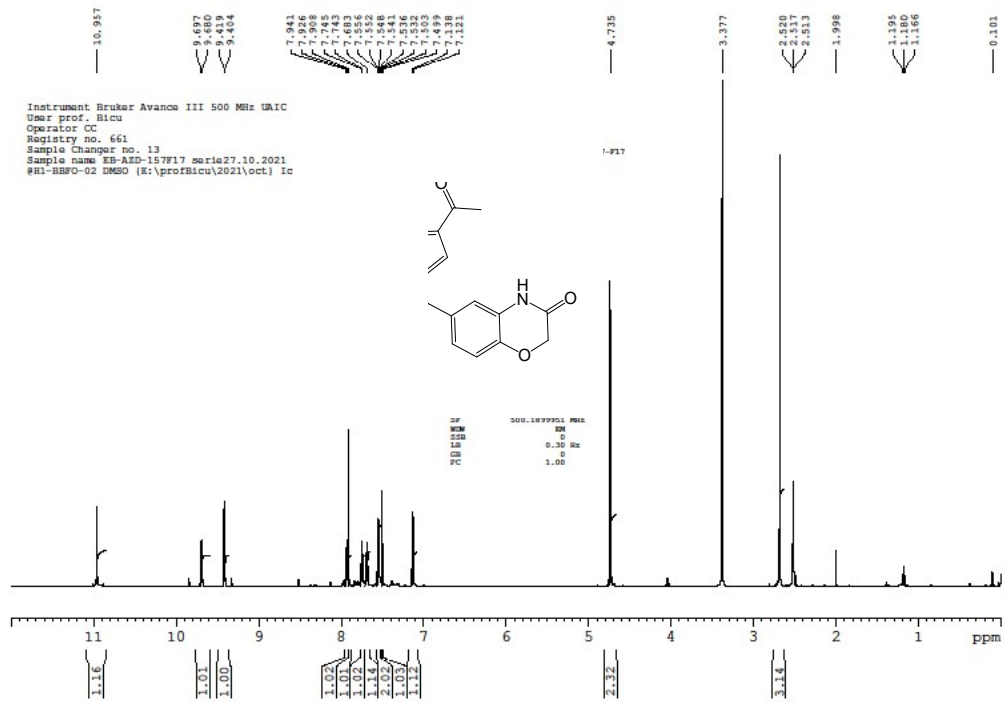

**<sup>13</sup>C NMR (125 MHz, DMSO-d<sub>6</sub>)**

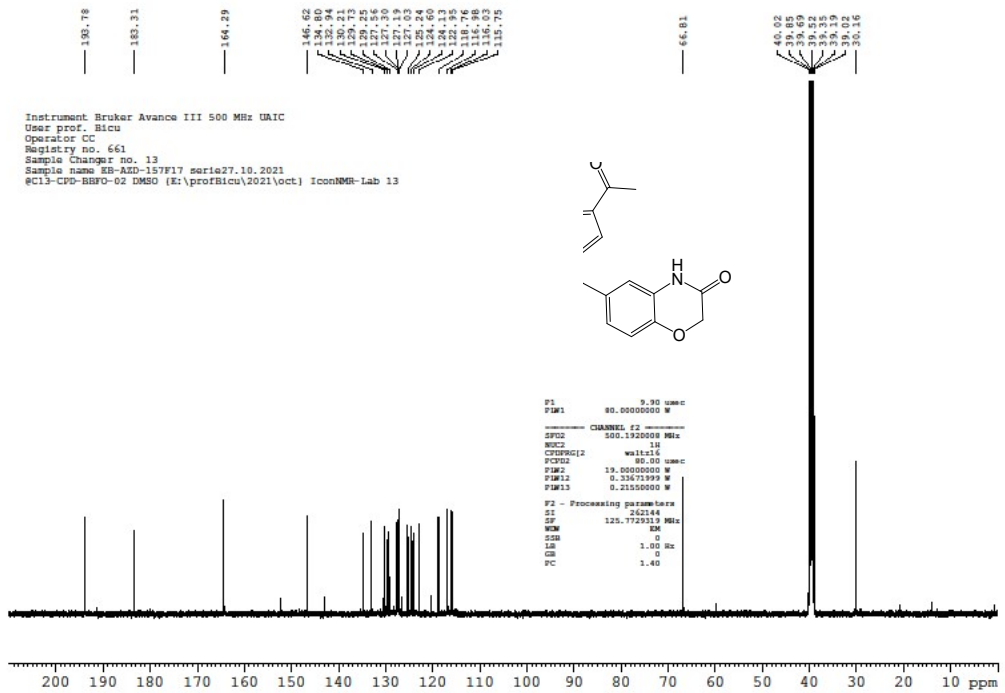

**<sup>13</sup>C-DEPT NMR (125 MHz, DMSO-d<sub>6</sub>)**

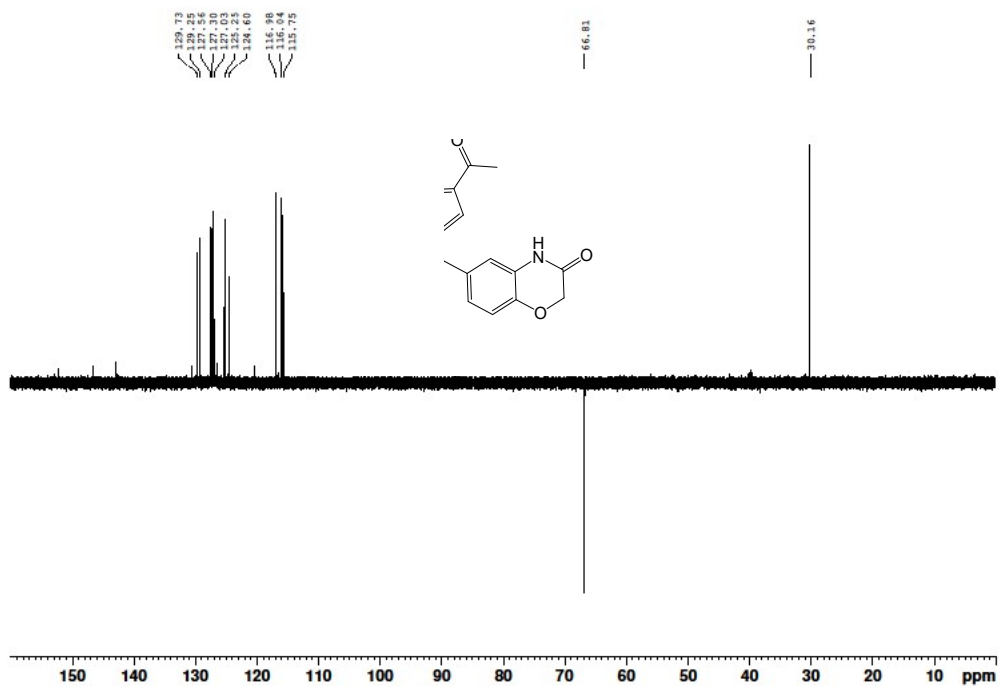

# <sup>1</sup>H NMR (500 MHz, CDCl<sub>3</sub>) -14m

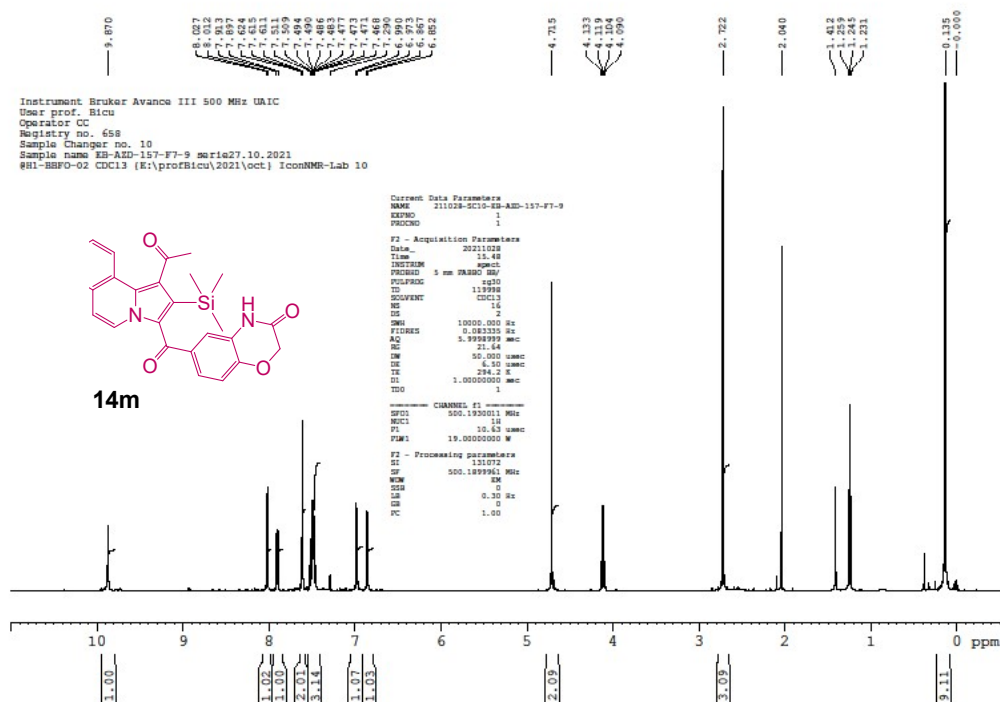

# <sup>13</sup>C NMR (125 MHz, CDCl<sub>3</sub>)

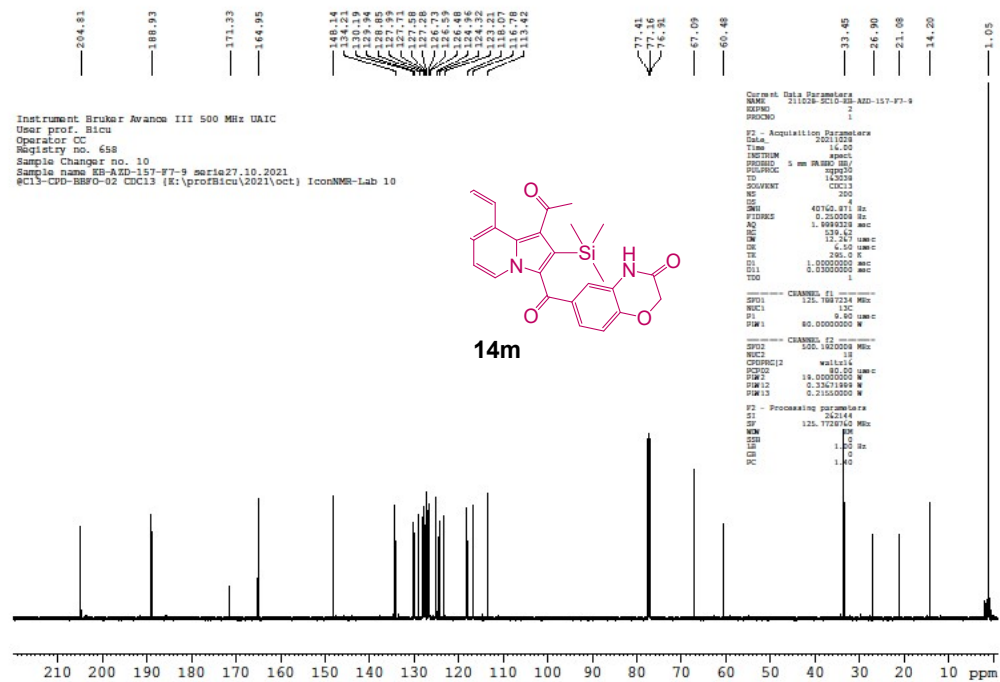

# <sup>13</sup>C-DEPT NMR (125 MHz, CDCl<sub>3</sub>)

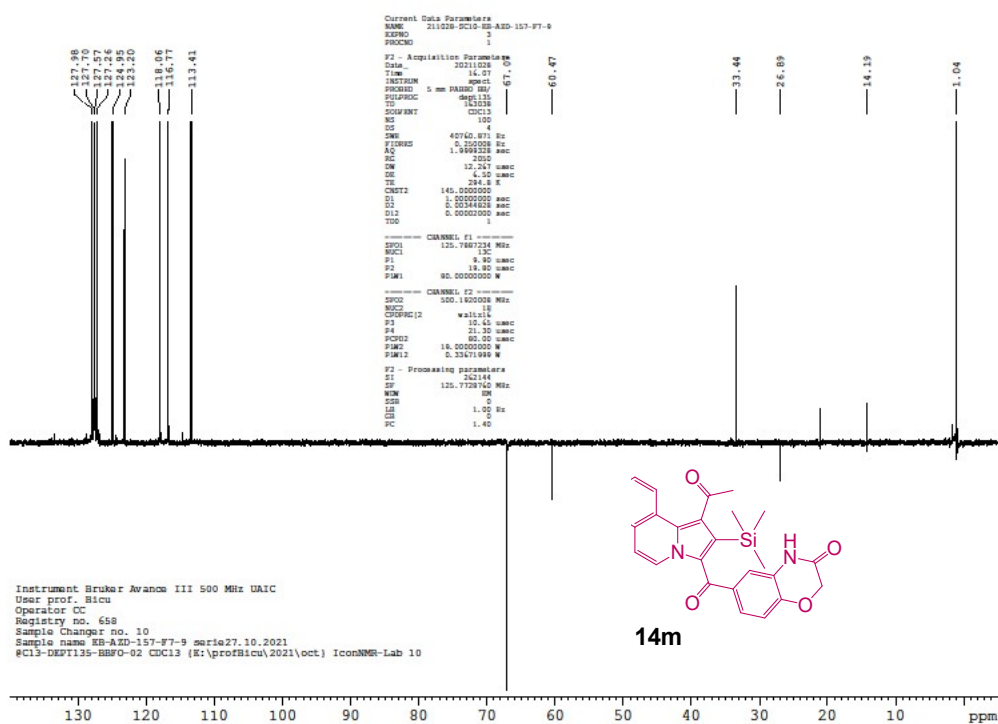

# <sup>1</sup>H NMR (500 MHz, CDCl<sub>3</sub>) -17m

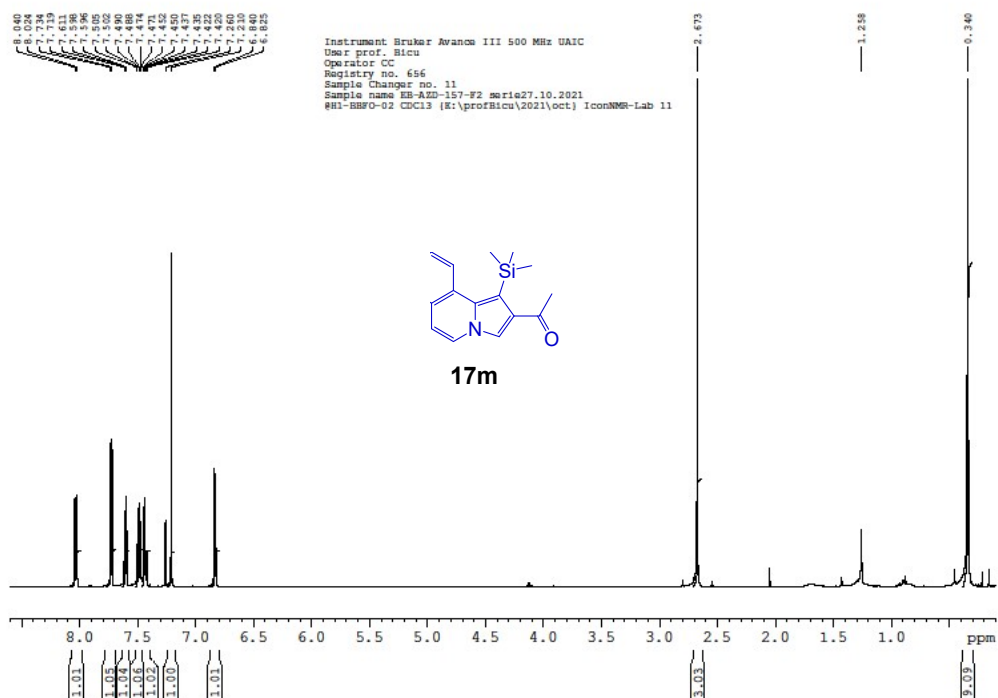



**$^1\text{H}$  NMR (400 MHz,  $\text{CDCl}_3$ ) -10n**

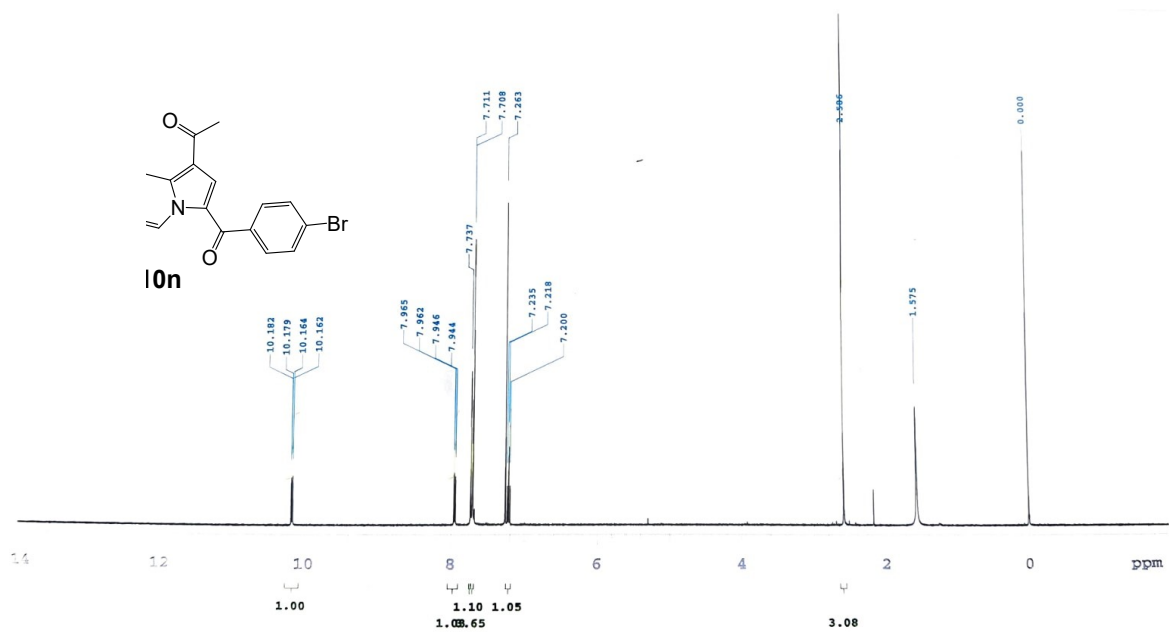

**$^{13}\text{C}$  NMR (100 MHz,  $\text{CDCl}_3$ )**

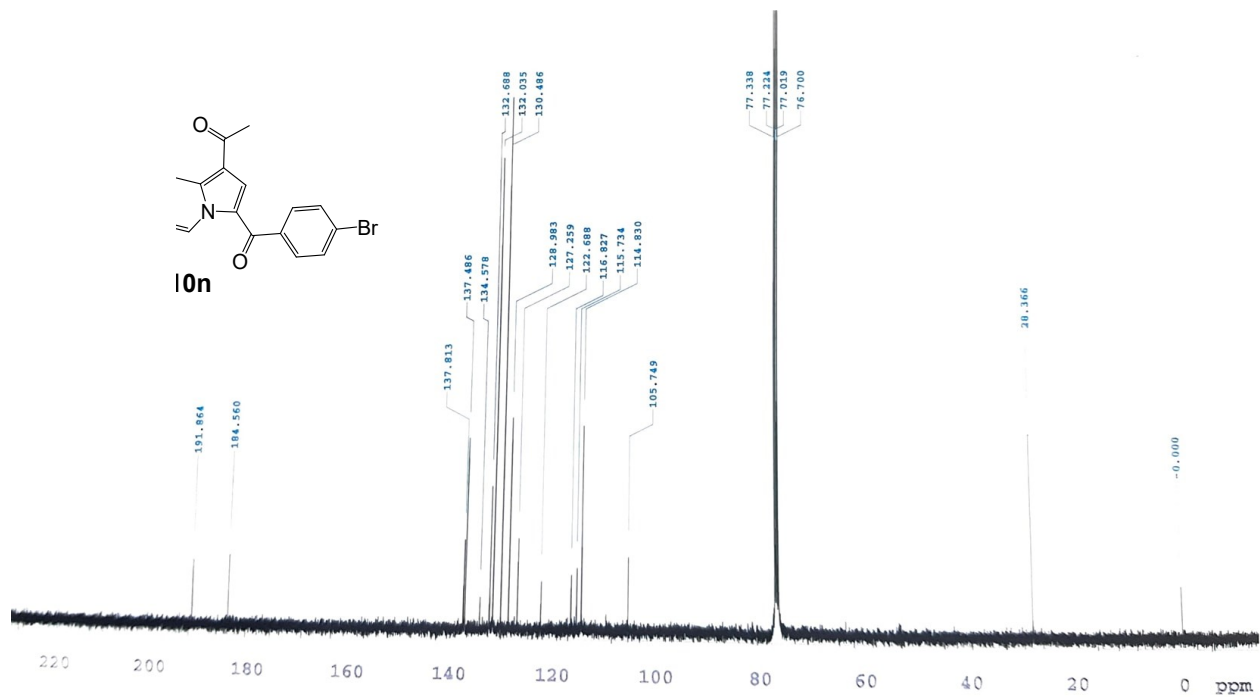

**$^{13}\text{C}$ -DEPT NMR (100 MHz,  $\text{CDCl}_3$ )**

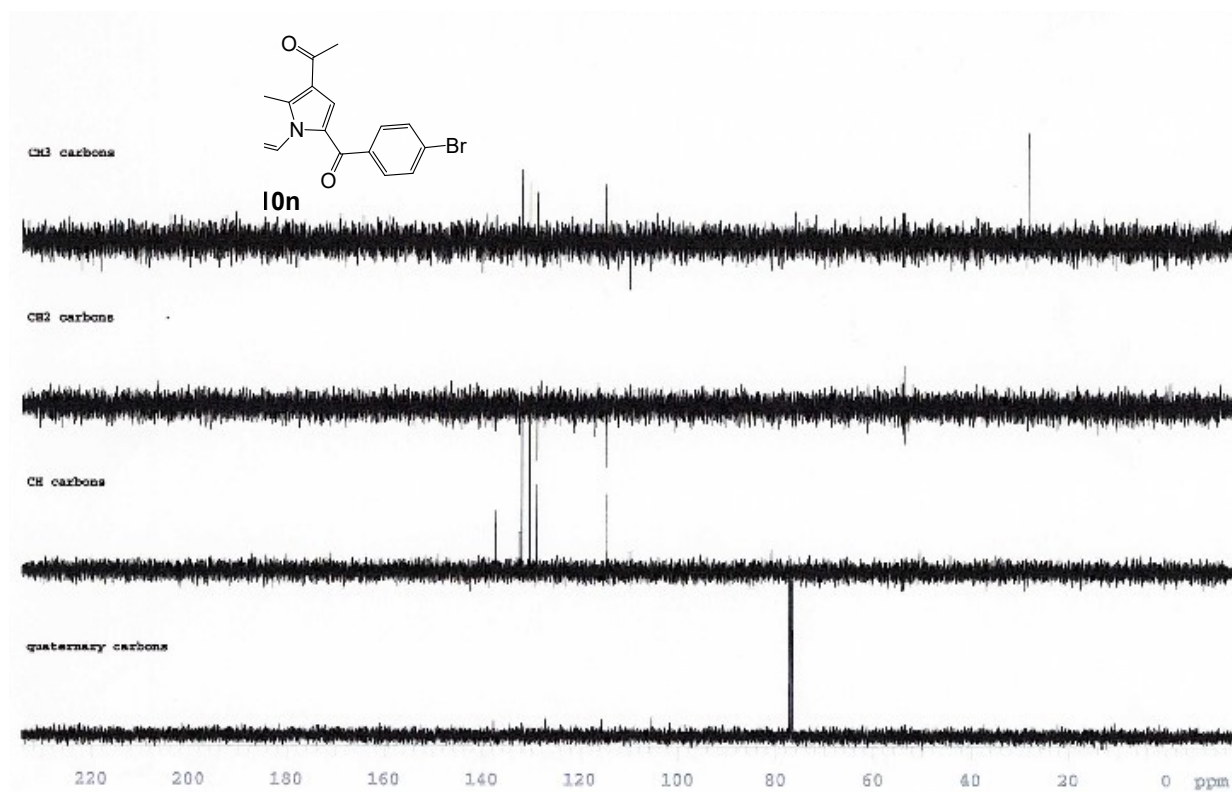

**$^1\text{H}$  NMR (500 MHz,  $\text{DMSO-d}_6$ ) -**10n**'**

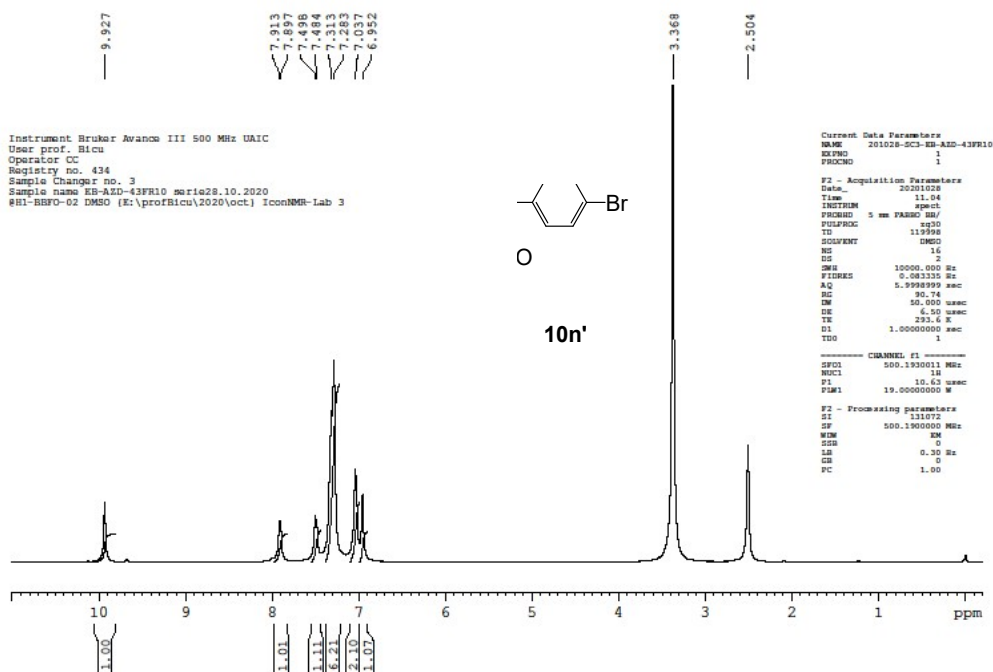

<sup>13</sup>C NMR (125 MHz, DMSO-d<sub>6</sub>)

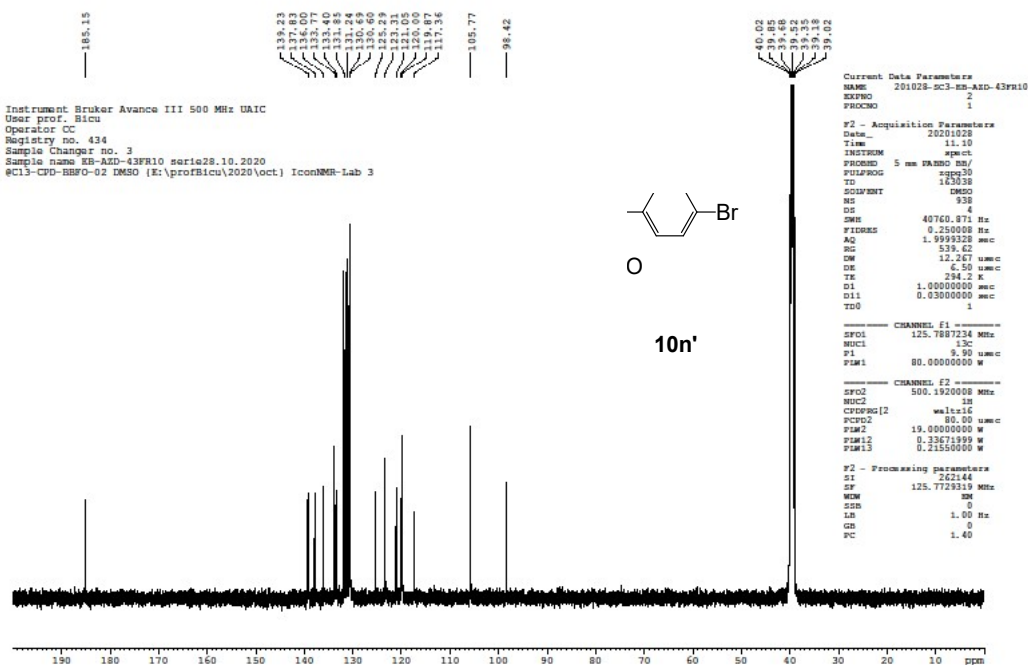

<sup>13</sup>C-DEPT NMR (125 MHz, DMSO-d<sub>6</sub>)



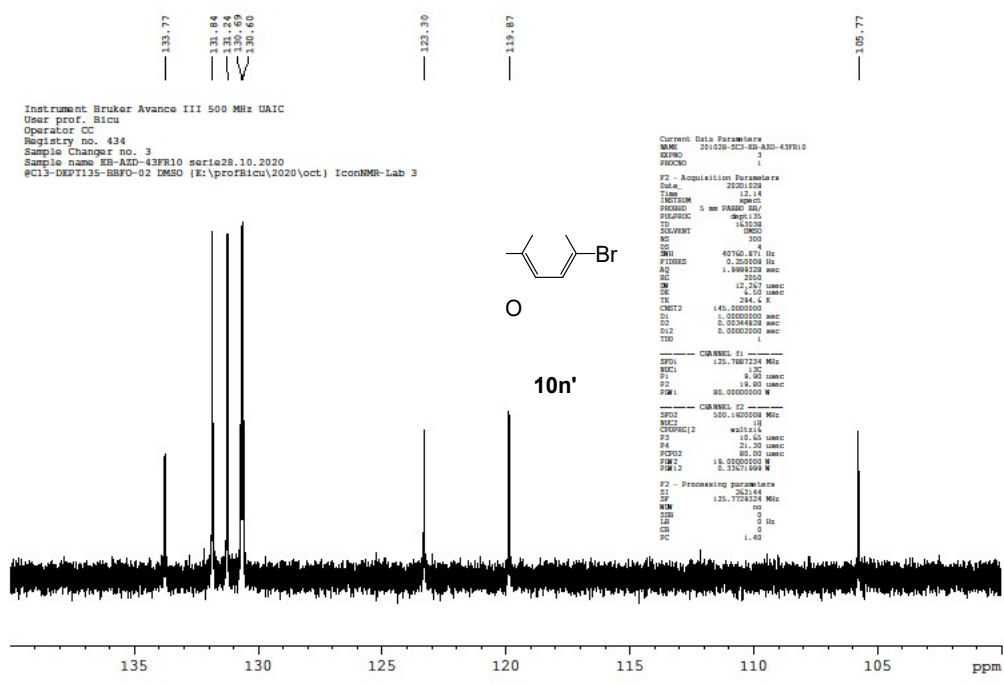

<sup>1</sup>H NMR (400 MHz, DMSO-d<sub>6</sub>) -13c

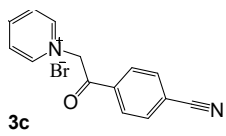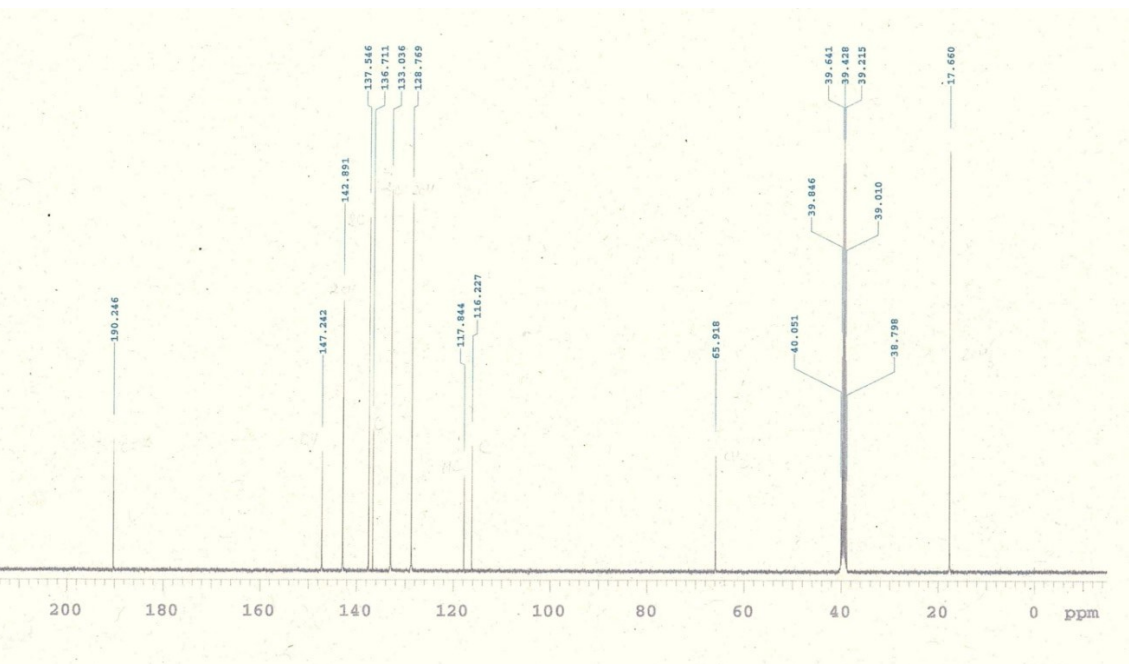

$^{13}\text{C}$  NMR (100 MHz, DMSO- $\text{d}_6$ )

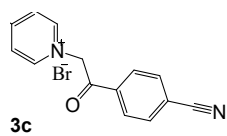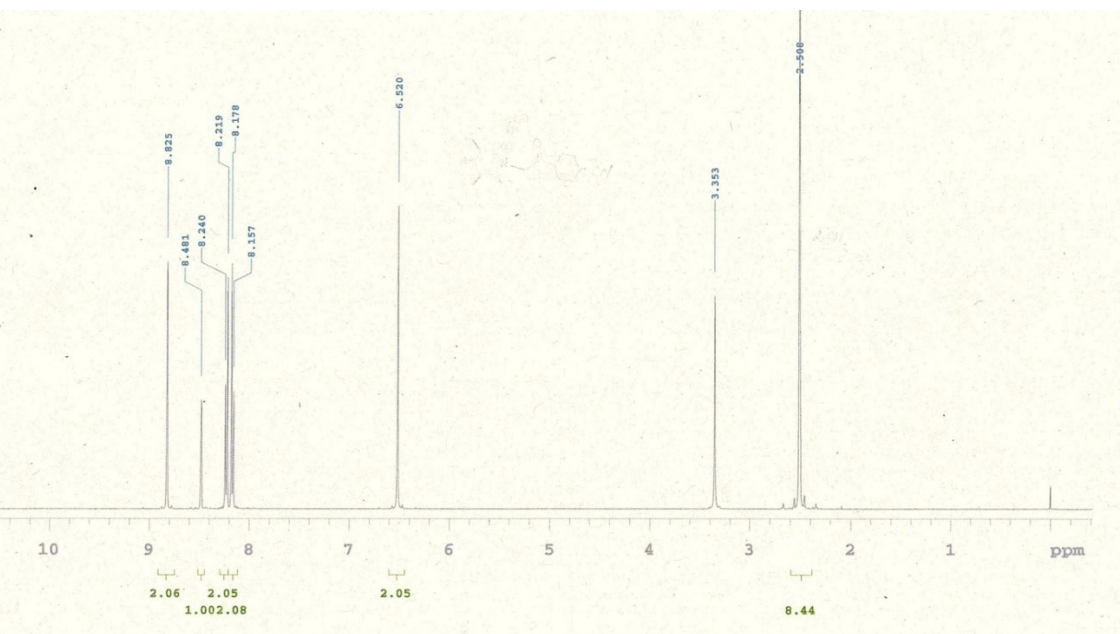

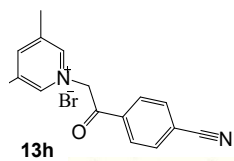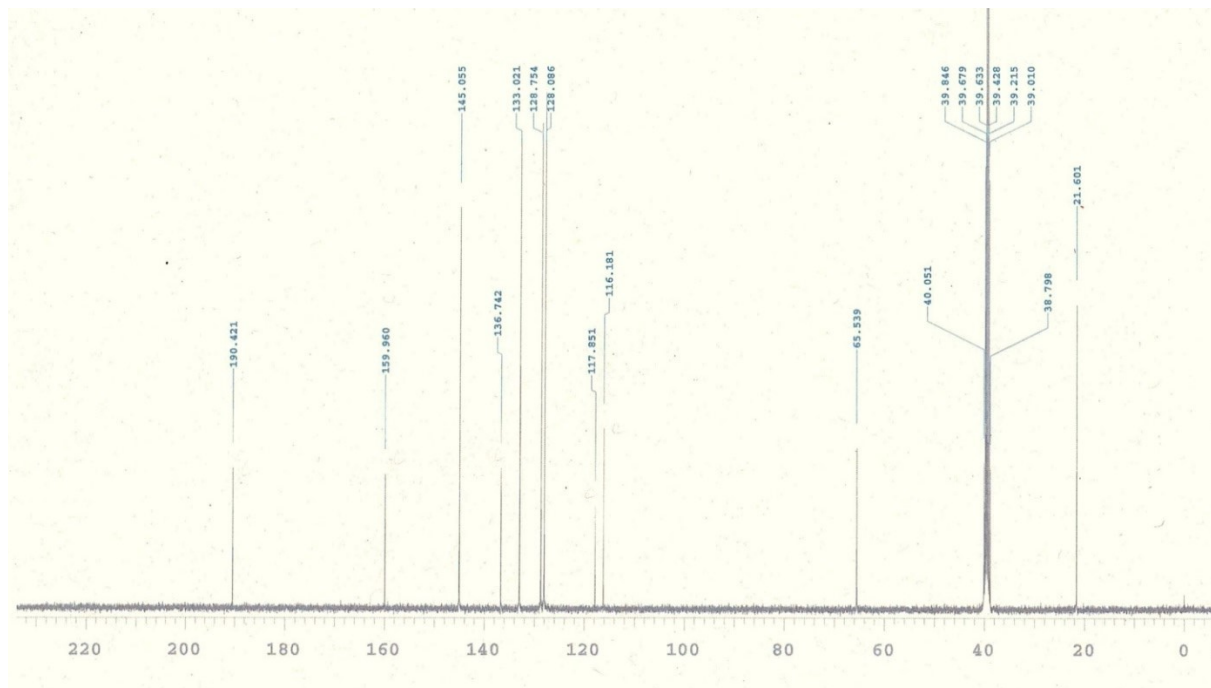

**$^1\text{H}$  NMR (400 MHz, DMSO- $d_6$ ) -13h**

**$^{13}\text{C}$  NMR (100 MHz, DMSO- $d_6$ )**

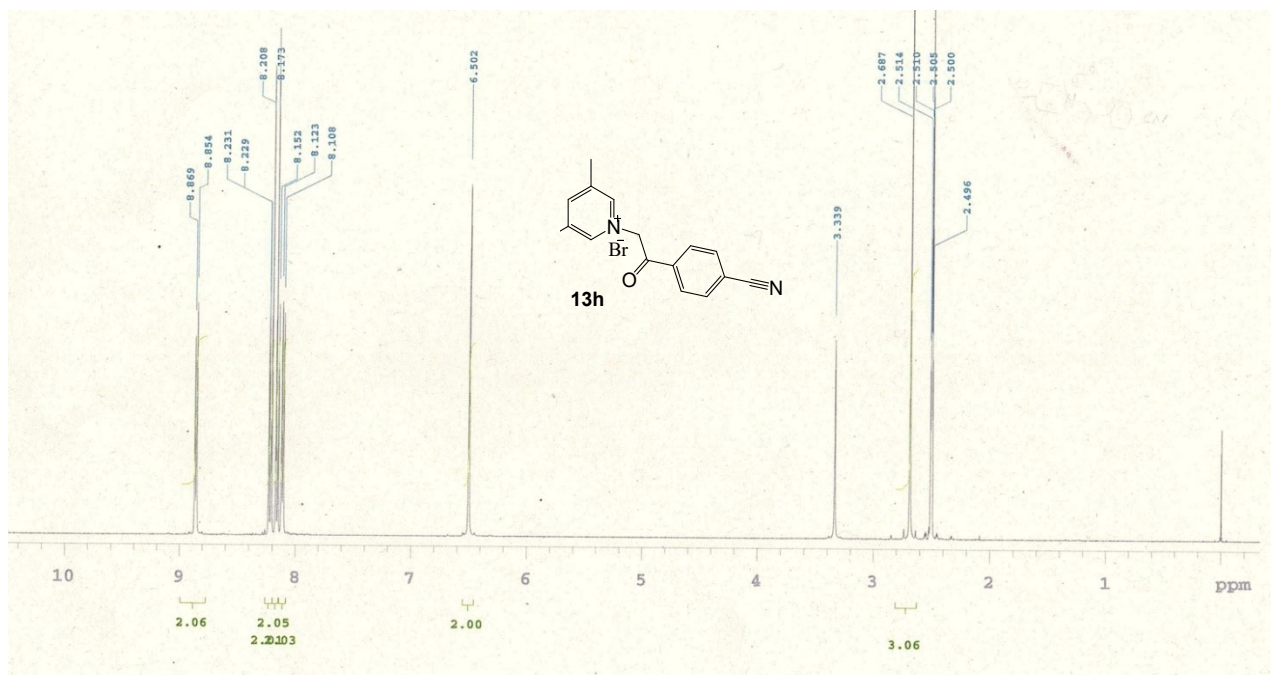

**<sup>1</sup>H NMR (400 MHz, DMSO-d<sub>6</sub>) -13m**

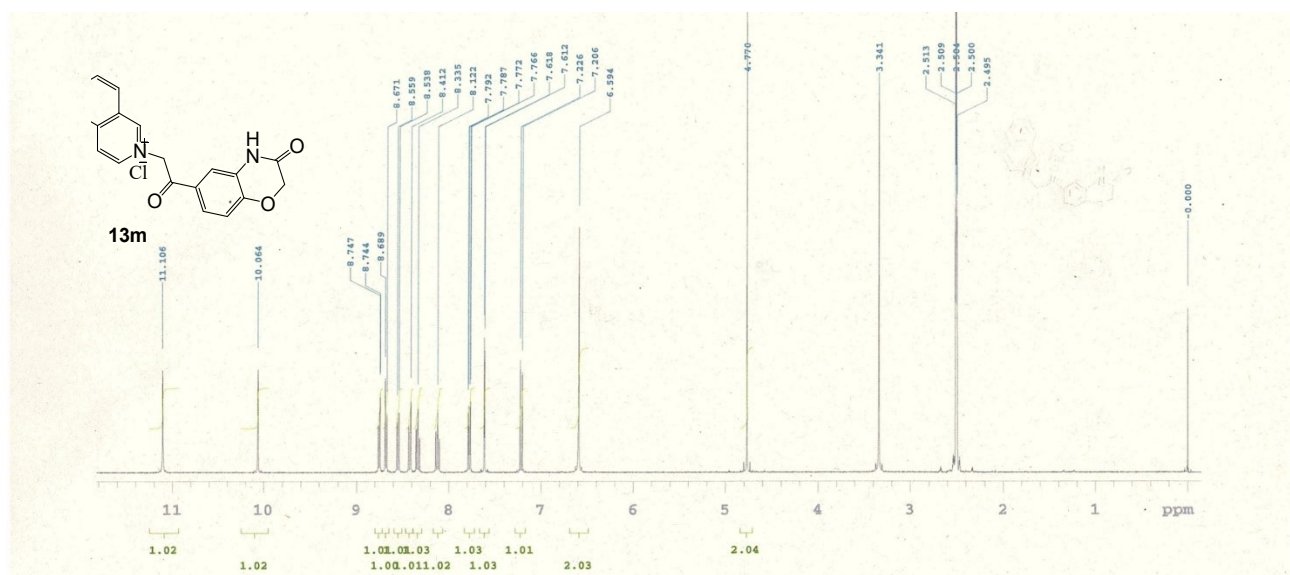

**<sup>13</sup>C NMR (100 MHz, DMSO-d<sub>6</sub>)**

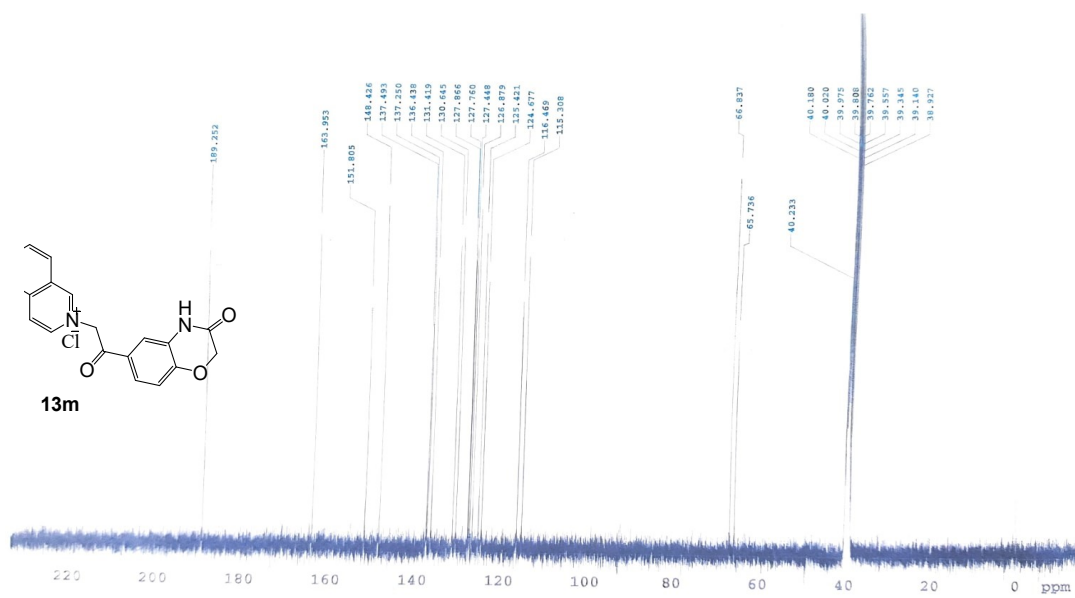

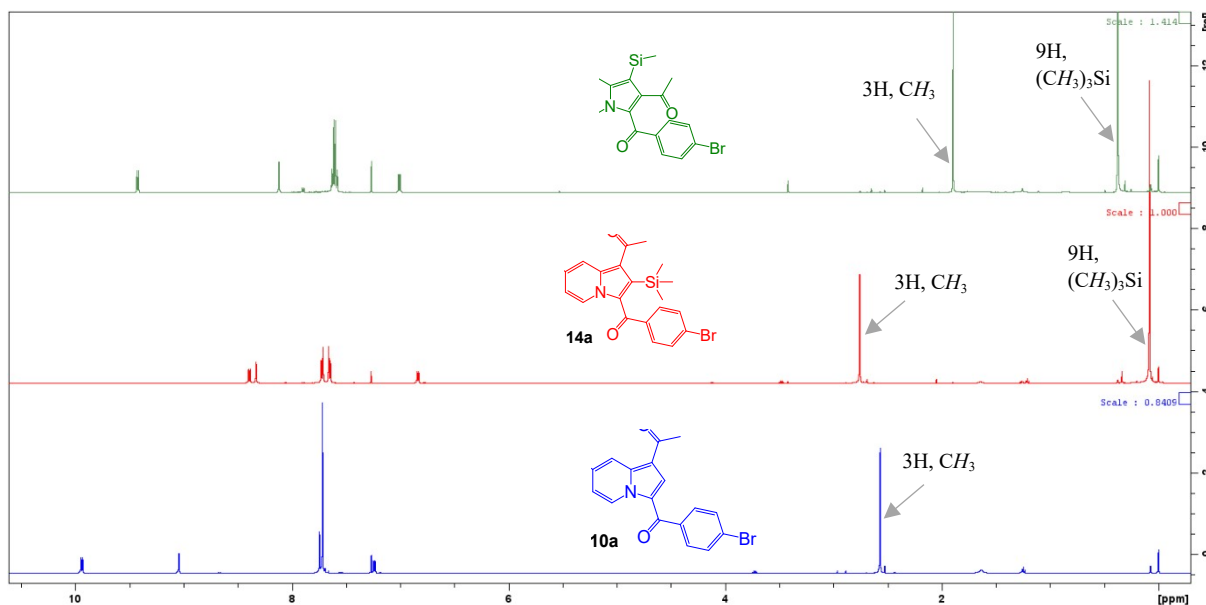

**Figure S1.** Superimposition of  $^1\text{H}$  NMR spectra ( $\text{CDCl}_3$ ) of compounds **10a**, **14a** and **15a**

By superimposing the  $^1\text{H}$  NMR spectra of compounds **10a**, **14a** and **15a** (Figure S1), some characteristics are highlighted also in the aliphatic zone: the characteristic signal of the 9 protons from the trimethylsilyl  $(\text{CH}_3)_3\text{Si}$  group (for structures **14a** and **15a**) and of the 3 protons of the acetyl function, highlighting the fact that in compound **15a**, which contains the acetyl group in position 2, the chemical shift is approximately 1.9 ppm, while in the derivatives with the acetyl group in position 1 (in compounds **10a** and **14a**) the signal is deshielded ( $\delta \sim 2.5$  ppm), as a result of the formation of a hydrogen bond ( $\text{O} \cdots \text{Hindoliz-8}$ ).

# One-dose full graphs obtained on NCI-60 cancer cell lines panel

## Compound 10e

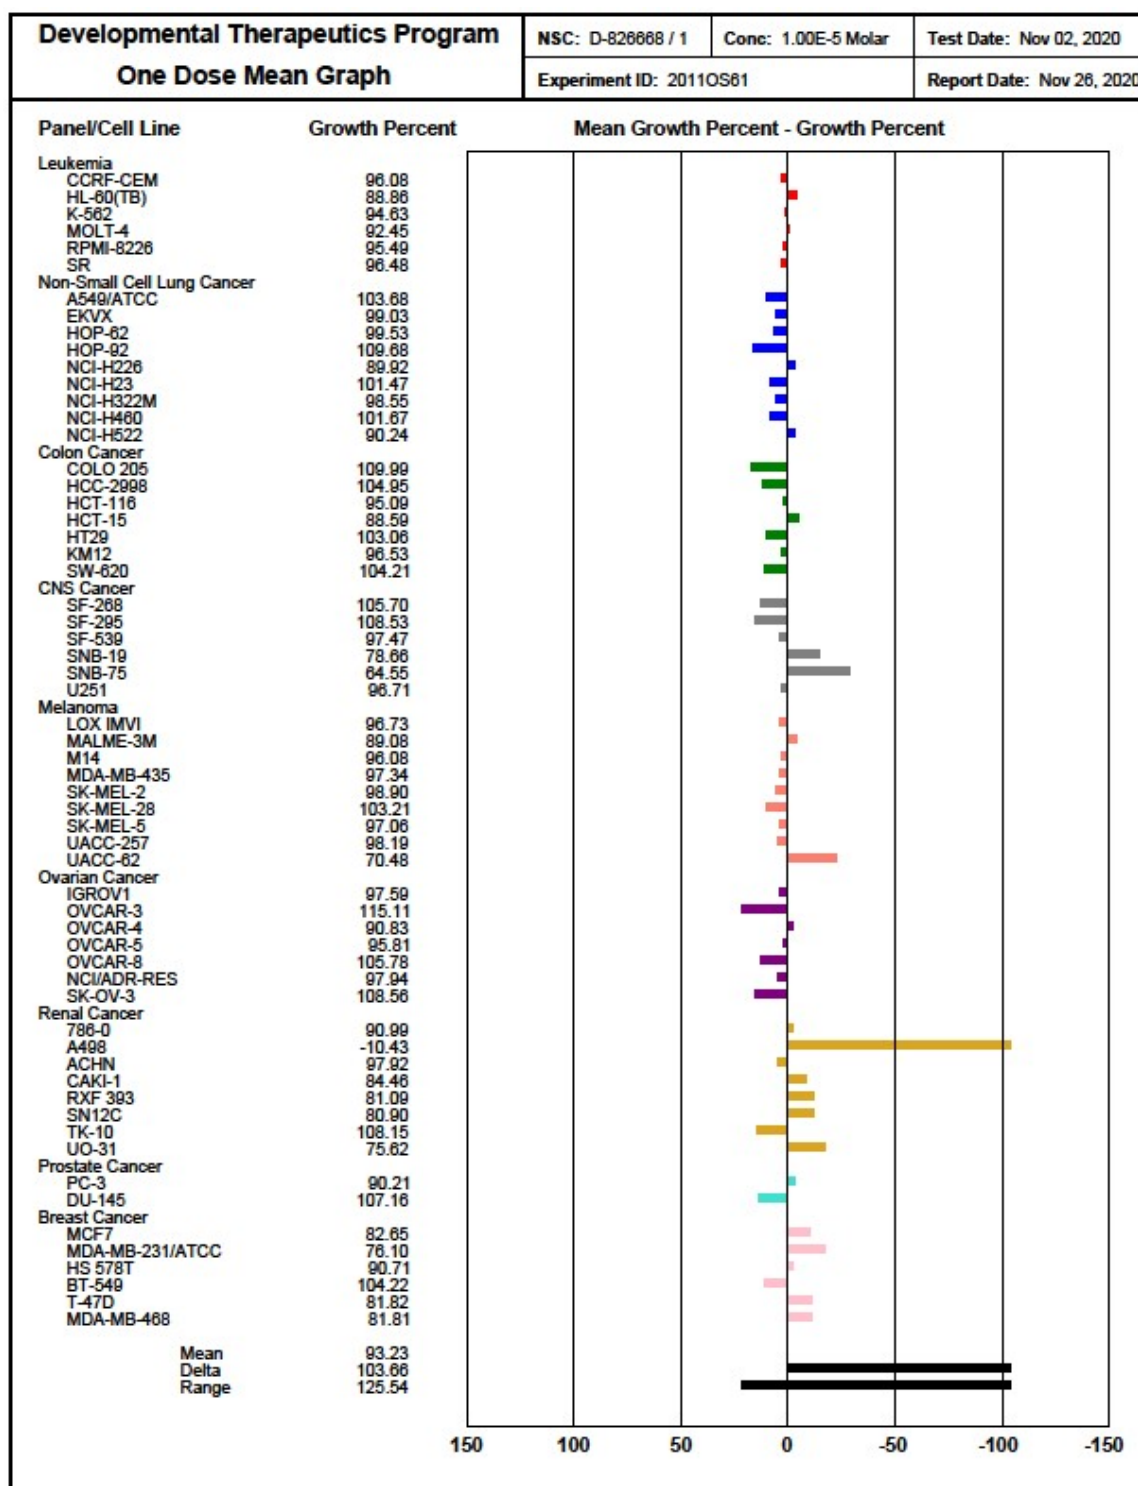



# Compound 10e'

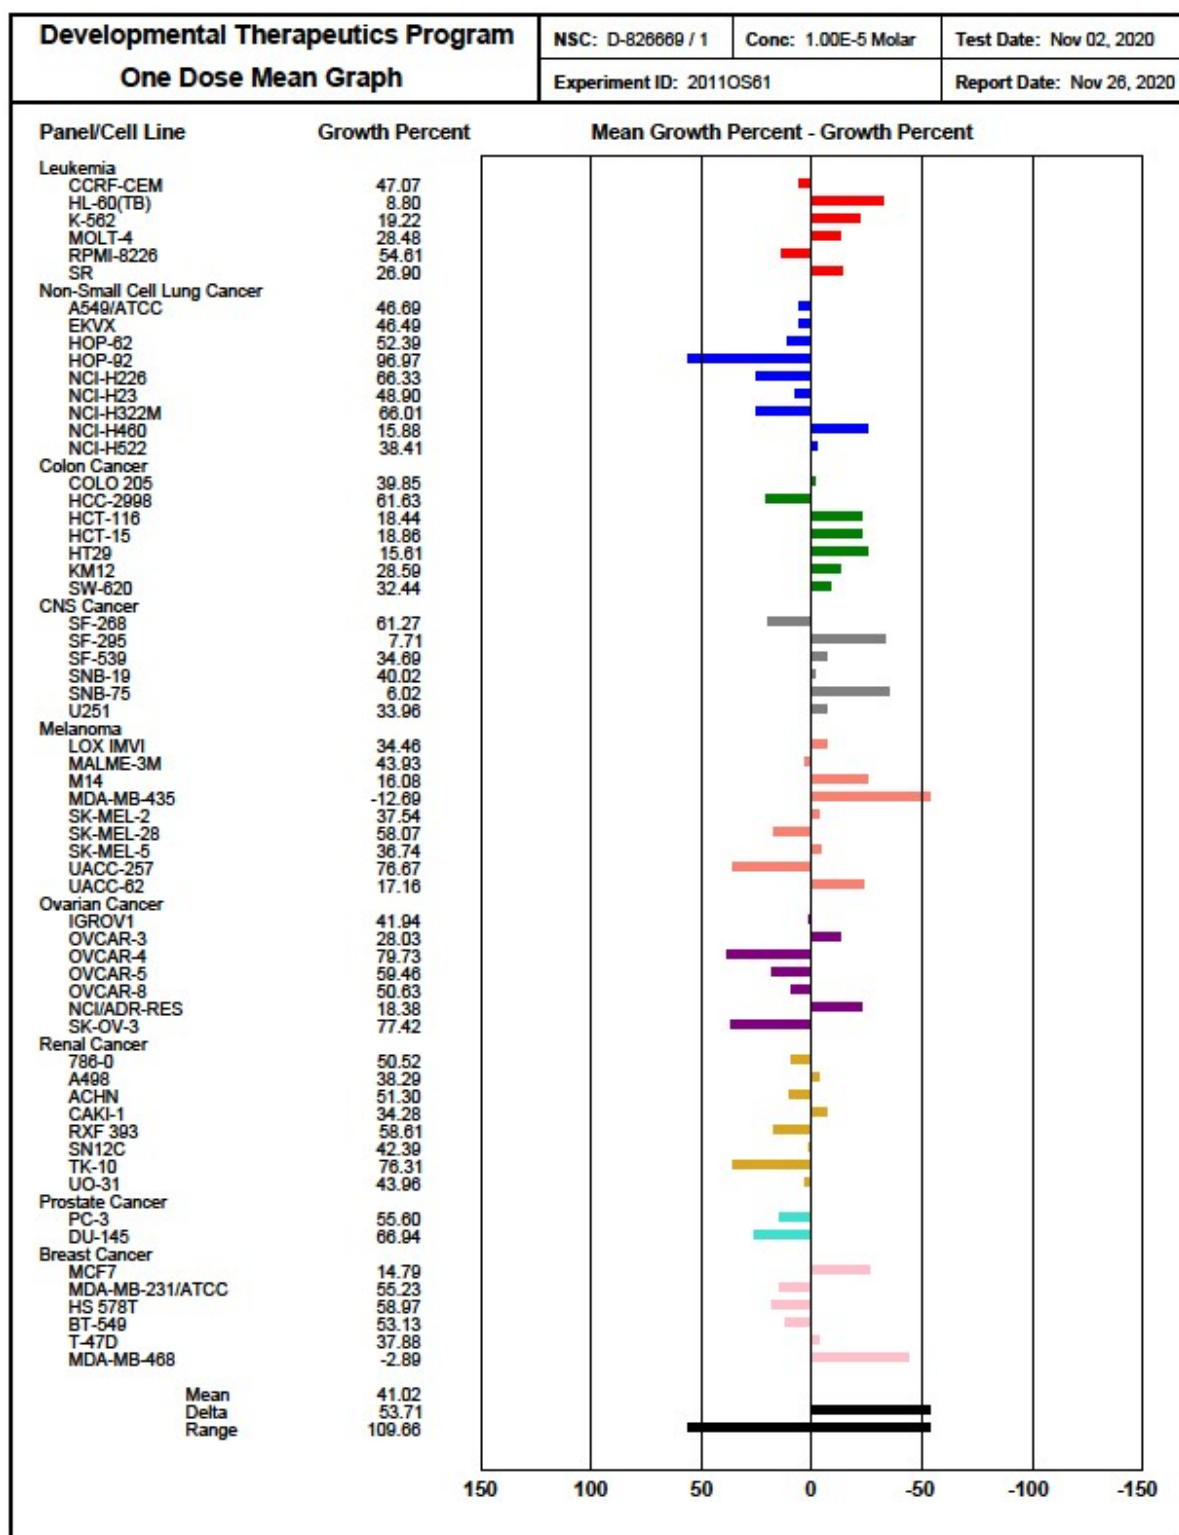

# Compound 10g

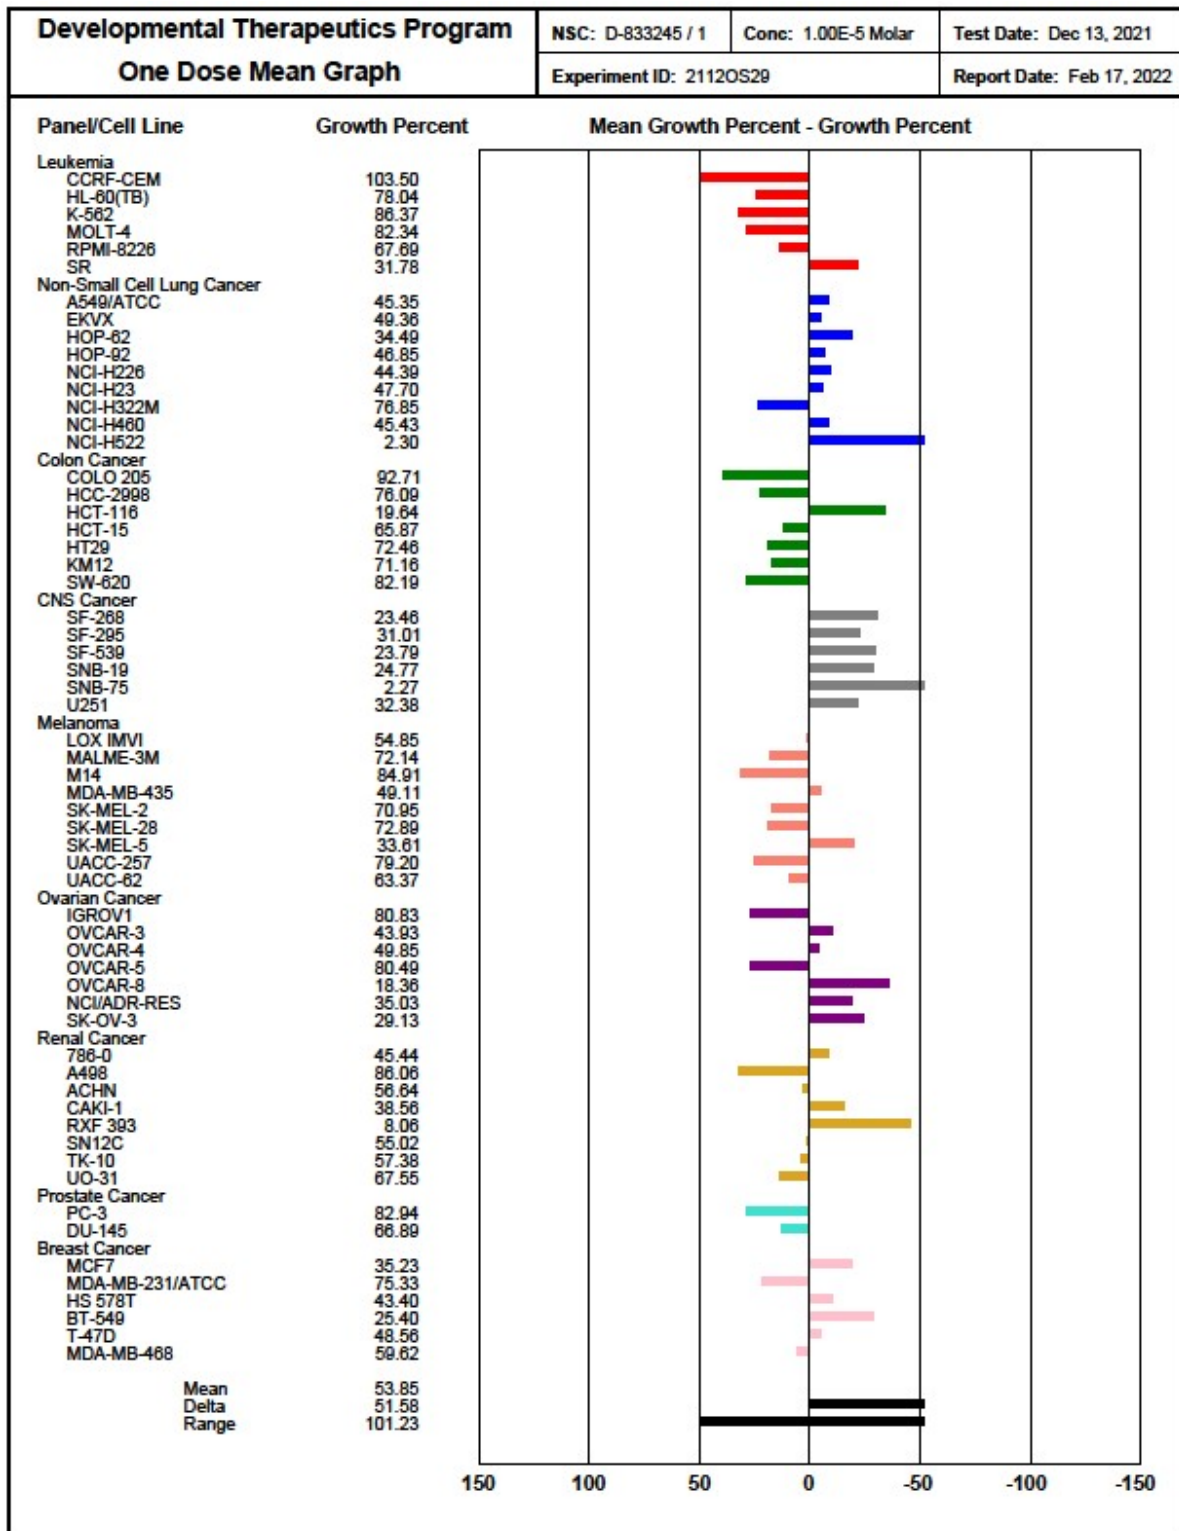

# Compound 10i

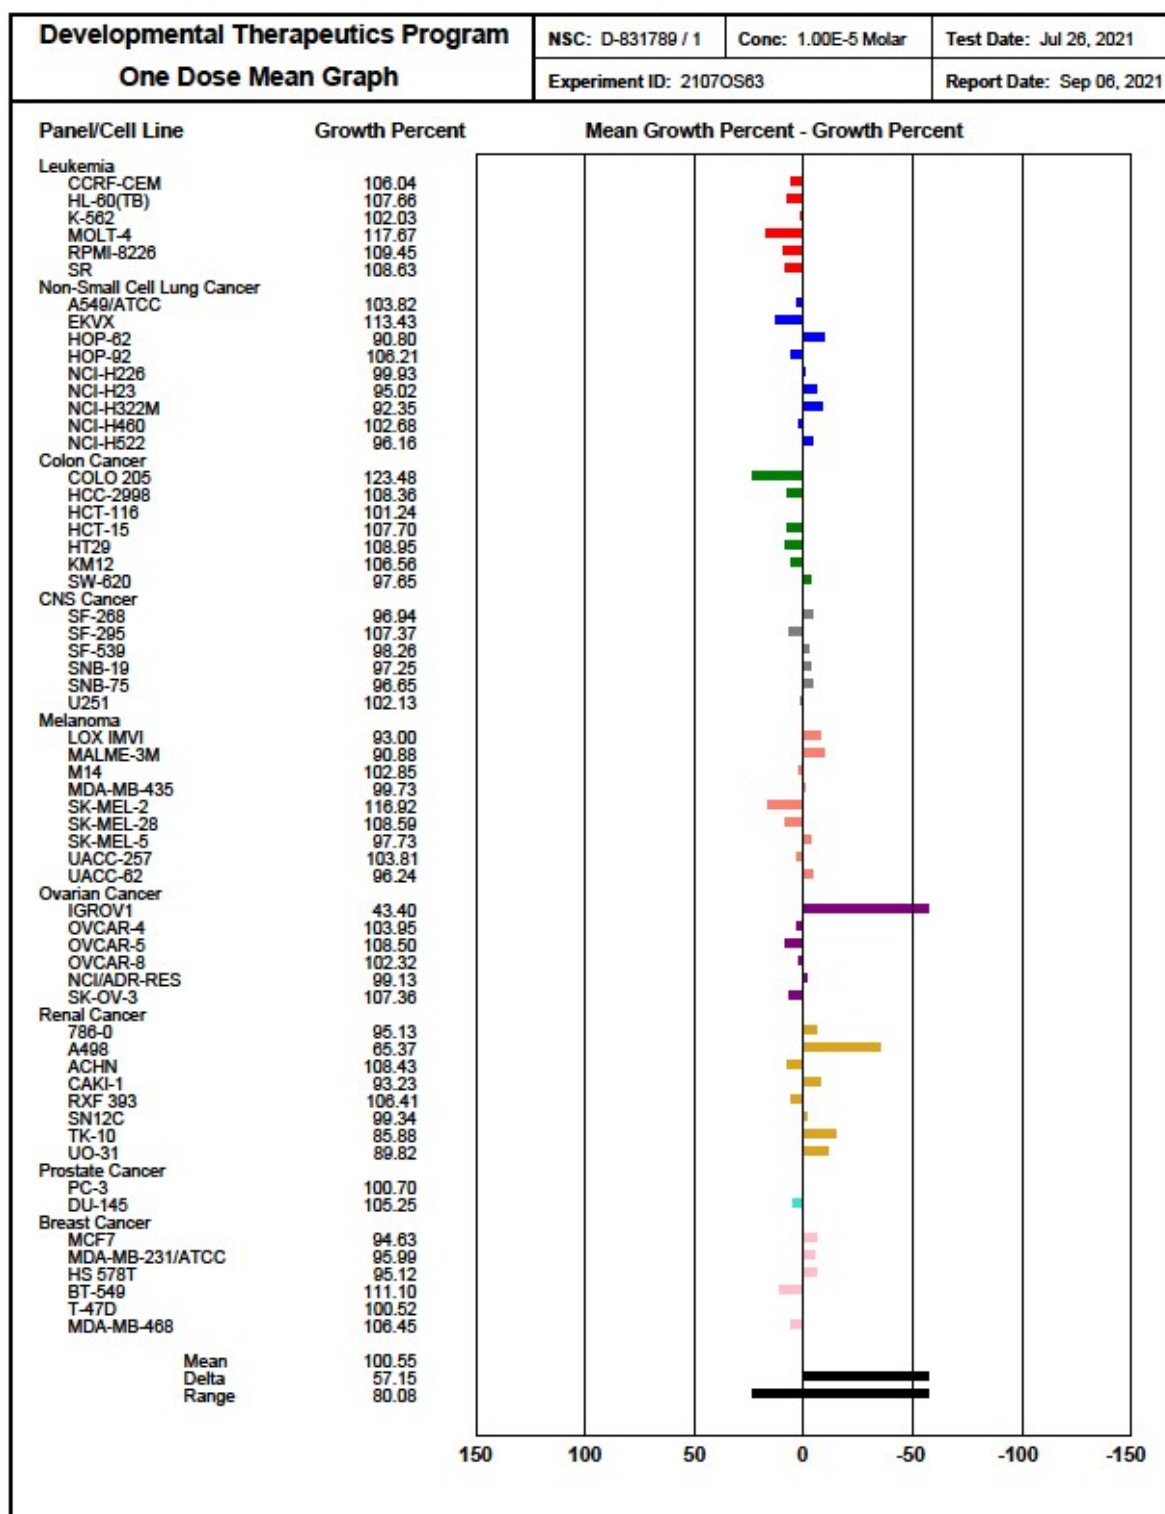

# Compound 10k

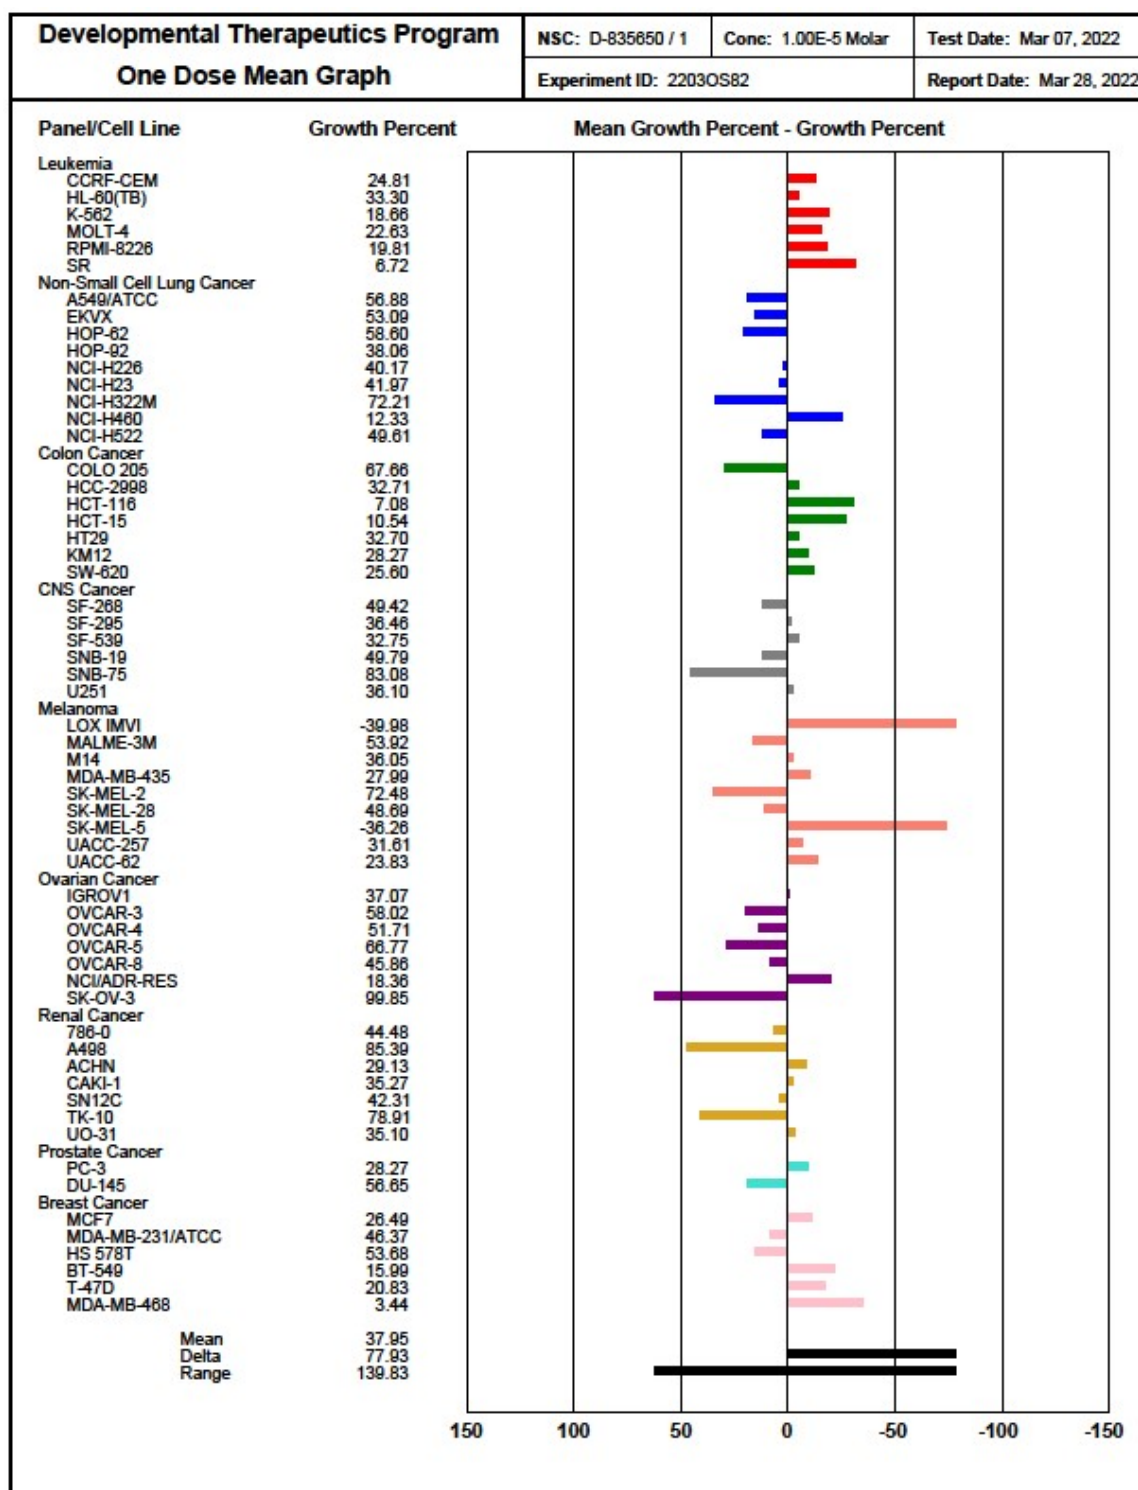

# Compound 101

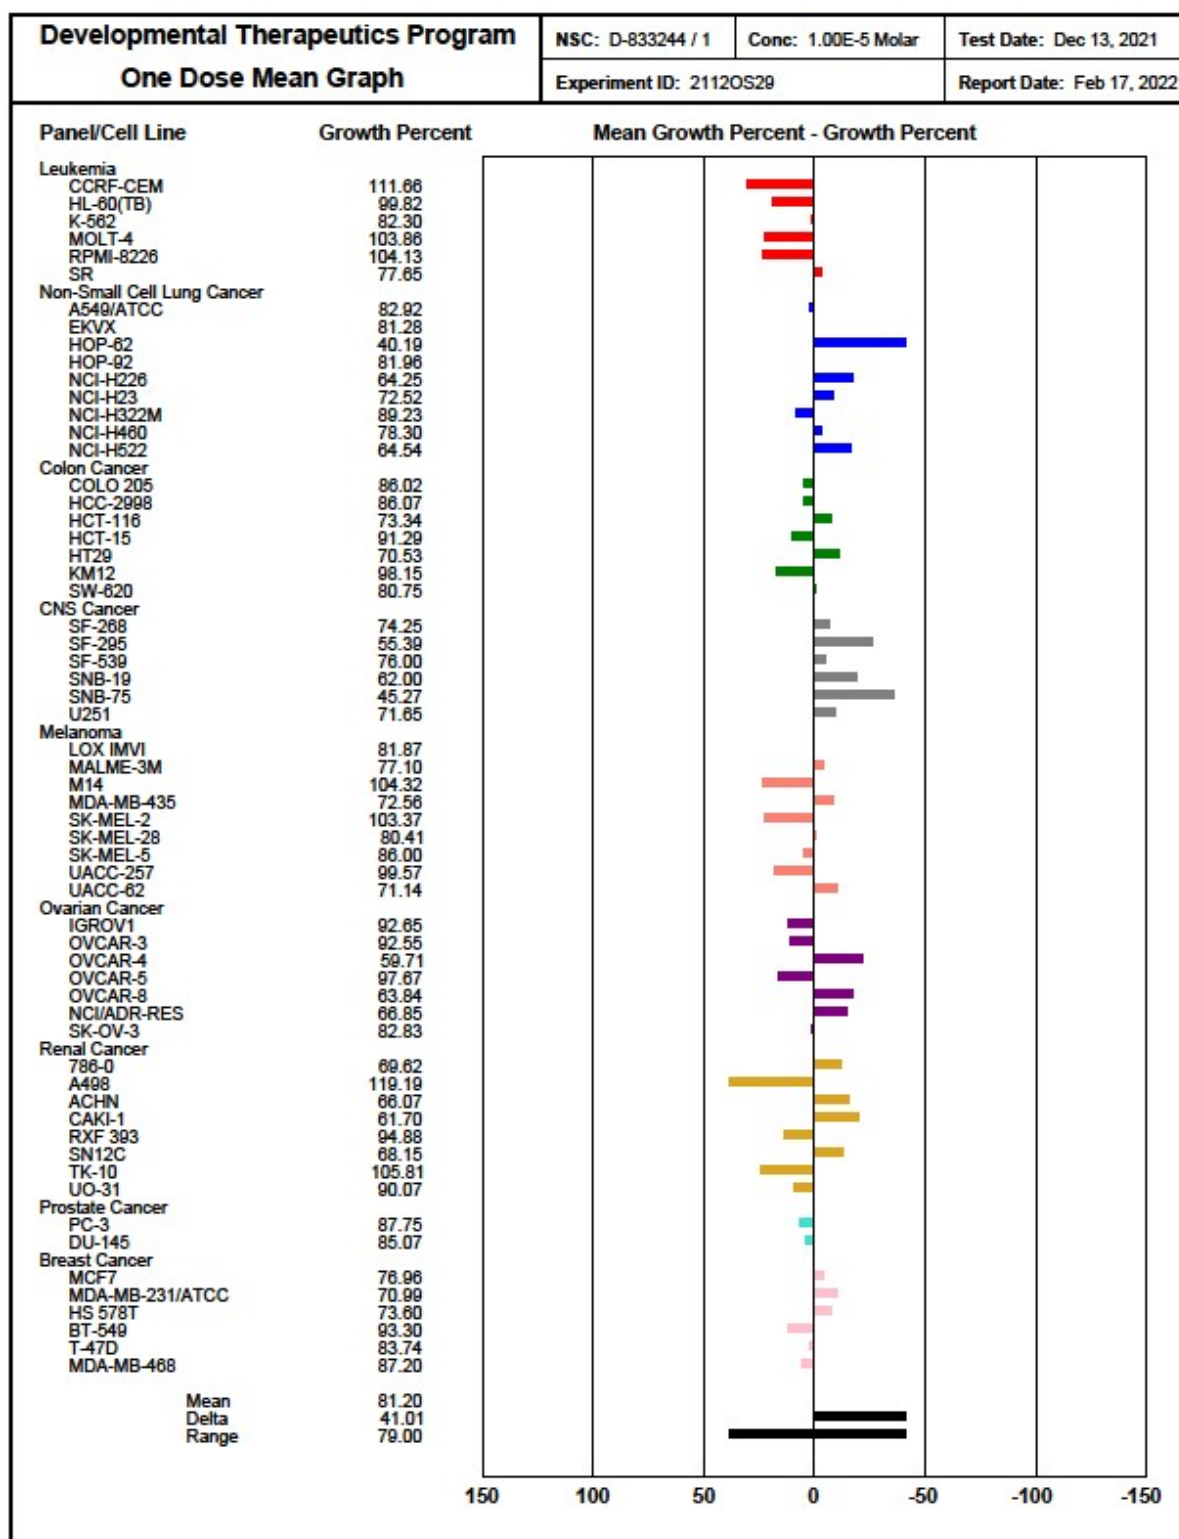



# Compound 10m

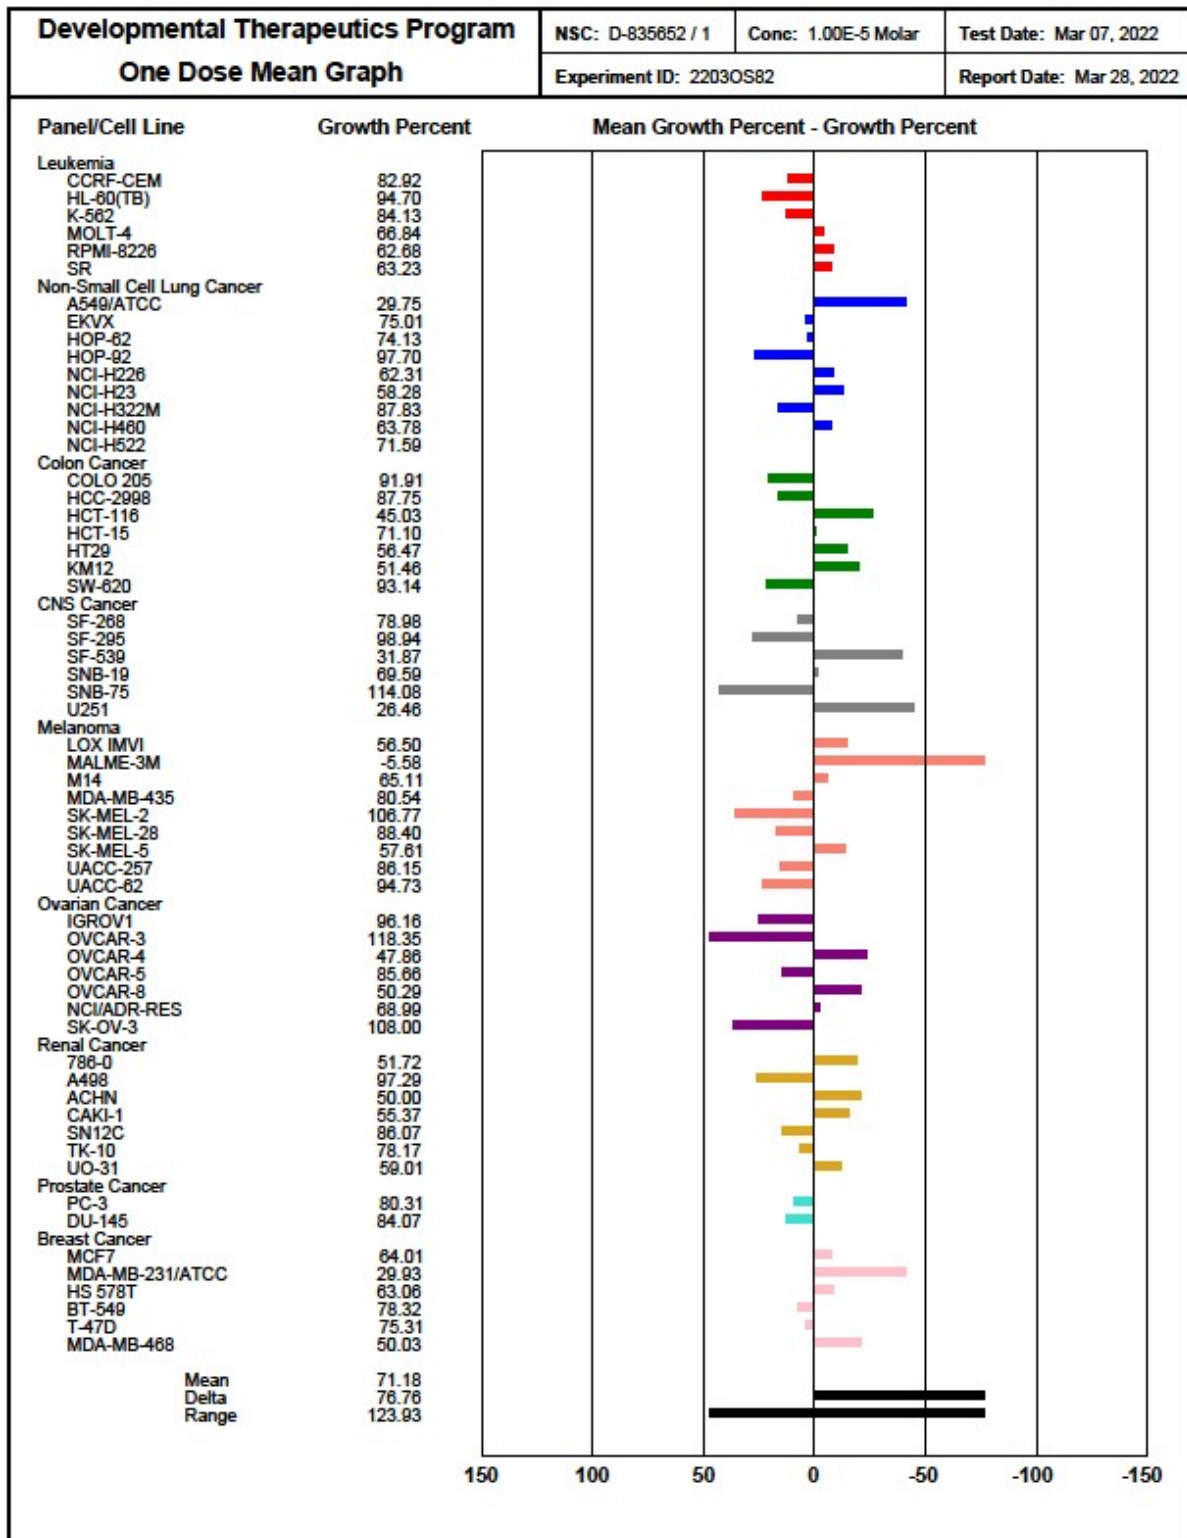

# Compound 17m

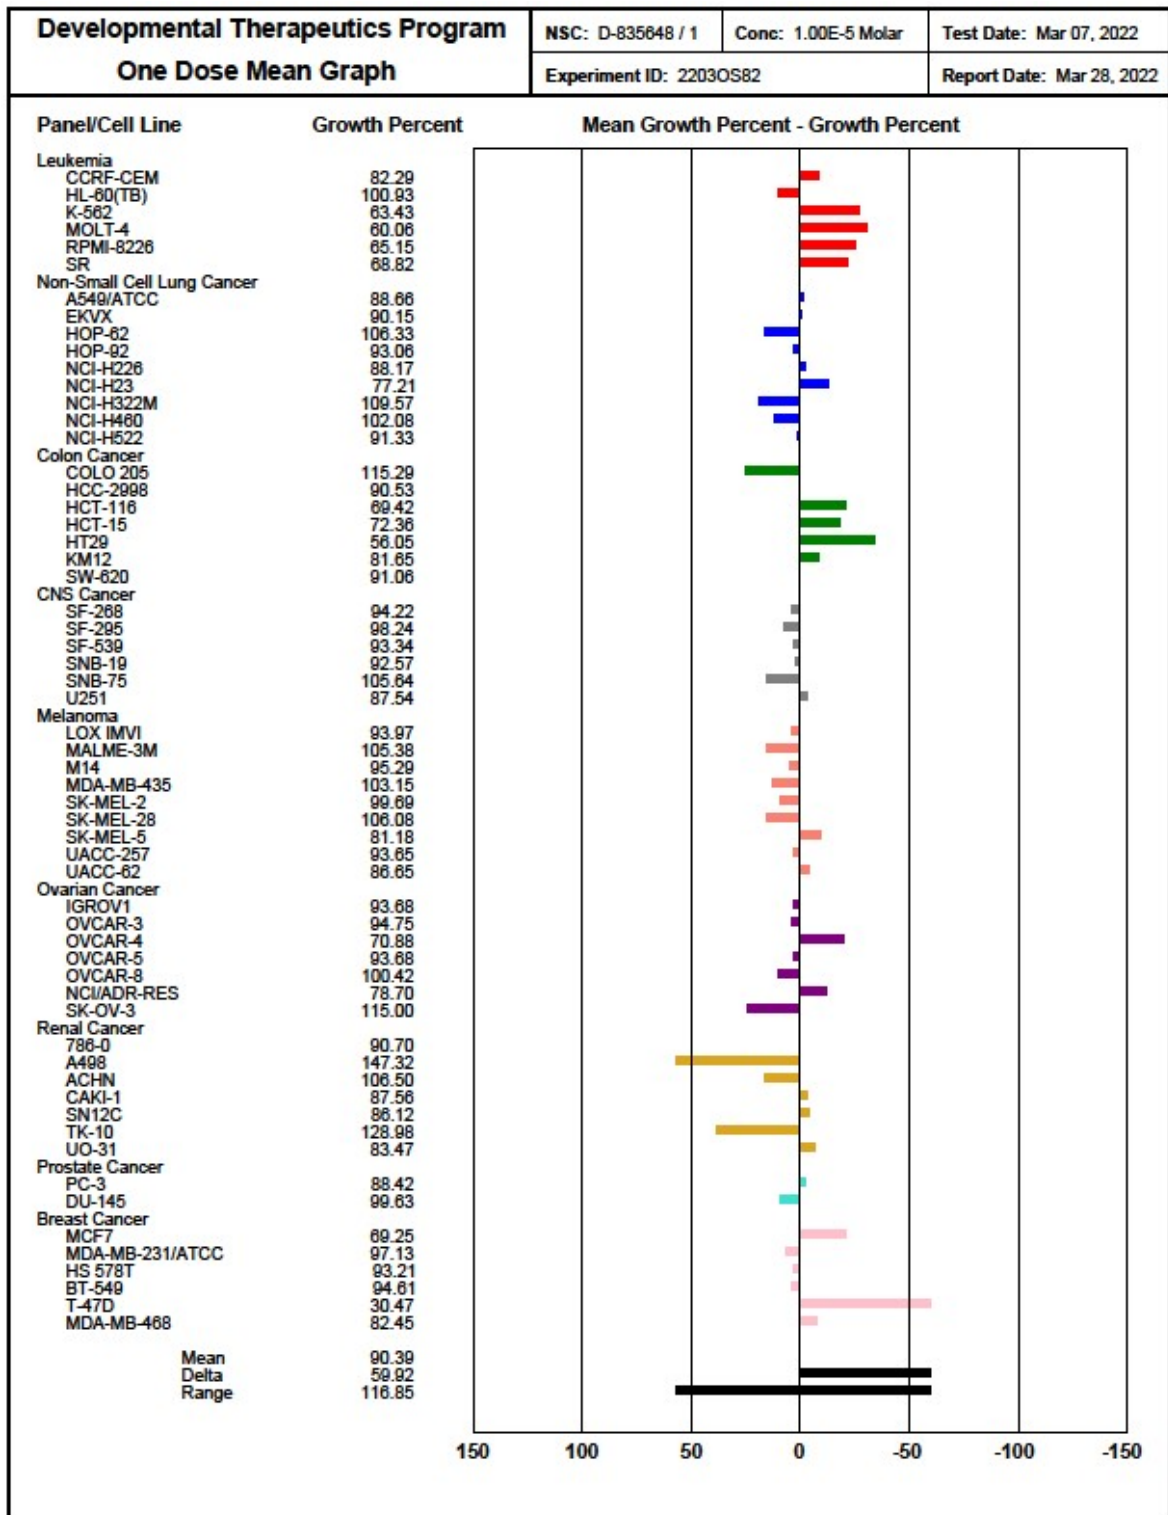

**Table S2. Bond distances (Å) and angles (°).****Compound 14a.**

| molecule |           |           |           |           |
|----------|-----------|-----------|-----------|-----------|
|          | A         | B         | C         |           |
| Br1-C4   | 1.894(7)  | 1.897(7)  | 1.901(7)  |           |
| Si1-C9   | 1.892(7)  | 1.893(7)  | 1.887(7)  |           |
| Si1-C10  | 1.865(6)  | 1.877(6)  | 1.848(8)  |           |
| Si1-C11  | 1.848(7)  | 1.844(7)  | 1.871(7)  |           |
| Si1-C12  | 1.857(8)  | 1.864(7)  | 1.837(8)  |           |
| O1-C7    | 1.215(8)  | 1.229(8)  | 1.226(8)  |           |
| O2-C15   | 1.219(8)  | 1.222(8)  | 1.222(8)  |           |
| N1-C8    | 1.376(8)  | 1.389(8)  | 1.387(8)  |           |
| N1-C14   | 1.415(8)  | 1.402(8)  | 1.404(8)  |           |
| N1-C20   | 1.405(9)  | 1.380(8)  | 1.385(9)  |           |
| N2-C21   | 1.151(9)  | 1.142(8)  | 1.138(9)  |           |
| C1-C2    | 1.386(9)  | 1.395(9)  | 1.392(10) |           |
| C1-C6    | 1.381(10) | 1.369(10) | 1.380(10) |           |
| C1-C7    | 1.500(9)  | 1.473(9)  | 1.479(9)  |           |
| C2-C3    | 1.383(10) | 1.381(10) | 1.383(10) |           |
| C3-C4    | 1.387(10) | 1.359(10) | 1.384(10) |           |
| C4-C5    | 1.388(9)  | 1.389(10) | 1.364(10) |           |
| C5-C6    | 1.385(10) | 1.382(10) | 1.393(10) |           |
| C7-C8    | 1.502(9)  | 1.510(9)  | 1.480(9)  |           |
| C8-C9    | 1.393(9)  | 1.374(9)  | 1.388(9)  |           |
| C9-C13   | 1.432(9)  | 1.447(8)  | 1.435(9)  |           |
| C13-C14  |           | 1.384(9)  | 1.397(9)  | 1.398(9)  |
| C13-C15  |           | 1.470(10) | 1.467(9)  | 1.474(10) |
| C14-C17  |           | 1.417(9)  | 1.406(8)  | 1.421(9)  |
| C15-C16  |           | 1.504(9)  | 1.496(8)  | 1.501(10) |
| C17-C18  |           | 1.391(10) | 1.342(9)  | 1.358(10) |



|             |           |           |           |
|-------------|-----------|-----------|-----------|
| C18-C19     | 1.415(10) | 1.431(9)  | 1.436(9)  |
| C18-C21     | 1.439(10) | 1.461(10) | 1.444(10) |
| C19-C20     | 1.327(9)  | 1.350(9)  | 1.340(9)  |
| C10-Si1-C9  | 110.2(3)  | 108.2(3)  | 110.8(3)  |
| C11-Si1-C9  | 112.6(3)  | 112.5(3)  | 109.2(3)  |
| C11-Si1-C10 | 107.3(3)  | 107.6(3)  | 106.3(4)  |
| C11-Si1-C12 | 112.1(4)  | 112.6(4)  | 108.4(4)  |
| C12-Si1-C9  | 110.0(3)  | 110.4(3)  | 112.1(3)  |
| C12-Si1-C10 | 104.3(3)  | 105.2(3)  | 109.9(4)  |
| C8-N1-C14   | 109.0(6)  | 108.1(6)  | 109.5(6)  |
| C8-N1-C20   | 129.8(6)  | 129.4(6)  | 129.0(6)  |
| C20-N1-C14  | 121.1(6)  | 122.5(5)  | 121.5(6)  |
| C2-C1-C7    | 119.6(7)  | 119.7(7)  | 120.1(7)  |
| C6-C1-C2    | 119.7(7)  | 118.0(7)  | 119.3(7)  |
| C6-C1-C7    | 120.7(7)  | 122.3(7)  | 120.5(7)  |
| C3-C2-C1    | 121.2(7)  | 120.8(7)  | 119.9(8)  |
| C2-C3-C4    | 118.0(7)  | 119.7(7)  | 119.6(8)  |
| C3-C4-Br1   | 119.4(6)  | 120.3(6)  | 119.1(6)  |
| C3-C4-C5    | 121.9(7)  | 121.3(7)  | 121.3(7)  |
| C5-C4-Br1   | 118.7(6)  | 118.4(6)  | 119.6(6)  |
| C6-C5-C4    | 118.7(7)  | 118.0(7)  | 118.9(7)  |
| C1-C6-C5    | 120.5(7)  | 122.3(7)  | 120.8(8)  |
| O1-C7-C1    | 122.2(7)  | 122.8(6)  | 121.2(6)  |
| O1-C7-C8    | 120.0(7)  | 117.7(7)  | 119.1(6)  |
| C1-C7-C8    | 117.8(7)  | 119.5(6)  | 119.6(6)  |
| N1-C8-C7    | 121.9(6)  | 119.0(6)  | 120.9(6)  |
| N1-C8-C9    | 109.3(6)  | 110.4(6)  | 109.2(6)  |
| C9-C8-C7    | 128.8(6)  | 130.6(6)  | 129.9(7)  |
| C8-C9-Si1   | 125.9(5)  | 127.0(5)  | 125.9(5)  |
| C8-C9-C13   | 105.9(6)  | 105.8(6)  | 105.9(6)  |

|             |           |          |          |
|-------------|-----------|----------|----------|
| C13-C9-Si1  | 127.2(6)  | 126.1(5) | 127.2(6) |
| C9-C13-C15  | 122.6(6)  | 122.8(6) | 123.6(7) |
| C14-C13-C9  | 109.3(6)  | 108.2(6) | 109.4(7) |
| C14-C13-C15 | 127.9(6)  | 129.0(6) | 126.8(6) |
| N1-C14-C17  | 117.5(7)  | 116.6(6) | 117.1(6) |
| C13-C14-N1  | 106.4(6)  | 107.4(5) | 106.1(6) |
| C13-C14-C17 | 136.0(7)  | 135.9(6) | 136.8(7) |
| O2-C15-C13  | 119.1(7)  | 119.0(6) | 119.4(7) |
| O2-C15-C16  | 120.0(7)  | 119.7(7) | 120.6(7) |
| C13-C15-C16 | 120.8(6)  | 121.3(6) | 120.0(7) |
| C18-C17-C14 | 119.2(7)  | 120.6(6) | 120.1(7) |
| C17-C18-C19 | 121.3(7)  | 121.7(6) | 121.5(7) |
| C17-C18-C21 | 119.7(7)  | 121.7(6) | 121.1(7) |
| C19-C18-C21 | 119.0(7)  | 116.7(6) | 117.4(7) |
| C20-C19-C18 | 119.8(7)  | 118.3(7) | 118.1(7) |
| C19-C20-N1  | 120.8(7)  | 120.1(6) | 121.7(7) |
| N2-C21-C18  | 179.9(11) | 176.9(9) | 177.4(9) |

**Compound 15a.**

|         |          |
|---------|----------|
| Br1-C4  | 1.897(3) |
| Si1-C12 | 1.883(3) |
| Si1-C13 | 1.853(3) |
| Si1-C14 | 1.859(3) |
| Si1-C15 | 1.870(3) |
| O1-C7   | 1.218(3) |
| O2-C10  | 1.206(3) |
| N1-C8   | 1.385(3) |
| N1-C16  | 1.403(3) |
| N1-C20  | 1.383(3) |
| N2-C21  | 1.146(4) |
| C1-C2   | 1.391(4) |

C1-C6 1.379(4)  
C1-C7 1.499(4)  
C2-C3 1.390(4)  
C3-C4 1.367(5)  
C4-C5 1.376(5)  
C5-C6 1.390(4)  
C7-C8 1.461(4)  
C8-C9 1.404(4)  
C9-C10 1.504(4)  
C9-C12 1.410(3)  
C10-C11 1.492(4)  
C12-C16 1.390(4)  
C16-C17 1.416(3)  
C17-C18 1.360(4)  
C18-C19 1.422(4)  
C18-C21 1.437(4)  
C19-C20 1.345(4)  
  
C13-Si1-C12 109.65(13)  
C13-Si1-C14 111.30(16)  
C13-Si1-C15 107.50(15)  
C14-Si1-C12 108.48(14)  
C14-Si1-C15 108.95(16)  
C15-Si1-C12 110.97(14)  
C8-N1-C16 108.7(2)  
C20-N1-C8 129.2(2)  
C20-N1-C16 121.9(2)  
C2-C1-C7 117.8(3)  
C6-C1-C2 119.3(3)  
C6-C1-C7 122.9(3)  
C3-C2-C1 120.1(3)

|             |            |
|-------------|------------|
| C4-C3-C2    | 119.3(3)   |
| C3-C4-Br1   | 118.1(2)   |
| C3-C4-C5    | 121.8(3)   |
| C5-C4-Br1   | 120.1(3)   |
| C4-C5-C6    | 118.6(3)   |
| C1-C6-C5    | 120.9(3)   |
| O1-C7-C1    | 120.4(3)   |
| O1-C7-C8    | 121.8(3)   |
| C8-C7-C1    | 117.8(3)   |
| N1-C8-C7    | 121.2(2)   |
| N1-C8-C9    | 106.3(2)   |
| C9-C8-C7    | 132.5(2)   |
| C8-C9-C10   | 127.4(2)   |
| C8-C9-C12   | 110.2(2)   |
| C12-C9-C10  | 122.4(2)   |
| O2-C10-C9   | 118.5(3)   |
| O2-C10-C11  | 122.2(3)   |
| C11-C10-C9  | 119.2(3)   |
| C9-C12-Si1  | 126.8(2)   |
| C16-C12-Si1 | 127.77(18) |
| C16-C12-C9  | 105.5(2)   |
| N1-C16-C17  | 116.9(2)   |
| C12-C16-N1  | 109.4(2)   |
| C12-C16-C17 | 133.7(2)   |
| C18-C17-C16 | 120.8(3)   |
| C17-C18-C19 | 120.4(2)   |
| C17-C18-C21 | 119.7(3)   |
| C19-C18-C21 | 119.8(3)   |
| C20-C19-C18 | 119.6(3)   |
| C19-C20-N1  | 120.4(3)   |
| N2-C21-C18  | 178.4(4)   |

**Compound 10n'**

Br1-C4 1.892(6)  
Br2-C15 1.891(6)  
O1-C11 1.229(6)  
N1-C9 1.410(6)  
N1-C10 1.398(6)  
N1-C18 1.358(6)  
N2-C22 1.140(8)  
C1-C2 1.391(7)  
C1-C6 1.392(7)  
C1-C7 1.471(7)  
C2-C3 1.385(7)  
C3-C4 1.381(7)  
C4-C5 1.366(7)  
C5-C6 1.370(7)  
C7-C8 1.399(7)  
C7-C10 1.393(7)  
C8-C9 1.380(7)  
C9-C21 1.405(7)  
C10-C11 1.463(7)  
C11-C12 1.483(7)  
C12-C13 1.383(7)  
C12-C17 1.384(7)  
C13-C14 1.376(7)  
C14-C15 1.376(7)  
C15-C16 1.384(7)  
C16-C17 1.379(7)  
C18-C19 1.360(7)  
C19-C20 1.425(8)  
C19-C22 1.439(9)

|             |          |
|-------------|----------|
| C20-C21     | 1.353(8) |
| C10-N1-C9   | 108.9(5) |
| C18-N1-C9   | 121.7(5) |
| C18-N1-C10  | 129.3(5) |
| C2-C1-C6    | 117.9(5) |
| C2-C1-C7    | 121.0(5) |
| C6-C1-C7    | 121.1(5) |
| C3-C2-C1    | 120.6(6) |
| C4-C3-C2    | 119.6(6) |
| C3-C4-Br1   | 120.1(5) |
| C5-C4-Br1   | 119.3(5) |
| C5-C4-C3    | 120.6(6) |
| C4-C5-C6    | 119.7(5) |
| C5-C6-C1    | 121.6(5) |
| C8-C7-C1    | 123.6(5) |
| C10-C7-C1   | 127.1(5) |
| C10-C7-C8   | 108.4(5) |
| C9-C8-C7    | 108.8(5) |
| C8-C9-N1    | 106.9(5) |
| C8-C9-C21   | 135.5(6) |
| C21-C9-N1   | 117.5(6) |
| N1-C10-C11  | 119.8(5) |
| C7-C10-N1   | 106.9(5) |
| C7-C10-C11  | 133.2(6) |
| O1-C11-C10  | 120.3(5) |
| O1-C11-C12  | 119.8(5) |
| C10-C11-C12 | 119.9(5) |
| C13-C12-C11 | 123.5(5) |
| C13-C12-C17 | 118.8(5) |
| C17-C12-C11 | 117.4(5) |

|             |          |
|-------------|----------|
| C14-C13-C12 | 120.8(5) |
| C15-C14-C13 | 119.5(5) |
| C14-C15-Br2 | 119.8(5) |
| C14-C15-C16 | 121.0(6) |
| C16-C15-Br2 | 119.1(4) |
| C17-C16-C15 | 118.7(5) |
| C16-C17-C12 | 121.2(5) |
| N1-C18-C19  | 119.6(6) |
| C18-C19-C20 | 120.8(6) |
| C18-C19-C22 | 116.8(6) |
| C20-C19-C22 | 122.3(6) |
| C21-C20-C19 | 118.9(6) |
| C20-C21-C9  | 121.3(6) |
| N2-C22-C19  | 178.6(8) |

### Pictures of dipolarophiles

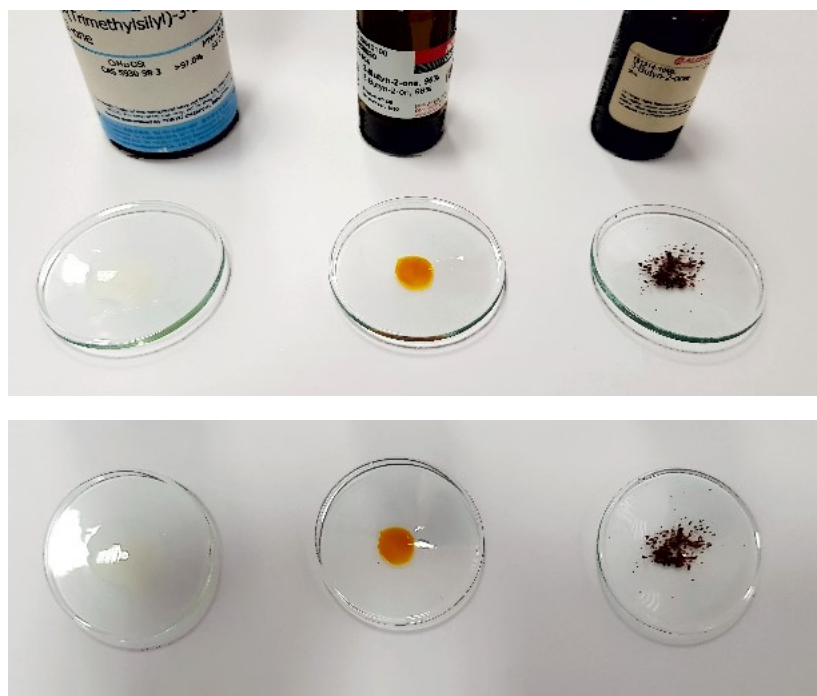

**Figure S2.** Picture of commercial dipolarophiles: 4-(trimethylsilyl)-3-butyn-2-one **1** (left) and 3-butyn-2-one (fresh batch (middle) and old batch (right)).
